# Supplementary material
Source: HighWire-hosted journal article supplement (http://injuryprevention.bmj.com/highwire/filestream/145366/field_highwire_adjunct_files/0/IP_Appendix_029429.xls)
Supplement: IP_Appendix_029429.xls [file IP_Appendix_029429.xls]

## Sheet: 2007
			CRASHES				PERSONS
FIPS_CODE	State_abv	County_name	Fatal	Non-Fatal Inj	PDO	Total	Injuries	Fatalities	Fatalities_fars	VMT	Population	Land_area	RUCC
1001	AL	Autauga County				1300	429	12	12	528.313	49960	595.968	2
1003	AL	Baldwin County				4627	1463	35	35	2014	171769	1596.35	4
1005	AL	Barbour County				561	218	6	6	423.979	27941	884.904	6
1007	AL	Bibb County				222	121	6	6	235.729	21535	623.025	1
1009	AL	Blount County				1048	368	15	15	623.889	56614	645.585	1
1011	AL	Bullock County				112	49	10	10	147.697	10781	625.013	6
1013	AL	Butler County				570	178	10	10	607.99	20157	776.867	6
1015	AL	Calhoun County				3229	1105	23	23	2685.07	113103	608.461	3
1017	AL	Chambers County				809	265	9	9	426.652	34764	597.168	6
1019	AL	Cherokee County				477	236	9	9	307.655	24560	553.121	8
1021	AL	Chilton County				965	376	25	25	702.473	42299	693.979	1
1023	AL	Choctaw County				155	74	4	4	176.658	14173	913.514	9
1025	AL	Clarke County				398	169	8	8	299.82	26496	1238.38	7
1027	AL	Clay County				153	57	3	3	172.137	13788	605.074	9
1029	AL	Cleburne County				403	138	13	13	423.304	14700	560.211	8
1031	AL	Coffee County				1127	309	10	10	545.153	46793	678.99	6
1033	AL	Colbert County				1501	453	14	14	632.683	54588	594.532	3
1035	AL	Conecuh County				365	158	8	8	421.605	13160	850.794	9
1037	AL	Coosa County				243	130	3	3	195.889	10864	652.443	8
1039	AL	Covington County				711	230	17	17	497.134	37007	1033.82	7
1041	AL	Crenshaw County				255	105	4	4	196.289	13805	609.58	8
1043	AL	Cullman County				2183	722	39	39	908.51	80554	738.428	6
1045	AL	Dale County				879	287	10	10	1142.16	48150	561.074	4
1047	AL	Dallas County				1130	437	7	7	389.019	43079	980.713	4
1049	AL	DeKalb County				1415	495	22	22	932.185	68016	777.913	6
1051	AL	Elmore County				1742	625	16	16	692.823	77525	621.256	2
1053	AL	Escambia County				759	328	8	8	578.923	37600	947.383	6
1055	AL	Etowah County				2835	942	25	25	1247.85	103217	534.822	3
1057	AL	Fayette County				260	125	5	5	223.247	17648	627.66	6
1059	AL	Franklin County				622	298	6	6	471.777	30439	635.645	6
1061	AL	Geneva County				410	200	8	8	275.753	25707	576.28	3
1063	AL	Greene County				275	118	8	8	336.541	9201	645.865	3
1065	AL	Hale County				275	128	14	14	214.306	18111	643.736	3
1067	AL	Henry County				284	98	2	2	274.616	16621	561.796	3
1069	AL	Houston County				3759	1008	31	31	1258.67	97171	580.36	3
1071	AL	Jackson County				876	401	25	25	806.491	53030	1078.74	6
1073	AL	Jefferson County				24115	5381	98	98	8681.61	658779	1112.61	1
1075	AL	Lamar County				106	59	5	5	199.814	14447	604.847	9
1077	AL	Lauderdale County				2168	585	8	8	863.148	88561	669.461	3
1079	AL	Lawrence County				566	272	10	10	405.907	34229	693.382	3
1081	AL	Lee County				3908	1016	21	21	1138.19	130516	608.71	3
1083	AL	Limestone County				1888	631	23	23	1093.85	73898	568.049	2
1085	AL	Lowndes County				284	117	10	10	347.731	12686	717.936	2
1087	AL	Macon County				610	235	14	14	485.603	22336	610.523	6
1089	AL	Madison County				10587	2901	34	34	3133.56	312734	804.922	2
1091	AL	Marengo County				364	176	6	6	282.354	21276	977.045	7
1093	AL	Marion County				515	219	11	11	551.706	29580	741.415	8
1095	AL	Marshall County				2552	765	13	13	840.538	87644	567.06	4
1097	AL	Mobile County				13334	3337	105	105	3889.23	404406	1233.09	2
1099	AL	Monroe County				362	180	9	9	242.109	22764	1025.85	7
1101	AL	Montgomery County				10063	2653	43	43	3355.7	225791	789.763	2
1103	AL	Morgan County				3349	961	22	22	1214.28	115050	582.213	3
1105	AL	Perry County				123	89	2	2	137.787	10602	719.484	8
1107	AL	Pickens County				206	116	3	3	254.752	19651	881.418	8
1109	AL	Pike County				893	285	11	11	449.17	29925	671.033	6
1111	AL	Randolph County				396	159	6	6	212.08	22425	581.045	6
1113	AL	Russell County				1932	703	12	12	625.092	50183	641.317	2
1115	AL	St. Clair County				1600	464	20	20	1213.23	78054	633.752	1
1117	AL	Shelby County				4956	1047	30	30	1696.79	182113	794.694	1
1119	AL	Sumter County				336	152	10	10	384.157	13306	904.935	8
1121	AL	Talladega County				2023	675	18	18	873.149	80255	739.532	4
1123	AL	Tallapoosa County				857	319	8	8	512.325	40747	717.933	6
1125	AL	Tuscaloosa County				7535	2224	45	45	2582.3	177906	1324.37	3
1127	AL	Walker County				1944	727	27	27	819.019	68816	794.391	1
1129	AL	Washington County				189	100	6	6	229.696	17226	1080.66	8
1131	AL	Wilcox County				191	104	5	5	160.354	12779	888.683	8
1133	AL	Winston County				370	160	5	5	243.035	24240	614.437	6
2013	AK	Aleutians East Borough	1	5	0	6	8	1	1	29.0424	2666	6988.14	9
2016	AK	Aleutians West Census Area		5	18	23			1	38.4646	4824	4396.77	7
2020	AK	Anchorage Municipality	27	1578	3807	5412	2253	27	25	2022.61	279671	1697.21	2
2050	AK	Bethel Census Area		8	23	31				162.821	17199	40633.3	7
2060	AK	Bristol Bay Borough	0	2	2	4	2	0	0	10.8489	996	504.916	9
2068	AK	Denali Borough	0	11	28	39	14	0	0	20.0233	1838	12749.7	8
2070	AK	Dillingham Census Area	1	6	10	17				54.4257	4996	18674.8	9
2090	AK	Fairbanks North Star Borough	19	374	1093	1486	517	20	19	361.698	97484	7366.24	3
2100	AK	Haines Borough	0	5	18	23	6	0	0	24.8932	2285	2343.73	9
2110	AK	Juneau City and Borough	1	139	205	345	196	1	1	204.645	30690	2716.67	5
2122	AK	Kenai Peninsula Borough	8	289	636	933	407	10	9	535.075	53097	16013.3	7
2130	AK	Ketchikan Gateway Borough	2	41	111	154	60	2	2	92.4678	13227	1233.22	7
2150	AK	Kodiak Island Borough	0	26	67	93	39	0	0	89.8324	12997	6559.85	7
2164	AK	Lake and Peninsula Borough	1	0	0	1	0	1	1	16.7505	1538	23782	9
2170	AK	Matanuska-Susitna Borough	12	421	1045	1478	633	14	11	749.633	82669	24681.5	2
2180	AK	Nome Census Area		4	3	7				86.0644	9315	23000.9	7
2185	AK	North Slope Borough	0	27	18	45	39	0	0	51.7106	6561	88817.1	7
2188	AK	Northwest Arctic Borough	0	1	0	1	1	0	0	64.8469	7453	35898.3	7
2201	AK	Prince of Wales-Outer Ketchikan Census Area	1	13	31	45			1	60.3781	5544	7410.62	9
2220	AK	Sitka City and Borough	0	15	90	105	22	0	0	58.8167	8874	2873.98	7
2232	AK	Skagway-Hoonah-Angoon Census Area		5	7	12				33.3198	3059	7896.48	9
2240	AK	Southeast Fairbanks Census Area	2	24	78	104			4	74.4988	6840	24814.9	8
2261	AK	Valdez-Cordova Census Area	3	31	58	92			2	103.439	9496	34319.1	9
2270	AK	Wade Hampton Census Area	1	0		1			3	83.0287	7623	17193.5	9
2280	AK	Wrangell-Petersburg Census Area		9	20	29				52.4387	6009	5834.94	7
2282	AK	Yakutat City and Borough	0	0	2	2	0	0	0	7.499	689	7650.46	9
2290	AK	Yukon-Koyukuk Census Area	3	13	19	35			3	63.5995	5838	145900	8
4001	AZ	Apache County	46	236	405	687	426	52	50	1376.04	69980	11204.9	6
4003	AZ	Cochise County	18	600	1460	2078	931	21	21	2024.16	127866	6169.45	4
4005	AZ	Coconino County	44	1085	3148	4277	1635	56	56	2327.41	127450	18617.4	3
4007	AZ	Gila County	21	385	883	1289	569	25	24	591.567	51994	4767.7	4
4009	AZ	Graham County	7	141	251	399	235	7	8	433.08	34769	4629.32	6
4011	AZ	Greenlee County	2	29	48	79	37	2	1	57.8035	7754	1847	7
4012	AZ	La Paz County	24	151	286	461	281	30	29	702.557	20172	4499.95	6
4013	AZ	Maricopa County	422	28501	64811	93734	42993	461	461	33354.9	3880181	9203.14	1
4015	AZ	Mohave County	45	1157	2315	3517	1812	52	52	2953.27	194944	13311.6	4
4017	AZ	Navajo County	45	443	1086	1574	721	53	56	1883.21	111273	9953.18	4
4019	AZ	Pima County	115	6984	13668	20767	10572	129	129	9027.1	967089	9186.27	2
4021	AZ	Pinal County	73	1185	2497	3755	1890	86	86	3976.42	299246	5369.59	1
4023	AZ	Santa Cruz County	8	169	486	663	273	8	8	504.096	42845	1237.63	4
4025	AZ	Yavapai County	55	1211	2708	3974	1796	59	59	2647.57	212635	8123.3	3
4027	AZ	Yuma County	27	1027	2063	3117	1534	30	31	1969.71	190557	5514.09	3
5001	AR	Arkansas County	4	153	258	415	252	4	4	209.725	19392	988.49	6
5003	AR	Ashley County	3	132	289	424	196	3	3	219.657	22326	921.148	7
5005	AR	Baxter County	10	262	478	750	428	13	13	320.222	41950	554.361	7
5007	AR	Benton County	32	1550	2456	4038	2928	35	35	1792.68	203107	845.994	2
5009	AR	Boone County	3	588	170	761	1405	3	3	358.213	36672	591.177	7
5011	AR	Bradley County	5	59	66	130	102	5	5	111.822	11979	650.628	6
5013	AR	Calhoun County	3	53	54	110	89	3	3	118.792	5535	628.274	9
5015	AR	Carroll County	5	266	124	395	598	7	7	265.397	27429	630.274	6
5017	AR	Chicot County	4	55	68	127	101	4	4	173.411	12305	644.027	7
5019	AR	Clark County	6	181	284	471	329	8	8	434.42	23585	865.433	7
5021	AR	Clay County	4	73	106	183	130	4	4	153.59	16134	639.298	7
5023	AR	Cleburne County	11	244	237	492	381	14	14	210.469	25407	553.049	6
5025	AR	Cleveland County	3	40	26	69	71	3	3	124.537	8769	597.739	3
5027	AR	Columbia County	2	132	174	308	232	2	2	255.82	24351	766.114	7
5029	AR	Conway County	6	156	310	472	240	8	8	433.286	20740	556.15	6
5031	AR	Craighead County	19	891	2140	3050	1426	20	18	820.433	91552	710.84	3
5033	AR	Crawford County	7	541	827	1375	927	7	7	743.561	59031	595.393	2
5035	AR	Crittenden County	16	828	720	1564	1943	16	16	919.197	52103	610.166	1
5037	AR	Cross County	8	198	139	345	385	9	9	177.5	18685	615.846	6
5039	AR	Dallas County	0	61	65	126	105	0	0	109.846	8249	667.42	6
5041	AR	Desha County	4	69	112	185	141	4	3	144.741	13799	764.989	6
5043	AR	Drew County	5	108	116	229	189	5	6	210.195	18745	828.182	7
5045	AR	Faulkner County	12	860	1506	2378	1487	13	12	1009.85	104865	647.378	2
5047	AR	Franklin County	1	137	73	211	277	1	1	310.958	18157	609.555	2
5049	AR	Fulton County	8	74	54	136	136	8	9	139.342	11752	618.155	9
5051	AR	Garland County	28	1170	2227	3425	2147	32	32	797.806	96371	677.223	3
5053	AR	Grant County	4	104	95	203	187	5	5	191.679	17460	631.777	2
5055	AR	Greene County	7	336	570	913	646	8	10	324.491	40397	577.509	6
5057	AR	Hempstead County	5	208	314	527	351	5	5	399.356	23226	728.774	6
5059	AR	Hot Spring County	10	300	239	549	578	10	10	546.634	31850	614.933	6
5061	AR	Howard County		88	89	177	173			150.757	13997	587.421	7
5063	AR	Independence County	13	364	695	1072	620	14	14	339.266	34566	763.781	7
5065	AR	Izard County	1	36	32	69	60	1	1	96.5916	12978	580.684	9
5067	AR	Jackson County	8	93	119	220	164	8	8	218.606	17219	633.524	6
5069	AR	Jefferson County	16	862	1321	2199	1709	22	22	892.212	78986	884.815	3
5071	AR	Johnson County	2	125	237	364	187	2	2	386.738	24747	662.168	6
5073	AR	Lafayette County	1	33	24	58	57	1	1	119.718	7760	526.497	8
5075	AR	Lawrence County	6	92	71	169	189	6	6	251.691	16860	586.567	6
5077	AR	Lee County	3	50	31	84	94	3	3	102.062	10859	601.663	6
5079	AR	Lincoln County	3	83	87	173	150	3	3	125.245	13729	561.202	3
5081	AR	Little River County	1	73	59	133	108	1	1	172.161	12812	531.734	6
5083	AR	Logan County	5	136	107	248	275	6	6	190.199	22599	709.873	6
5085	AR	Lonoke County	16	355	769	1140	607	17	17	832.315	63562	765.96	2
5087	AR	Madison County	6	68	57	131	129	6	6	165.39	15420	836.813	2
5089	AR	Marion County	3	63	71	137	110	3	3	143.159	16629	597.702	9
5091	AR	Miller County	7	359	599	965	626	10	10	565.958	42662	623.979	3
5093	AR	Mississippi County	15	286	693	994	461	17	17	663.027	46664	898.249	4
5095	AR	Monroe County	5	87	90	182	176	5	5	282.156	8712	606.647	7
5097	AR	Montgomery County		84	52	136	165			110.591	9048	780.927	8
5099	AR	Nevada County	7	68	79	154	110	8	8	229.175	9376	619.953	7
5101	AR	Newton County	4	85	11	100	151	4	4	76.0338	8339	822.969	9
5103	AR	Ouachita County	6	110	96	212	157	7	7	236.785	26068	732.45	7
5105	AR	Perry County	4	38	18	60	53	6	6	96.2978	10391	550.944	2
5107	AR	Phillips County	6	142	134	282	336	6	6	182.185	22035	692.672	7
5109	AR	Pike County	3	78	52	133	149	3	3	112.282	10791	603.008	9
5111	AR	Poinsett County	10	148	234	392	237	11	11	342.344	24850	757.739	3
5113	AR	Polk County	3	121	146	270	208	3	3	191.325	20197	859.379	7
5115	AR	Pope County	13	353	957	1323	560	13	13	625.703	58961	811.9	5
5117	AR	Prairie County	4	71	70	145	144	7	7	330.062	8739	645.934	8
5119	AR	Pulaski County	58	5123	7931	13112	9337	64	64	5653.87	373911	770.821	2
5121	AR	Randolph County	4	89	118	211	188	5	5	152.464	18089	651.824	7
5123	AR	St. Francis County	9	798	1510	2317	1336	9	11	533.059	26900	633.837	6
5125	AR	Saline County	2	110	67	179	184	2	9	536.308	96212	723.462	2
5127	AR	Scott County	4	76	11	91	136	5	2	134.72	11304	893.88	6
5129	AR	Searcy County	17	1299	2934	4250	2045	18	5	266.675	8087	667.149	9
5131	AR	Sebastian County	5	172	82	259	412	5	18	1010.98	121766	536.243	2
5133	AR	Sevier County	9	137	92	238	264	12	5	171.512	16325	563.941	7
5135	AR	Sharp County	8	362	121	491	878	11	11	679.495	17848	604.353	7
5137	AR	Stone County	3	48	88	139	71	3	3	112.422	11971	606.592	9
5139	AR	Union County	2	399	651	1052	700	2	2	438.644	43230	1038.9	5
5141	AR	Van Buren County	9	122	155	286	194	10	10	197.994	16507	711.514	8
5143	AR	Washington County	19	2525	3170	5714	5261	20	20	2101.93	194292	949.717	2
5145	AR	White County	21	932	715	1668	2118	23	23	745.507	73441	1034.03	4
5147	AR	Woodruff County	2	6	3	11	10	2	2	87.9252	7649	586.564	9
5149	AR	Yell County	6	126	160	292	199	7	7	206.205	21786	927.891	6
6001	CA	Alameda County	100	7324	17610	25034	9972	106	103	11444.2	1464202	737.572	1
6003	CA	Alpine County	2	30	26	58	41	2	2	17.7931	1145	738.617	8
6005	CA	Amador County	12	276	357	645	423	14	15	674.325	38678	592.966	6
6007	CA	Butte County	36	832	1252	2120	1254	37	37	2127.05	218779	1639.49	3
6009	CA	Calaveras County	13	294	372	679	443	17	17	794.674	46844	1020.04	6
6011	CA	Colusa County	6	135	300	441	216	11	11	312.377	21302	1150.68	6
6013	CA	Contra Costa County	65	3722	7962	11749	5036	70	73	8742.32	1019640	719.946	1
6015	CA	Del Norte County	9	127	248	384	186	10	10	215.554	29022	1007.81	7
6017	CA	El Dorado County	30	863	1307	2200	1237	31	31	2511.76	175689	1710.85	1
6019	CA	Fresno County	141	3783	6356	10280	5967	158	159	8965.59	899348	5962.73	2
6021	CA	Glenn County	10	131	256	397	226	14	14	453.193	28111	1314.79	6
6023	CA	Humboldt County	23	770	1530	2323	1046	26	26	1935.69	128864	3572.49	5
6025	CA	Imperial County	35	585	856	1476	963	42	42	2294.99	161867	4174.73	3
6027	CA	Inyo County	9	143	170	322	218	10	10	359.419	17449	10203.1	7
6029	CA	Kern County	142	3615	6403	10160	5557	156	156	9523.81	790710	8140.96	2
6031	CA	Kings County	26	646	1024	1696	1033	33	34	1291.97	148875	1390.99	3
6033	CA	Lake County	14	300	427	741	430	17	17	953.744	64664	1257.96	4
6035	CA	Lassen County	6	151	305	462	203	6	6	352.847	35031	4557.27	6
6037	CA	Los Angeles County	712	56475	91021	148208	82480	759	765	85462.8	9878554	4060.87	1
6039	CA	Madera County	41	728	1394	2163	1102	48	47	1933.21	146513	2135.86	3
6041	CA	Marin County	11	1072	2110	3193	1370	12	12	2454.55	248096	519.803	1
6043	CA	Mariposa County	6	121	176	303	173	6	6	299.848	18036	1451.12	8
6045	CA	Mendocino County	15	484	817	1316	710	18	18	1441.92	86273	3508.97	4
6047	CA	Merced County	42	1231	2516	3789	1891	48	46	2565.2	245514	1928.69	3
6049	CA	Modoc County	1	62	104	167	80	1	1	90.611	9197	3944.1	6
6051	CA	Mono County	2	89	171	262	121	2	2	124.66	12801	3044.4	7
6053	CA	Monterey County	39	1596	5212	6847	2243	47	48	4217.98	407637	3321.95	2
6055	CA	Napa County	12	792	1357	2161	1085	15	14	1625.29	132565	753.734	3
6057	CA	Nevada County	12	496	848	1356	703	13	13	1424.78	97027	957.613	4
6059	CA	Orange County	178	14185	24992	39355	20082	193	194	24712.7	2997033	789.404	1
6061	CA	Placer County	25	1524	2810	4359	2188	28	28	3196.47	332920	1404.37	1
6063	CA	Plumas County	5	129	178	312	179	5	5	374.737	20615	2553.69	7
6065	CA	Riverside County	279	9925	17897	28101	14601	318	324	24144	2073571	7207.37	1
6067	CA	Sacramento County	122	8546	12634	21302	12272	141	141	10282.4	1386667	965.652	1
6069	CA	San Benito County	5	265	397	667	381	6	6	964.023	54667	1389.06	1
6071	CA	San Bernardino County	308	9920	20901	31129	15090	354	360	22035.2	2007800	20052.5	1
6073	CA	San Diego County	268	14641	12989	27898	20807	295	292	35607.8	2974859	4199.89	1
6075	CA	San Francisco County	51	3632	2787	6470	4854	52	53	4332.62	764976	46.6945	1
6077	CA	San Joaquin County	96	3992	7426	11514	6003	106	107	5840.13	670990	1399.28	2
6079	CA	San Luis Obispo County	45	1190	3038	4273	1622	53	52	3426.48	262436	3304.32	3
6081	CA	San Mateo County	27	2762	5918	8707	3679	28	28	7745.53	706984	449.067	1
6083	CA	Santa Barbara County	42	2117	4423	6582	2886	50	51	4109.4	404197	2737.01	2
6085	CA	Santa Clara County	88	7301	10679	18068	9831	100	101	16154.1	1748976	1290.69	1
6087	CA	Santa Cruz County	22	1211	3004	4237	1587	26	27	1982.43	251747	445.241	2
6089	CA	Shasta County	22	1150	1870	3042	1643	24	25	2319.59	179427	3785.19	3
6091	CA	Sierra County	1	23	34	58	28	1	1	51.0477	3328	953.382	8
6093	CA	Siskiyou County	14	226	383	623	337	15	15	477.887	44296	6286.78	7
6095	CA	Solano County	47	1810	3757	5614	2565	51	51	3284.87	408599	829.19	2
6097	CA	Sonoma County	48	2255	3997	6300	3084	52	52	4625.17	464435	1575.88	2
6099	CA	Stanislaus County	65	2957	4801	7823	4414	82	82	4157.22	511263	1493.79	2
6101	CA	Sutter County	15	516	665	1196	740	18	18	768.269	92040	602.543	3
6103	CA	Tehama County	8	345	557	910	495	10	10	490.555	61114	2950.99	4
6105	CA	Trinity County	11	110	82	203	137	15	15	133.157	14177	3178.61	8
6107	CA	Tulare County	76	1936	4777	6789	3096	93	97	4987.79	421553	4823.97	2
6109	CA	Tuolumne County	10	357	540	907	536	10	11	760.228	55806	2235.41	4
6111	CA	Ventura County	71	3993	7395	11459	5562	74	75	8640.44	798364	1845.3	2
6113	CA	Yolo County	31	803	1438	2272	1175	33	34	1850.44	195844	1013.27	1
6115	CA	Yuba County	5	300	501	806	404	5	5	747.56	72098	630.694	3
8001	CO	Adams County							39	4077.19	422495	1191.93	1
8003	CO	Alamosa County							6	152.773	15313	722.743	7
8005	CO	Arapahoe County							36	4460.73	545089	803.145	1
8007	CO	Archuleta County								130.755	12572	1350.22	7
8009	CO	Baca County							1	59.2975	3871	2555.72	9
8011	CO	Bent County							1	61.1201	5844	1513.9	7
8013	CO	Boulder County							15	2380.74	290262	742.46	2
8014	CO	Broomfield County							4		53691		1
8015	CO	Chaffee County							3	158.518	16781	1013.45	7
8017	CO	Cheyenne County							1	48.7239	1763	1781.35	9
8019	CO	Clear Creek County							5	596.159	8956	395.448	1
8021	CO	Conejos County							2	70.7901	8074	1287.22	9
8023	CO	Costilla County							1	67.689	3309	1227.1	9
8025	CO	Crowley County							3	40.037	6643	788.995	8
8027	CO	Custer County							2	36.4002	4025	738.887	8
8029	CO	Delta County							14	234.826	30334	1142.11	6
8031	CO	Denver County							39	6232.55	588349	153.351	1
8033	CO	Dolores County							1	37.1626	1914	1066.97	9
8035	CO	Douglas County							14	2025.87	272117	840.112	1
8037	CO	Eagle County							13	720.481	51359	1687.88	5
8039	CO	Elbert County							2	224.151	22720	1850.78	1
8041	CO	El Paso County							39	4582.37	587272	2126.45	2
8043	CO	Fremont County							6	310.563	47389	1532.93	4
8045	CO	Garfield County							14	750.348	53631	2947.06	5
8047	CO	Gilpin County								72.6912	5091	149.868	1
8049	CO	Grand County							6	221.815	13612	1846.67	8
8051	CO	Gunnison County							4	189.12	14973	3238.81	7
8053	CO	Hinsdale County							2	17.0178	838	1117.68	9
8055	CO	Huerfano County							5	193.97	7837	1590.87	6
8057	CO	Jackson County							2	34.4835	1381	1613.21	9
8059	CO	Jefferson County							39	5005.02	529354	772.094	1
8061	CO	Kiowa County							2	55.6087	1332	1770.99	9
8063	CO	Kit Carson County							4	406.055	7928	2160.87	7
8065	CO	Lake County							3	496.683	7913	376.893	7
8067	CO	La Plata County							16	80.5422	49555	1692.15	6
8069	CO	Larimer County							25	3323.54	287574	2601.3	2
8071	CO	Las Animas County							7	269.866	16010	4772.63	7
8073	CO	Lincoln County							1	182.157	5326	2586.09	8
8075	CO	Logan County							2	282.639	21055	1838.52	7
8077	CO	Mesa County							29	1196.4	139082	3327.75	3
8079	CO	Mineral County							2	52.3951	962	875.719	9
8081	CO	Moffat County							4	165.942	13648	4742.25	7
8083	CO	Montezuma County							9	311.455	25221	2036.63	6
8085	CO	Montrose County							5	330.573	39527	2240.61	7
8087	CO	Morgan County							7	360.368	27961	1285.36	6
8089	CO	Otero County							2	170.167	18854	1262.86	6
8091	CO	Ouray County							2	83.872	4378	540.468	9
8093	CO	Park County							7	174.125	17004	2200.69	1
8095	CO	Phillips County							1	42.2794	4499	687.622	9
8097	CO	Pitkin County							2	157.127	15106	970.421	7
8099	CO	Prowers County							3	126.962	13181	1640.38	7
8101	CO	Pueblo County							23	1540.49	154538	2388.69	3
8103	CO	Rio Blanco County							1	78.9238	6227	3220.97	9
8105	CO	Rio Grande County							2	113.488	11627	911.605	7
8107	CO	Routt County							11	251.793	22382	2361.59	7
8109	CO	Saguache County							2	113.595	6920	3168.44	9
8111	CO	San Juan County							2	46.9596	559	387.423	9
8113	CO	San Miguel County							1	102.934	7533	1286.5	9
8115	CO	Sedgwick County							1	88.3742	2340	548.236	9
8117	CO	Summit County							5	407.02	26547	608.162	7
8119	CO	Teller County							1	170.31	21824	557.063	2
8121	CO	Washington County							5	126.66	4627	2520.98	9
8123	CO	Weld County							47	2245.16	243750	3992.45	3
8125	CO	Yuma County							1	94.4093	9666	2365.79	7
9001	CT	Fairfield County							53	7755.7	895015	625.802	2
9003	CT	Hartford County							66	8085.27	876824	735.44	1
9005	CT	Litchfield County							19	1566.44	188273	919.922	4
9007	CT	Middlesex County							15	1815.97	164150	369.263	1
9009	CT	New Haven County							75	7048.68	845494	605.638	2
9011	CT	New London County							39	3214.84	267376	665.915	2
9013	CT	Tolland County							16	1685	148139	410.071	1
9015	CT	Windham County							13	1180.27	117038	512.753	4
10001	DE	Kent County							21	1732.38	152255	589.721	3
10003	DE	New Castle County							56	5562.56	528218	426.266	1
10005	DE	Sussex County							39	2209.46	184291	937.577	4
11001	DC	District of Columbia	46	4071	10989	15106	6571	54	44	3957.52	588292	61.4033	1
12001	FL	Alachua County			2172	4247	3146	57	57	2896.48	240082	874.245	3
12003	FL	Baker County			109	298	311	6	6	567.038	25745	585.212	1
12005	FL	Bay County			1265	2575	2105	35	35	1930.84	163984	763.678	3
12007	FL	Bradford County			155	370	333	11	11	403.834	28769	293.133	6
12009	FL	Brevard County			1783	4549	4223	99	99	6724.89	536161	1018.19	2
12011	FL	Broward County			12921	26981	21023	253	253	16415.9	1759591	1205.4	1
12013	FL	Calhoun County			21	99	106	4	4	142.574	13594	567.311	6
12015	FL	Charlotte County			748	1695	1418	30	30	2135.63	152814	693.604	3
12017	FL	Citrus County			314	963	1006	23	23	1966.7	140169	583.811	4
12019	FL	Clay County			577	1483	1401	27	26	1713.64	182023	601.107	1
12021	FL	Collier County			1077	2473	2069	54	54	4594.9	315839	2025.34	2
12023	FL	Columbia County			261	830	896	28	28	1633.17	67985	797.047	6
12027	FL	DeSoto County			110	343	382	7	7	485.513	34675	637.266	6
12029	FL	Dixie County			45	129	140	8	8	173.994	14942	704.015	6
12031	FL	Duval County			8034	15348	10677	166	166	11670.3	849159	773.668	1
12033	FL	Escambia County			1946	4755	4569	64	64	4379.82	306407	662.353	2
12035	FL	Flagler County			236	792	824	16	16	1368.92	88397	484.996	4
12037	FL	Franklin County			38	96	101	2	2	113.657	10030	544.34	6
12039	FL	Gadsden County			269	700	674	14	14	1024.63	47197	516.132	2
12041	FL	Gilchrist County			41	138	156	6	6	238.994	17017	348.892	3
12043	FL	Glades County			74	151	114	3	3	131.241	11109	773.645	6
12045	FL	Gulf County			39	99	83	6	6	149.759	14059	554.597	6
12047	FL	Hamilton County			61	153	151	4	4	499.13	14301	514.862	6
12049	FL	Hardee County			131	358	355	7	7	404.529	28830	637.301	6
12051	FL	Hendry County			129	352	353	14	14	555.673	39611	1152.53	4
12053	FL	Hernando County			458	1698	2032	40	40	1969.02	169070	478.309	1
12055	FL	Highlands County			347	789	603	24	24	1318.75	99349	1028.27	4
12057	FL	Hillsborough County			9866	22613	20198	183	182	12166.2	1174727	1050.91	1
12059	FL	Holmes County			32	155	219	3	3	354.336	19245	482.449	6
12061	FL	Indian River County			552	1366	1382	23	23	1507.49	131837	503.231	3
12063	FL	Jackson County			185	535	537	18	18	1110.14	49287	915.644	6
12065	FL	Jefferson County			63	198	220	7	7	467.578	14451	597.736	2
12067	FL	Lafayette County			25	59	51	1	1	112.243	7998	542.836	8
12069	FL	Lake County			1032	2571	2323	58	58	1986.06	301059	953.15	1
12071	FL	Lee County			2654	6211	5234	106	106	7026.11	590564	803.63	2
12073	FL	Leon County			3082	5733	4012	22	22	3142.03	260945	666.74	2
12075	FL	Levy County			179	442	391	15	15	548.521	39065	1118.38	8
12077	FL	Liberty County			21	93	111	4	4	110.233	7851	835.866	8
12079	FL	Madison County			81	288	361	20	20	672.288	18957	691.795	6
12081	FL	Manatee County			1967	4074	3104	58	58	3268.87	315108	741.027	2
12083	FL	Marion County			1480	3941	3942	66	65	4376.56	324857	1578.86	2
12085	FL	Martin County			606	1361	1073	26	26	2256.44	139182	555.616	2
12086	FL	Miami-Dade County			25343	45218	30637	310	310	22487.5	2387170	1946.06	1
12087	FL	Monroe County			621	1409	1148	21	21	1026.85	73223	996.915	4
12089	FL	Nassau County			258	666	571	27	27	1136.21	68450	651.552	1
12091	FL	Okaloosa County			945	2026	1580	25	25	2485.38	181499	935.626	3
12093	FL	Okeechobee County			141	396	413	14	14	565.482	40311	773.943	4
12095	FL	Orange County			8004	18089	15163	186	186	11851.6	1066113	907.449	1
12097	FL	Osceola County			1077	3004	3144	52	52	1068.47	255815	1321.9	1
12099	FL	Palm Beach County			5984	14674	13207	206	206	11704.8	1266451	1974.11	1
12101	FL	Pasco County			2313	6263	6948	99	99	4010.94	462715	744.848	1
12103	FL	Pinellas County			5893	13228	10964	114	113	10653	917437	279.917	1
12105	FL	Polk County			2815	6957	6312	106	105	7092.37	574746	1874.38	2
12107	FL	Putnam County			426	1104	1023	23	23	1035.84	73821	721.89	4
12109	FL	St. Johns County			807	1936	1588	35	35	1574.96	175446	609.01	1
12111	FL	St. Lucie County			965	2393	2110	44	43	3077.63	260939	572.445	2
12113	FL	Santa Rosa County			477	1419	1652	25	25	1692.08	147044	1016.93	2
12115	FL	Sarasota County			1558	3452	2754	61	61	4342.92	372073	571.551	2
12117	FL	Seminole County			1266	2895	2417	48	48	5148.33	409509	308.204	1
12119	FL	Sumter County			294	846	846	26	26	1231.75	72246	545.729	4
12121	FL	Suwannee County			144	418	433	20	20	909.214	39525	687.64	6
12123	FL	Taylor County			128	332	346	13	13	261.616	19771	1041.91	6
12125	FL	Union County			34	115	135	4	4	93.161	14991	240.285	6
12127	FL	Volusia County			2484	6113	5336	108	106	5936.89	500413	1103.25	2
12129	FL	Wakulla County			115	260	251	4	4	417.385	29726	606.659	2
12131	FL	Walton County			315	671	539	22	22	1091.76	52881	1057.56	6
12133	FL	Washington County			55	198	208	10	10	509.849	22886	579.929	6
13001	GA	Appling County							7	252.862	17946	508.507	7
13003	GA	Atkinson County							3	149.364	8223	338.043	9
13005	GA	Bacon County							6	133.73	10507	284.949	7
13007	GA	Baker County								61.0043	3781	343.22	3
13009	GA	Baldwin County							11	434.672	46057	258.445	4
13011	GA	Banks County							5	290.777	16556	233.671	8
13013	GA	Barrow County							15	695.409	67139	162.171	1
13015	GA	Bartow County							27	1810.67	92834	459.426	1
13017	GA	Ben Hill County							2	191.359	17650	251.794	7
13019	GA	Berrien County							4	214.191	16722	452.413	6
13021	GA	Bibb County							23	2087.18	154709	249.962	3
13023	GA	Bleckley County							1	146.732	12306	217.395	6
13025	GA	Brantley County							11	185.724	15440	444.401	3
13027	GA	Brooks County							5	214.718	16340	493.621	3
13029	GA	Bryan County							6	577.452	30132	441.71	2
13031	GA	Bulloch County							20	844.394	66176	682.072	4
13033	GA	Burke County							10	321.284	22754	830.471	2
13035	GA	Butts County							11	370.472	23759	186.612	1
13037	GA	Calhoun County							4	88.8963	6098	280.181	8
13039	GA	Camden County							12	783.015	48689	629.913	4
13043	GA	Candler County							8	244.063	10550	246.875	7
13045	GA	Carroll County							32	1229.11	111954	498.933	1
13047	GA	Catoosa County							3	790.29	62241	162.225	2
13049	GA	Charlton County							5	167.195	10609	780.771	6
13051	GA	Chatham County							39	2846.27	248469	438.114	2
13053	GA	Chattahoochee County								57.8127	9430	248.769	2
13055	GA	Chattooga County							3	256.292	26797	313.328	6
13057	GA	Cherokee County							22	1969.2	204363	423.678	1
13059	GA	Clarke County							12	1044.28	114063	120.791	3
13061	GA	Clay County							3	47.1254	3207	195.208	9
13063	GA	Clayton County							35	2747.19	272217	142.622	1
13065	GA	Clinch County							4	123.978	6992	809.288	6
13067	GA	Cobb County							59	6498.23	691905	340.15	1
13069	GA	Coffee County							3	424.657	40085	598.896	7
13071	GA	Colquitt County							13	460.187	44814	552.268	6
13073	GA	Columbia County							11	919.449	109100	290.015	2
13075	GA	Cook County							5	425.247	16432	229.018	6
13077	GA	Coweta County							22	1410.05	118936	442.617	1
13079	GA	Crawford County							1	130.857	12483	325.007	3
13081	GA	Crisp County							7	464.608	22125	273.818	6
13083	GA	Dade County							5	366.235	16098	173.978	2
13085	GA	Dawson County							6	227.297	21484	211.037	1
13087	GA	Decatur County							10	412.841	28544	596.799	6
13089	GA	DeKalb County							71	7448.43	737093	268.206	1
13091	GA	Dodge County							4	233.01	20042	500.286	7
13093	GA	Dooly County							12	458.542	11592	392.879	6
13095	GA	Dougherty County							6	1018.55	95693	329.599	3
13097	GA	Douglas County							18	1449.61	124495	199.299	1
13099	GA	Early County							7	189.595	11836	511.232	6
13101	GA	Echols County							1	43.5585	4093	404.126	3
13103	GA	Effingham County							7	468.584	50728	479.414	2
13105	GA	Elbert County							8	230.65	20525	368.755	6
13107	GA	Emanuel County							4	409.564	22469	685.789	7
13109	GA	Evans County							10	129.284	11505	184.921	6
13111	GA	Fannin County							5	265.199	22580	385.74	8
13113	GA	Fayette County							8	1052.96	106144	197.05	1
13115	GA	Floyd County							26	991.859	95618	513.13	3
13117	GA	Forsyth County							13	1454.45	158914	225.795	1
13119	GA	Franklin County							6	552.223	21793	263.295	8
13121	GA	Fulton County							109	11649.2	992137	528.658	1
13123	GA	Gilmer County							12	361.629	28389	426.687	6
13125	GA	Glascock County							1	35.7467	2771	144.141	9
13127	GA	Glynn County							18	1035.96	74932	422.368	3
13129	GA	Gordon County							16	890.269	52044	355.535	6
13131	GA	Grady County							11	297.612	25042	458.124	6
13133	GA	Greene County							4	343.11	15662	388.276	6
13135	GA	Gwinnett County							67	6843.7	776380	432.73	1
13137	GA	Habersham County							12	474.531	42272	278.17	6
13139	GA	Hall County							27	1804.69	180175	393.658	3
13141	GA	Hancock County							1	123.819	9568	473.284	7
13143	GA	Haralson County							9	381.577	28718	282.112	1
13145	GA	Harris County							9	421.288	29073	463.692	2
13147	GA	Hart County							2	289.979	24240	232.209	6
13149	GA	Heard County							4	129.939	11387	296.028	1
13151	GA	Henry County							26	2175.52	186037	322.712	1
13153	GA	Houston County							12	1268.77	131016	376.751	3
13155	GA	Irwin County							2	135.798	9934	356.808	7
13157	GA	Jackson County							23	1013.21	59254	342.362	6
13159	GA	Jasper County							4	166.922	13660	370.423	1
13161	GA	Jeff Davis County							5	155.949	13291	333.385	7
13163	GA	Jefferson County							7	273.709	16454	527.65	6
13165	GA	Jenkins County							3	132.575	8595	349.807	6
13167	GA	Johnson County							1	103.505	9533	304.263	9
13169	GA	Jones County							10	307.562	27229	393.747	3
13171	GA	Lamar County							1	259.456	16961	184.821	1
13173	GA	Lanier County							2	94.2237	7947	186.825	3
13175	GA	Laurens County							8	902.703	47520	812.269	6
13177	GA	Lee County							6	226.433	33050	355.77	3
13179	GA	Liberty County							10	686.125	60503	519.052	3
13181	GA	Lincoln County							2	88.2704	8098	211.094	8
13183	GA	Long County							7	159.274	11300	400.919	3
13185	GA	Lowndes County							14	1405.47	101790	504.221	3
13187	GA	Lumpkin County							8	275.058	26554	284.469	6
13189	GA	McDuffie County							10	327.853	21551	259.773	2
13191	GA	McIntosh County							3	468.577	11420	433.449	3
13193	GA	Macon County							3	161.65	13524	403.284	6
13195	GA	Madison County							8	299.834	28012	283.88	3
13197	GA	Marion County								88.2558	7024	366.999	2
13199	GA	Meriwether County							8	308.839	22748	503.282	1
13201	GA	Miller County							4	106.696	6163	283.046	8
13205	GA	Mitchell County							9	301.272	24139	511.957	6
13207	GA	Monroe County							7	937.766	25145	395.63	3
13209	GA	Montgomery County							3	110.402	9060	245.325	9
13211	GA	Morgan County							12	499.116	18165	349.635	6
13213	GA	Murray County							6	305.287	40664	344.411	3
13215	GA	Muscogee County							23	1559.64	187046	216.258	2
13217	GA	Newton County							14	964.018	96019	276.433	1
13219	GA	Oconee County							6	452.122	31367	185.705	3
13221	GA	Oglethorpe County							3	175.243	13963	441.111	3
13223	GA	Paulding County							26	879.656	127906	313.43	1
13225	GA	Peach County							8	502.713	25672	151.058	6
13227	GA	Pickens County							11	360.278	30488	232.129	1
13229	GA	Pierce County							7	213.279	17881	343.252	6
13231	GA	Pike County							2	190.834	17204	218.374	1
13233	GA	Polk County							15	417.771	41460	311.141	6
13235	GA	Pulaski County							4	117.1	9843	247.423	6
13237	GA	Putnam County							8	262.101	20251	344.53	6
13239	GA	Quitman County							1	59.0503	2666	151.543	9
13241	GA	Rabun County							4	231.051	16519	371.048	9
13243	GA	Randolph County							1	117.247	7294	429.246	6
13245	GA	Richmond County							33	1914.66	197372	324.037	2
13247	GA	Rockdale County							13	938.213	82052	130.631	1
13249	GA	Schley County							1	50.9785	4123	167.606	8
13251	GA	Screven County							3	221.501	15037	648.441	6
13253	GA	Seminole County							2	120.464	9081	238.038	6
13255	GA	Spalding County							12	670.605	62826	197.951	1
13257	GA	Stephens County							7	288.292	25268	179.257	7
13259	GA	Stewart County							4	110.776	4647	458.699	8
13261	GA	Sumter County							4	323.006	32532	485.283	6
13263	GA	Talbot County							2	123.111	6607	393.213	8
13265	GA	Taliaferro County							1	121.337	1884	195.389	8
13267	GA	Tattnall County							5	246.733	23179	483.693	6
13269	GA	Taylor County								165.841	8738	377.44	8
13271	GA	Telfair County							2	142.094	13366	441.091	7
13273	GA	Terrell County							2	160.978	10260	335.369	3
13275	GA	Thomas County							9	564.689	45237	548.304	4
13277	GA	Tift County							13	644.849	41610	265.049	4
13279	GA	Toombs County							6	310.41	27820	366.649	7
13281	GA	Towns County							3	130.831	10894	166.663	9
13283	GA	Treutlen County							7	216.601	6938	200.66	7
13285	GA	Troup County							24	928.047	63535	413.905	4
13287	GA	Turner County							6	409.837	9270	286.028	6
13289	GA	Twiggs County							3	298.9	10280	360.288	3
13291	GA	Union County							4	291.354	20968	322.549	9
13293	GA	Upson County							3	278.73	27562	325.483	6
13295	GA	Walker County							11	575.259	64554	446.58	2
13297	GA	Walton County							14	795.829	83144	329.18	1
13299	GA	Ware County							14	493.93	35831	902.293	4
13301	GA	Warren County							4	206.135	5908	285.522	8
13303	GA	Washington County							9	284.621	20937	680.341	7
13305	GA	Wayne County							12	363.983	29046	644.662	6
13307	GA	Webster County							1	65.3887	2245	209.536	8
13309	GA	Wheeler County							2	103.035	6830	297.716	9
13311	GA	White County							3	225.281	25020	241.578	8
13313	GA	Whitfield County							26	1459.93	93379	289.985	3
13315	GA	Wilcox County							4	104.57	8613	380.296	9
13317	GA	Wilkes County							3	138.995	10262	471.374	6
13319	GA	Wilkinson County							6	161.452	10064	446.557	8
13321	GA	Worth County							7	323.068	21285	569.727	3
15001	HI	Hawaii County							38	1716.52	173057	4028.02	5
15003	HI	Honolulu County							67	6467.12	905601	599.766	2
15005	HI	Kalawao County								2.1215	119	13.2055	9
15007	HI	Kauai County							9	792.183	62828	622.439	5
15009	HI	Maui County							24	1444.35	141783	1159.2	5
16001	ID	Ada County	22	2429	4291	6742			23	2782.59	373406	1054.99	2
16003	ID	Adams County	1	34	46	81			1	37.559	3546	1364.58	8
16005	ID	Bannock County	3	454	1080	1537			5	858.144	79925	1113.3	3
16007	ID	Bear Lake County	1	26	63	90			1	62.6507	5863	971.381	7
16009	ID	Benewah County	2	68	117	187			2	97.5204	9243	776.069	6
16011	ID	Bingham County	11	249	500	760			12	465.294	43466	2094.73	6
16013	ID	Blaine County	2	87	196	285			2	226.667	21560	2644.78	7
16015	ID	Boise County	5	107	109	221			5	79.8337	7571	1902.46	2
16017	ID	Bonner County	5	203	455	663			6	433.046	41050	1737.67	6
16019	ID	Bonneville County	8	635	1097	1740			10	1025.5	96545	1868.48	3
16021	ID	Boundary County	2	44	143	189			2	114.18	10872	1268.81	7
16023	ID	Butte County	1	17	49	67			1	29.3631	2771	2232.85	8
16025	ID	Camas County	2	6	9	17			2	11.4946	1102	1074.96	9
16027	ID	Canyon County	18	1183	2088	3289			18	1300.77	179381	589.718	2
16029	ID	Caribou County	0	40	81	121				73.1039	6862	1766.01	6
16031	ID	Cassia County	6	190	304	500			7	225.161	20960	2566.45	7
16033	ID	Clark County	0	27	50	77				9.9075	906	1764.63	8
16035	ID	Clearwater County	2	51	101	154			2	31.3523	8231	2461.4	6
16037	ID	Custer County	4	23	36	63			4	43.752	4166	4925.45	9
16039	ID	Elmore County	15	204	305	524			21	307.895	28856	3077.57	4
16041	ID	Franklin County	5	65	134	204			5	129.099	12203	665.434	3
16043	ID	Fremont County	2	68	147	217			3	131.484	12517	1866.76	6
16045	ID	Gem County	1	57	77	135			5	173.666	16496	562.577	2
16047	ID	Gooding County	2	79	134	215			2	152.762	14250	730.781	7
16049	ID	Idaho County	6	101	157	264			6	119.505	15345	8484.88	6
16051	ID	Jefferson County	4	99	174	277			5	241.048	22851	1095.08	3
16053	ID	Jerome County	17	113	265	395			19	213.394	20066	599.836	7
16055	ID	Kootenai County	14	855	1505	2374			17	1583.49	134442	1245.12	3
16057	ID	Latah County	5	207	381	593			5	379.452	36299	1076.65	4
16059	ID	Lemhi County	1	47	53	101			1	81.9452	7717	4564.16	7
16061	ID	Lewis County	1	30	36	67			1		3581	479.043	8
16063	ID	Lincoln County	1	31	66	98			1	47.5985	4497	1205.53	9
16065	ID	Madison County	2	139	430	571			2	373.427	36647	471.525	6
16067	ID	Minidoka County	4	98	193	295			4	200.493	18564	759.623	7
16069	ID	Nez Perce County	5	264	522	791			7	360.38	38932	849.08	3
16071	ID	Oneida County	3	38	77	118			3	44.3781	4106	1200.33	8
16073	ID	Owyhee County	4	48	77	129			4	114.962	10835	7677.98	2
16075	ID	Payette County	3	88	140	231			6	241.799	22751	407.517	6
16077	ID	Power County	3	51	108	162			3	81.9932	7684	1405.57	3
16079	ID	Shoshone County	4	68	159	231			4	138.724	12838	2633.91	6
16081	ID	Teton County	1	30	116	147			1	80.0105	8349	450.364	9
16083	ID	Twin Falls County	16	443	634	1093			20	758.791	73058	1925.03	5
16085	ID	Valley County	1	87	214	302			1	92.9893	8945	3677.82	8
16087	ID	Washington County	3	51	81	135			3	106.961	10147	1456.32	6
17001	IL	Adams County				1895	426	5	5	487.218	67046	856.634	5
17003	IL	Alexander County				221	110	5	5	106.852	8458	236.382	7
17005	IL	Bond County				501	150	1	1	270.662	18103	380.203	1
17007	IL	Boone County				1313	447	10	10	589.86	53531	281.265	2
17009	IL	Brown County				260	35	1	1	51.5801	6566	305.649	7
17011	IL	Bureau County				1182	262	2	2	522.3	35036	868.564	6
17013	IL	Calhoun County				251	26	1	1	37.0565	5167	253.816	1
17015	IL	Carroll County				494	113	1	1	138.035	15928	444.212	7
17017	IL	Cass County				379	64	4	4	111.897	13727	375.901	6
17019	IL	Champaign County				4429	1239	19	19	1775.4	190260	996.806	3
17021	IL	Christian County				851	233	5	5	299.92	34543	709.061	6
17023	IL	Clark County				574	85	4	4	366.905	16884	501.503	6
17025	IL	Clay County				413	104	2	2	148.206	13893	469.249	7
17027	IL	Clinton County				713	197	10	10	372.269	36450	474.233	1
17029	IL	Coles County				1429	337	3	3	512.114	51011	508.286	5
17031	IL	Cook County				206884	44874	348	348	35767.2	5285107	945.68	1
17033	IL	Crawford County				700	129	4	4	162.195	19611	443.535	6
17035	IL	Cumberland County				372	70	6	6	297.567	10842	346.017	9
17037	IL	DeKalb County				2569	777	16	16	876.08	103729	634.156	1
17039	IL	De Witt County				434	82	1	1	189.709	16437	397.576	6
17041	IL	Douglas County				376	97	3	3	269.756	19598	416.862	6
17043	IL	DuPage County				29171	7111	37	37	8920.18	929192	333.606	1
17045	IL	Edgar County				481	99	3	3	167.679	18919	623.555	6
17047	IL	Edwards County				211	23	2	2	65.766	6572	222.348	9
17049	IL	Effingham County				1395	373	9	9	615.191	34225	478.7	7
17051	IL	Fayette County				639	170	4	4	406.176	21466	716.487	6
17053	IL	Ford County				277	95	2	2	159.588	14170	485.899	3
17055	IL	Franklin County				1164	334	14	14	523.754	39491	412.075	5
17057	IL	Fulton County				1218	294	4	4	298.504	36843	865.624	6
17059	IL	Gallatin County				165	45	3	3	75.8712	6025	323.728	8
17061	IL	Greene County				385	83	2	2	108.189	13890	543.091	6
17063	IL	Grundy County				1507	404	12	12	623.745	47144	419.903	1
17065	IL	Hamilton County				241	50	3	3	80.9385	8245	435.164	7
17067	IL	Hancock County				575	127	5	5	182.696	18839	794.622	7
17069	IL	Hardin County				112	53	2	2	40.4402	4468	178.333	9
17071	IL	Henderson County				285	92	2	2	101.835	7587	378.812	9
17073	IL	Henry County				1275	321	5	5	644.664	49654	823.212	2
17075	IL	Iroquois County				905	288	10	10	475.264	30294	1116.43	6
17077	IL	Jackson County				1867	536	11	11	459.234	58841	588.125	5
17079	IL	Jasper County				316	71	2	2	121.678	9707	494.404	7
17081	IL	Jefferson County				1434	363	7	7	672.752	40168	570.956	7
17083	IL	Jersey County				745	215	11	11	195.281	22455	369.157	1
17085	IL	Jo Daviess County				775	149	9	9	207.097	22304	601.08	6
17087	IL	Johnson County				361	66	2	2	233.917	13065	344.627	7
17089	IL	Kane County				14536	4106	35	35	3445.78	501021	520.436	1
17091	IL	Kankakee County				3214	952	17	17	941.104	110705	676.749	3
17093	IL	Kendall County				2402	801	14	14	755.865	96818	320.579	1
17095	IL	Knox County				1284	333	9	9	544.687	51855	716.281	4
17097	IL	Lake County				19700	5377	36	36	6092.65	710241	447.564	1
17099	IL	La Salle County				3576	895	32	32	1342.8	112616	1134.92	4
17101	IL	Lawrence County				386	77	2	2	160.147	15588	371.984	7
17103	IL	Lee County				1161	297	8	8	568.028	35450	725.364	4
17105	IL	Livingston County				888	299	18	18	590.583	38258	1043.76	4
17107	IL	Logan County				875	236	11	11	492.063	29962	618.14	6
17109	IL	McDonough County				911	206	6	6	248.871	31992	589.27	5
17111	IL	McHenry County				7266	2129	30	30	2140.35	315943	603.508	1
17113	IL	McLean County				4390	1278	20	20	1928.77	164209	1183.53	3
17115	IL	Macon County				3385	1091	11	11	979.247	108732	580.523	3
17117	IL	Macoupin County				1133	295	7	7	431.903	48235	863.574	1
17119	IL	Madison County				7485	2086	33	33	2401.45	267347	725.018	1
17121	IL	Marion County				1193	351	11	11	457.975	39587	572.264	4
17123	IL	Marshall County				371	91	4	4	193.77	12851	386.062	2
17125	IL	Mason County				352	65	3	3	118.711	15151	538.943	6
17127	IL	Massac County				454	148	4	4	220.332	15109	239.054	7
17129	IL	Menard County				262	52	1	1	91.6027	12466	314.247	3
17131	IL	Mercer County				344	100	1	1	124.7	16490	561.024	2
17133	IL	Monroe County				755	184	5	5	373.262	32372	388.292	1
17135	IL	Montgomery County				858	240	7	7	500.732	29810	703.795	6
17137	IL	Morgan County				976	252	5	5	349.141	35272	568.757	4
17139	IL	Moultrie County				383	98	3	3	147.605	14324	335.596	6
17141	IL	Ogle County				1455	365	15	15	638.727	55011	758.833	4
17143	IL	Peoria County				6088	1785	18	18	1703.48	182993	619.522	2
17145	IL	Perry County				649	169	6	6	191.619	22596	440.961	7
17147	IL	Piatt County				292	103	0	0	217.623	16493	440.022	3
17149	IL	Pike County				931	94	3	3	257.968	16707	830.299	7
17151	IL	Pope County				88	25	2	2	45.9685	4182	370.863	9
17153	IL	Pulaski County				185	39	2	2	121.175	6490	200.786	9
17155	IL	Putnam County				238	46	1	1	56.198	6014	159.796	8
17157	IL	Randolph County				827	184	4	4	251.948	32760	578.416	6
17159	IL	Richland County				477	123	3	3	145.922	15546	360.142	7
17161	IL	Rock Island County				4509	1267	15	15	1345.28	147329	426.751	2
17163	IL	St. Clair County				7938	2407	45	45	3260.41	261316	663.808	1
17165	IL	Saline County				725	197	6	6	237.863	26102	383.309	7
17167	IL	Sangamon County				6496	1844	27	27	2220.29	194122	868.182	3
17169	IL	Schuyler County				417	78	1	1	92.6463	6990	437.314	7
17171	IL	Scott County				194	40	0		89.6885	5215	250.916	9
17173	IL	Shelby County				559	130	5	5	220.746	21759	758.511	6
17175	IL	Stark County				160	56	0		64.6492	6191	287.938	2
17177	IL	Stephenson County				1542	334	9	9	387.833	46573	564.184	4
17179	IL	Tazewell County				3405	920	13	13	1277.13	131154	648.86	2
17181	IL	Union County				529	128	3	3	222.571	18257	416.161	7
17183	IL	Vermilion County				2059	646	12	12	806.608	81191	899.08	3
17185	IL	Wabash County				302	54	0	0	88.004	12165	223.471	6
17187	IL	Warren County				551	131	2	2	191.078	17402	542.521	7
17189	IL	Washington County				475	125	5	5	340.543	14769	562.608	6
17191	IL	Wayne County				587	125	7	7	238.902	16568	713.898	7
17193	IL	White County				541	84	3	3	208.017	14657	494.87	6
17195	IL	Whiteside County				1557	439	7	7	555.351	59198	684.77	4
17197	IL	Will County				16893	4388	43	43	4495.82	673586	836.941	1
17199	IL	Williamson County				2044	534	9	9	777.458	64541	423.414	5
17201	IL	Winnebago County				9071	2792	30	30	3091.56	298759	513.737	2
17203	IL	Woodford County				710	246	7	7	466.717	38017	527.95	2
18001	IN	Adams County	3	108	673	784			3	414.025	33644	339.36	6
18003	IN	Allen County	21	2202	10038	12261			21	3510.62	349488	657.25	2
18005	IN	Bartholomew County	18	612	1716	2346			19	486.258	74750	406.838	3
18007	IN	Benton County	4	33	115	152			4	138.88	8810	406.31	3
18009	IN	Blackford County	2	50	328	380			2	129.581	13189	165.097	6
18011	IN	Boone County	10	263	1601	1874			12	808.851	54137	422.853	1
18013	IN	Brown County	4	132	419	555			4	231.341	14670	312.264	1
18015	IN	Carroll County	0	120	603	723				260.895	19987	372.258	3
18017	IN	Cass County	6	230	1271	1507			7	474.726	39193	412.868	4
18019	IN	Clark County	7	797	3576	4380			7	1333.4	105035	375.039	1
18021	IN	Clay County	8	133	630	771			8	404.011	26648	357.617	3
18023	IN	Clinton County	3	191	787	981			5	507.224	33795	405.096	6
18025	IN	Crawford County	5	57	313	375			5	318.684	10782	305.681	8
18027	IN	Daviess County	5	139	365	509			7	332.625	30035	430.658	7
18029	IN	Dearborn County	8	279	1692	1979			10	890.206	49759	305.212	1
18031	IN	Decatur County	5	106	650	761			6	538.099	24959	372.604	6
18033	IN	DeKalb County	5	225	1249	1479			5	646.241	41796	362.878	4
18035	IN	Delaware County	21	756	3904	4681			27	1203.76	115419	393.292	3
18037	IN	Dubois County	8	213	775	996			8	528.594	41225	430.086	7
18039	IN	Elkhart County	37	1189	6500	7726			47	1978.45	197942	463.814	3
18041	IN	Fayette County	2	116	523	641			2	256.724	24273	214.963	7
18043	IN	Floyd County	10	549	2049	2608			10	789.41	73064	147.999	1
18045	IN	Fountain County	3	71	366	440			4	320.152	17143	395.691	6
18047	IN	Franklin County	7	116	452	575			9	348.099	23234	386.003	1
18049	IN	Fulton County	2	90	515	607			2	262.441	20308	368.508	7
18051	IN	Gibson County	8	158	934	1100			9	447.873	32754	488.784	2
18053	IN	Grant County	14	400	1958	2372			14	990.773	68847	414.029	4
18055	IN	Greene County	15	157	747	919			15	423.74	32692	541.728	3
18057	IN	Hamilton County	18	1074	5689	6781			22	2105.09	261661	397.94	1
18059	IN	Hancock County	10	337	1196	1543			13	834.216	66305	306.125	1
18061	IN	Harrison County	9	207	1067	1283			9	570.526	36810	485.217	1
18063	IN	Hendricks County	16	634	3046	3696			17	1317.55	134558	408.394	1
18065	IN	Henry County	9	268	1007	1284			10	745.087	47181	392.927	4
18067	IN	Howard County	9	510	2029	2548			11	730.784	83776	293.067	3
18069	IN	Huntington County	4	206	1055	1265			4	677.441	37743	382.593	6
18071	IN	Jackson County	6	267	1264	1537			6	727.48	42184	509.315	4
18073	IN	Jasper County	8	237	1029	1274			8	756.083	32275	559.866	1
18075	IN	Jay County	2	109	558	669			2	266.299	21514	383.637	6
18077	IN	Jefferson County	7	191	874	1072			8	375.206	32704	361.365	6
18079	IN	Jennings County	5	170	661	836			5	351.401	28106	377.224	6
18081	IN	Johnson County	14	639	2326	2979			15	1302.52	135951	320.193	1
18083	IN	Knox County	7	224	681	912			8	432.167	37949	515.834	4
18085	IN	Kosciusko County	8	417	2586	3011			10	956.502	76115	537.503	4
18087	IN	LaGrange County	2	119	923	1044			2	660.207	37032	379.563	6
18089	IN	Lake County	46	3106	15436	18588			53	4748.69	492104	496.985	1
18091	IN	LaPorte County	26	721	2827	3574			26	997.961	109787	598.238	3
18093	IN	Lawrence County	9	287	962	1258			11	588.369	46033	448.831	4
18095	IN	Madison County	16	860	3485	4361			18	1348.75	131312	452.13	3
18097	IN	Marion County	72	5675	22218	27965			79	8337.09	876804	396.249	1
18099	IN	Marshall County	5	284	1484	1773			6	617.63	46698	444.274	6
18101	IN	Martin County	2	42	229	273			3	122.913	10058	336.136	6
18103	IN	Miami County	7	163	924	1094			10	448.307	36641	375.619	6
18105	IN	Monroe County	3	902	3151	4056			4	976.175	128643	394.346	3
18107	IN	Montgomery County	4	203	918	1125			4	745.043	37881	504.511	6
18109	IN	Morgan County	10	358	1246	1614			10	907.375	69874	406.471	1
18111	IN	Newton County	5	58	371	434			5	244.63	14014	401.849	1
18113	IN	Noble County	2	205	1323	1530			2	622.499	47526	411.112	6
18115	IN	Ohio County	2	24	239	265			2	68.4293	5772	86.7235	1
18117	IN	Orange County	2	119	506	627			2	222.162	19607	399.521	6
18119	IN	Owen County	4	127	464	595			4	353.124	22398	385.178	3
18121	IN	Parke County	1	85	531	617			1	174.098	17169	444.774	6
18123	IN	Perry County	2	104	404	510			2	356.844	18916	381.394	6
18125	IN	Pike County	3	40	141	184			3	163.654	12605	336.176	6
18127	IN	Porter County	22	1064	3999	5085			24	1637.5	160578	418.11	1
18129	IN	Posey County	2	81	382	465			3	529.117	26262	408.5	2
18131	IN	Pulaski County	4	81	483	568			4	182.068	13778	433.676	6
18133	IN	Putnam County	10	142	619	771			10	714.032	37014	480.311	1
18135	IN	Randolph County	6	91	518	615			6	341.074	25859	452.833	6
18137	IN	Ripley County	5	151	622	778			7	424.702	27350	446.361	6
18139	IN	Rush County	3	110	301	414			3	220.418	17494	408.283	6
18141	IN	St. Joseph County	14	1702	6548	8264			15	2210.99	266088	457.341	2
18143	IN	Scott County	4	174	410	588			6	339.702	23679	190.388	6
18145	IN	Shelby County	9	270	988	1267			10	701.871	44063	412.639	1
18147	IN	Spencer County	4	99	546	649			4	415.75	20334	398.686	8
18149	IN	Starke County	6	130	646	782			8	277.56	23542	309.311	6
18151	IN	Steuben County	7	172	1504	1683			8	748.021	33450	308.724	7
18153	IN	Sullivan County	4	58	228	290			5	236.813	21366	447.196	3
18155	IN	Switzerland County	1	49	197	247			1	114.692	9684	221.181	8
18157	IN	Tippecanoe County	20	1079	6375	7474			22	1317.48	163364	499.792	3
18159	IN	Tipton County	3	92	303	398			3	194.46	16069	260.385	3
18161	IN	Union County	2	39	144	185			3	113.549	7203	161.548	8
18163	IN	Vanderburgh County	14	1116	4537	5667			16	1517.95	174425	234.572	2
18165	IN	Vermillion County	4	97	314	415			5	280.582	16417	256.888	3
18167	IN	Vigo County	13	771	2878	3662			14	1320.62	104915	403.295	3
18169	IN	Wabash County	2	189	897	1088			2	402.037	32918	413.17	6
18171	IN	Warren County	5	42	203	250			6	133.709	8482	364.883	8
18173	IN	Warrick County	4	191	1241	1436			4	808.469	57090	384.075	2
18175	IN	Washington County	9	128	629	766			9	304.853	27920	514.416	1
18177	IN	Wayne County	6	433	1502	1941			6	996.492	68260	403.566	5
18179	IN	Wells County	10	131	583	724			12	287.626	27927	369.959	2
18181	IN	White County	5	139	843	987			5	427.021	23819	505.236	6
18183	IN	Whitley County	10	134	735	879			10	452.767	32655	335.519	2
19001	IA	Adair County	0	35	110	188	44	0	0	264.524	7624	569.302	8
19003	IA	Adams County	0	7	44	72	7	0	0	47.3019	4096	423.54	9
19005	IA	Allamakee County	1	26	98	149	34	1	1	112.597	14610	639.564	6
19007	IA	Appanoose County	4	18	70	149	28	4	4	108.773	13019	496.252	7
19009	IA	Audubon County	2	19	46	85	27	2	2	51.5421	6072	443.131	8
19011	IA	Benton County	2	47	168	255	62	2	2	296.211	26546	716.389	3
19013	IA	Black Hawk County	2	84	205	438	110	2	10	1198.96	127446	567.114	3
19015	IA	Boone County	9	36	102	222	50	12	13	256.7	26391	571.46	6
19017	IA	Bremer County	3	38	133	289	54	3	3	237.836	23734	437.897	3
19019	IA	Buchanan County	3	29	76	179	34	3	3	253.41	20927	571.258	6
19021	IA	Buena Vista County	1	34	89	190	44	3	3	161.026	19776	574.784	7
19023	IA	Butler County	2	16	61	90	19	2	2	134.753	14660	580.379	8
19025	IA	Calhoun County	1	16	62	113	23	1	1	101.084	9987	570.15	9
19027	IA	Carroll County	4	28	61	101	26	6	6	190.651	20923	569.313	7
19029	IA	Cass County	2	15	62	141	20	2	3	287.122	13884	564.329	6
19031	IA	Cedar County	3	33	217	385	43	3	3	430.338	17990	579.522	6
19033	IA	Cerro Gordo County	5	50	156	304	68	5	8	551.083	44016	568.326	5
19035	IA	Cherokee County	2	21	94	149	33	48	3	109.947	11686	577.151	6
19037	IA	Chickasaw County	1	19	123	156	24	1	1	131.401	12215	504.644	6
19039	IA	Clarke County	2	37	164	255	52	2	2	178.533	8995	431.116	6
19041	IA	Clay County	6	34	84	162	46	6	7	183.922	16689	568.887	7
19043	IA	Clayton County	4	28	196	323	37	5	5	189.139	17685	778.807	8
19045	IA	Clinton County	5	61	232	434	87	5	11	417.899	49051	694.98	4
19047	IA	Crawford County	1	20	98	168	28	1	1	174.387	16579	714.364	6
19049	IA	Dallas County	6	58	271	441	76	8	9	655.282	57288	586.465	2
19051	IA	Davis County	5	22	118	164	39	5	5	84.6084	8572	503.24	9
19053	IA	Decatur County	2	20	99	146	22	2	2	175.014	8409	531.804	9
19055	IA	Delaware County	1	30	153	260	40	1	1	199.728	17459	577.854	6
19057	IA	Des Moines County	4	63	156	320	91	4	5	322.672	40701	416.148	5
19059	IA	Dickinson County	1	42	146	269	60	1	1	172.85	16696	381.059	7
19061	IA	Dubuque County	6	95	293	603	119	6	9	724.238	92359	608.156	3
19063	IA	Emmet County	0	9	77	124	9	0		85.655	10414	395.743	7
19065	IA	Fayette County	4	27	191	275	42	5	5	181.142	20433	730.925	6
19067	IA	Floyd County	1	28	119	172	86	43	1	175.065	16306	500.565	7
19069	IA	Franklin County	1	23	116	234	32	1	1	239.095	10568	582.435	7
19071	IA	Fremont County	1	31	125	189	45	1	1	192.137	7571	511.08	8
19073	IA	Greene County	0	34	122	190	46	0		103.199	9505	568.407	6
19075	IA	Grundy County	5	30	100	213	39	5	5	155.636	12149	502.514	3
19077	IA	Guthrie County	1	24	95	141	30	1	1	94.3686	11053	590.601	2
19079	IA	Hamilton County	4	36	195	284	39	5	5	350.519	15596	576.68	6
19081	IA	Hancock County	1	27	67	119	38	1	1	117.602	11379	571.11	7
19083	IA	Hardin County	3	27	119	228	54	4	4	164.889	17551	569.257	6
19085	IA	Harrison County	2	51	192	376	64	2	3	273.512	15409	696.723	2
19087	IA	Henry County	3	51	146	310	75	3	4	198.226	20123	434.437	7
19089	IA	Howard County	3	18	105	163	26	3	3	94.5181	9545	473.403	7
19091	IA	Humboldt County	1	29	120	172	32	1	1	103.989	9615	434.411	7
19093	IA	Ida County	2	15	66	115	29	2	2	70.0951	6940	431.706	8
19095	IA	Iowa County	4	47	299	463	69	7	7	414.133	15912	586.449	8
19097	IA	Jackson County	5	19	86	144	16	5	5	175.188	20035	636.089	6
19099	IA	Jasper County	5	42	205	378	60	5	8	639.987	36748	729.988	6
19101	IA	Jefferson County	3	27	124	178	36	4	5	121.107	15618	435.341	7
19103	IA	Johnson County	7	116	470	728	154	10	11	1340.3	125692	614.479	3
19105	IA	Jones County	0	29	114	261	42	0	1	191.471	20402	575.308	3
19107	IA	Keokuk County	5	21	38	87	26	5	5	105.194	10770	579.188	8
19109	IA	Kossuth County	0	22	53	98	32	0		160.336	15605	973.006	7
19111	IA	Lee County	5	48	249	471	59	5	5	305.659	35619	517.392	5
19113	IA	Linn County	10	101	879	1082	140	11	16	1853.96	205836	717.442	3
19115	IA	Louisa County	4	23	107	217	32	4	4	98.7185	11795	401.917	8
19117	IA	Lucas County	2	23	119	159	35	3	3	92.4299	9421	430.548	6
19119	IA	Lyon County	1	24	82	135	31	2	2	102.397	11266	587.501	8
19121	IA	Madison County	2	36	142	213	46	2	2	131.643	15416	561.136	2
19123	IA	Mahaska County	2	29	113	169	39	2	2	225.642	22280	570.87	7
19125	IA	Marion County	2	54	100	254	66	2	2	277.081	32775	554.214	6
19127	IA	Marshall County	3	43	161	339	53	3	4	355.667	39316	572.316	4
19129	IA	Mills County	2	24	165	241	29	3	4	230.807	15180	436.534	2
19131	IA	Mitchell County	2	18	63	95	24	2	2	90.773	10738	468.922	7
19133	IA	Monona County	1	27	105	208	32	2	2	199.994	9131	693.116	6
19135	IA	Monroe County	1	17	90	142	20	2	2	83.5729	7586	433.405	7
19137	IA	Montgomery County	1	4	58	71	8	1	1	93.8098	11002	423.882	6
19139	IA	Muscatine County	2	60	142	275	73	2	2	367.916	42423	438.669	4
19141	IA	O'Brien County	2	25	148	209	38	2	2	122.592	14062	573.078	7
19143	IA	Osceola County	1	12	105	129	18	1	1	70.5115	6468	398.773	7
19145	IA	Page County	1	20	65	152	32	1	1	128.198	15874	534.824	7
19147	IA	Palo Alto County	4	14	49	78	26	4	4	92.186	9442	563.832	7
19149	IA	Plymouth County	10	52	135	258	82	10	12	244.721	24373	863.564	6
19151	IA	Pocahontas County	0	9	27	44	12	0	0	87.4998	7686	577.702	9
19153	IA	Polk County	6	125	981	1367	169	6	32	4525.31	418339	569.346	2
19155	IA	Pottawattamie County	6	96	447	733	120	8	13	1297.81	89409	954.262	2
19157	IA	Poweshiek County	4	39	178	272	50	5	5	391.409	18672	585.035	7
19159	IA	Ringgold County	1	3	37	47	5	1		52.831	5152	537.666	9
19161	IA	Sac County	6	22	67	127	32	8	8	114.325	10385	575.823	9
19163	IA	Scott County	5	64	409	573	83	5	18	1642.79	162687	457.934	2
19165	IA	Shelby County	1	3	11	43	6	1	1	109.382	12313	590.83	6
19167	IA	Sioux County	6	68	174	327	115	8	8	258.903	32351	767.883	6
19169	IA	Story County	5	79	314	566	105	8	12	772.055	84752	572.86	3
19171	IA	Tama County	6	40	145	283	59	8	8	192.68	17855	721.298	6
19173	IA	Taylor County	0	11	48	79	17	0	0	45.1835	6397	533.953	9
19175	IA	Union County	2	15	40	72	23	4	5	114.861	12146	424.387	6
19177	IA	Van Buren County	1	18	99	134	19	1	1	70.2357	7690	484.818	9
19179	IA	Wapello County	4	38	114	221	63	4	5	294.911	35551	431.809	5
19181	IA	Warren County	3	69	152	584	97	3	5	572.854	44503	571.644	2
19183	IA	Washington County	4	48	190	291	61	5	5	245.899	21346	568.713	3
19185	IA	Wayne County	0	14	36	61	20	0	0	61.0351	6292	525.604	9
19187	IA	Webster County	10	36	145	292	61	11	16	350.44	38587	715.235	5
19189	IA	Winnebago County	2	9	54	75	15	2	2	75.5687	10961	400.467	7
19191	IA	Winneshiek County	5	44	260	347	64	6	6	199.716	20909	689.609	7
19193	IA	Woodbury County	2	57	154	318	84	2	9	934.171	102287	872.594	3
19195	IA	Worth County	3	22	83	134	32	3	3	170.453	7685	399.997	9
19197	IA	Wright County	6	23	117	201	32	6	6	143.42	13064	580.723	7
20001	KS	Allen County	4	75	245	324	106	5	5	140.937	13414	503.007	7
20003	KS	Anderson County	3	46	169	218	68	3	3	73.855	7908	582.918	6
20005	KS	Atchison County	1	72	332	405	94	1	1	141.277	16571	432.338	6
20007	KS	Barber County	3	19	175	197	27	3	3	43.6429	4786	1134.11	9
20009	KS	Barton County	3	127	493	623	195	3	3	223.766	27768	894.004	7
20011	KS	Bourbon County	2	60	266	328	90	2	2	144.928	14803	637.088	6
20013	KS	Brown County	0	84	207	291	108	0	0	108.019	10068	570.674	6
20015	KS	Butler County	12	353	1242	1607	495	12	12	857.081	63045	1427.85	2
20017	KS	Chase County	1	30	162	193	37	1	1	142.731	2882	775.887	8
20019	KS	Chautauqua County	1	15	61	77	15	1	1	58.5676	3806	641.686	9
20021	KS	Cherokee County	9	93	369	471	163	9	9	177.573	21337	587.115	6
20023	KS	Cheyenne County		5	23	28	8			25.5623	2801	1019.88	9
20025	KS	Clark County	2	18	60	80	31	2	2	32.2194	2094	974.684	9
20027	KS	Clay County		21	173	194	34			68.9423	8685	643.842	7
20029	KS	Cloud County	2	53	280	335	96	2	2	75.3191	9382	715.634	7
20031	KS	Coffey County	1	62	207	270	94	1	1	158.789	8454	629.746	6
20033	KS	Comanche County	1	12	24	37	21	1	1	17.2009	1888	788.313	9
20035	KS	Cowley County	3	194	816	1013	289	3	3	277.836	34251	1126.24	4
20037	KS	Crawford County	5	170	765	940	249	5	5	327.971	38860	592.907	4
20039	KS	Decatur County	2	6	51	59	11	2	2	45.4658	2955	893.545	9
20041	KS	Dickinson County	6	96	409	511	133	6	6	340.576	18957	847.922	7
20043	KS	Doniphan County	1	40	146	187	52	3	3	135.083	7756	392.177	3
20045	KS	Douglas County	5	822	2691	3518	1084	5	5	876.532	113488	456.87	3
20047	KS	Edwards County	1	8	57	66	10	1	1	47.8118	3106	622.015	9
20049	KS	Elk County	0	23	70	93	29	0	0	27.7296	3040	647.293	8
20051	KS	Ellis County	4	155	559	718	213	5	5	334.064	27464	899.971	5
20053	KS	Ellsworth County	2	39	210	251	46	2	2	173.333	6310	715.906	7
20055	KS	Finney County	8	129	616	753	195	10	10	244.255	38295	1301.77	5
20057	KS	Ford County	4	95	503	602	140	4	4	227.468	33340	1098.5	5
20059	KS	Franklin County	4	170	538	712	231	4	4	432.578	26479	573.854	1
20061	KS	Geary County	7	174	610	791	241	8	8	277.576	25150	384.694	5
20063	KS	Gove County	2	29	86	117	64	2	2	226.265	2637	1071.38	9
20065	KS	Graham County	1	15	69	85	27	1	1	23.7835	2607	898.286	9
20067	KS	Grant County	1	29	99	129	43	1	1	40.1973	7497	574.857	7
20069	KS	Gray County	4	25	44	73	36	6	6	86.7895	5641	868.901	9
20071	KS	Greeley County	1	11	22	34	13	1	1	11.8349	1297	778.005	9
20073	KS	Greenwood County	3	47	150	200	64	3	3	69.6815	6993	1139.67	6
20075	KS	Hamilton County	2	6	33	41	8	2	2	40.5004	2632	996.492	9
20077	KS	Harper County	3	42	151	196	79	4	4	53.0691	5819	801.439	8
20079	KS	Harvey County	6	131	586	723	184	6	6	367.477	33493	539.333	2
20081	KS	Haskell County	1	27	64	92	48	1	1	62.0322	4032	577.365	9
20083	KS	Hodgeman County	1	11	36	48	16	1	1	17.9447	1971	859.923	9
20085	KS	Jackson County	2	85	260	347	119	2	2	155.944	13420	655.594	3
20087	KS	Jefferson County	2	98	400	500	121	2	2	284.118	18467	536.112	3
20089	KS	Jewell County	1	13	122	136	15	1	1	49.1811	3198	909.179	9
20091	KS	Johnson County	27	2611	9972	12610	3512	29	29	5236.13	526319	476.776	1
20093	KS	Kearny County	0	30	65	95	43	0	0	63.7962	4148	871.06	9
20095	KS	Kingman County	2	39	196	237	56	3	1	78.3607	7826	863.347	6
20097	KS	Kiowa County	4	25	79	108	45	4	4	45.4227	2953	722.394	9
20099	KS	Labette County	5	140	448	593	200	5	5	219.235	21973	648.822	7
20101	KS	Lane County	1	1	31	33	1	1	1	15.9122	1746	717.218	9
20103	KS	Leavenworth County	9	309	1224	1542	436	10	10	660.874	73603	463.272	1
20105	KS	Lincoln County	3	21	77	101	30	3	3	65.8405	3285	718.869	9
20107	KS	Linn County	2	41	178	221	61	2	2	150.272	9767	598.67	1
20109	KS	Logan County	1	10	54	65	18	1	1	44.4511	2628	1072.99	9
20111	KS	Lyon County	6	236	841	1083	347	6	6	519.337	35981	850.869	5
20113	KS	McPherson County	3	45	214	262	70	4	6	432.625	29196	899.711	6
20115	KS	Marion County		49	252	301	69		4	151.661	12238	943.107	6
20117	KS	Marshall County	6	141	545	692	199	6	6	114.58	10186	902.531	7
20119	KS	Meade County	1	22	68	91	35	1	1	67.7328	4403	978.416	9
20121	KS	Miami County	6	149	602	757	209	6	6	319.517	31078	576.72	1
20123	KS	Mitchell County	1	40	186	227	46	1	1	50.9162	6307	699.822	7
20125	KS	Montgomery County	7	165	794	966	245	7	7	310.1	34511	645.204	5
20127	KS	Morris County	1	45	119	165	60	1	1	91.8152	5967	697.378	9
20129	KS	Morton County	1	12	45	58	13	1	1	27.7085	3038	729.92	9
20131	KS	Nemaha County	3	51	188	242	76	4	4	156.921	10201	717.987	8
20133	KS	Neosho County	6	82	458	546	114	6	6	156.1	16228	571.748	7
20135	KS	Ness County		14	53	67	22			27.2742	2991	1074.75	9
20137	KS	Norton County	1	24	151	176	26	1	1	34.1411	5422	877.843	7
20139	KS	Osage County	6	96	291	393	141	11	11	362.546	16459	703.504	3
20141	KS	Osborne County	1	20	70	91	28	1	1	59.5754	3871	892.389	9
20143	KS	Ottawa County	1	20	145	166	26	3	3	92.3975	6006	721.111	9
20145	KS	Pawnee County	0	61	167	228	87	0	0	35.1175	6415	754.173	7
20147	KS	Phillips County	2	35	191	228	53	2	2	47.6925	5356	886.229	7
20149	KS	Pottawatomie County	5	126	384	515	178	5	5	243.759	19396	844.239	6
20151	KS	Pratt County		49	252	301	83		2	76.1018	9426	734.991	7
20153	KS	Rawlins County	2	11	40	53	17	2	2	23.3104	2558	1069.62	9
20155	KS	Reno County	9	350	1290	1649	499	12	12	515.437	63145	1254.42	4
20157	KS	Republic County	1	22	188	211	31	2	2	61.2397	4901	716.383	9
20159	KS	Rice County	1	61	204	266	79	1	1	71.3471	10080	726.578	7
20161	KS	Riley County	6	461	1167	1634	659	6	6	466.089	69083	609.55	5
20163	KS	Rooks County	1	20	168	189	25	1	1	79.4068	5160	888.344	9
20165	KS	Rush County	0	11	103	114	14	0	0	49.4015	3211	718.207	9
20167	KS	Russell County	3	47	236	286	72	3	3	177.596	6737	884.68	7
20169	KS	Saline County	5	371	903	1279	533	6	6	604.2	54583	719.613	5
20171	KS	Scott County	2	14	80	96	22	3	3	21.6952	4568	717.525	7
20173	KS	Sedgwick County	37	3545	7627	11209	4905	39	39	4853.1	476026	999.376	2
20175	KS	Seward County	7	67	352	426	104	8	8	137.657	23109	639.523	7
20177	KS	Shawnee County	9	1066	3129	4204	1542	9	9	1838.45	173476	549.815	3
20179	KS	Sheridan County	1	8	75	84	12	1	1	38.3326	2493	896.356	9
20181	KS	Sherman County	3	28	160	191	40	3	3	193.805	5959	1055.8	7
20183	KS	Smith County	1	9	83	93	13	1	1	60.7734	3951	895.431	9
20185	KS	Stafford County	1	27	147	175	41	1	1	67.4812	4387	792.054	9
20187	KS	Stanton County		12	32	44	25			19.7231	2162	680.004	9
20189	KS	Stevens County	0	24	69	93	37	0	0	17.4886	5061	727.528	7
20191	KS	Sumner County	10	146	475	631	221	13	13	442.252	23888	1181.81	2
20193	KS	Thomas County	2	41	232	275	66	2	2	252.76	7314	1074.78	7
20195	KS	Trego County		16	84	100	27			178.168	2927	888.293	9
20197	KS	Wabaunsee County	2	64	190	256	99	3	3	184.382	6870	797.381	3
20199	KS	Wallace County		4	23	27	4			13.2758	1456	913.994	9
20201	KS	Washington County	5	22	224	251	37	5	5	89.8299	5840	898.458	9
20203	KS	Wichita County		11	38	49	12			20.0613	2200	718.517	9
20205	KS	Wilson County	3	61	218	282	90	3	3	110.776	9807	573.808	7
20207	KS	Woodson County	3	17	78	98	32	3	3	41.4764	3318	500.606	9
20209	KS	Wyandotte County	27	1148	3376	4551	1675	28	28	1714.32	153956	151.39	1
21001	KY	Adair County	4	69	233	306	105	4	4	167.832	17830	406.838	7
21003	KY	Allen County	0	77	218	295	109	0	0	185.403	18899	346.122	6
21005	KY	Anderson County	0	111	344	455	185	0	0	189.141	21245	202.67	6
21007	KY	Ballard County	3	41	122	166	55	3	3	101.955	8307	251.161	9
21009	KY	Barren County	7	278	919	1204	452	8	8	571.879	41184	490.974	6
21011	KY	Bath County	1	41	142	184	59	1	1	253.242	11592	279.458	8
21013	KY	Bell County	3	161	433	597	242	3	3	281.612	28987	360.768	7
21015	KY	Boone County	11	668	3249	3928	928	12	12	1112.13	112459	246.26	1
21017	KY	Bourbon County	5	132	451	588	177	6	6	201.838	19756	291.43	2
21019	KY	Boyd County	5	389	1647	2041	571	5	5	560.808	48481	160.168	2
21021	KY	Boyle County	5	156	683	844	232	7	7	284.785	28664	181.897	7
21023	KY	Bracken County	1	39	140	180	61	2	2	89.008	8574	203.218	1
21025	KY	Breathitt County	4	134	211	349	231	5	5	133.164	15651	495.193	7
21027	KY	Breckinridge County	3	94	169	266	149	3	3	234.224	19086	572.41	8
21029	KY	Bullitt County	8	396	1222	1626	574	10	10	878.668	73931	299.076	1
21031	KY	Butler County	4	39	111	154	63	4	4	137.67	13256	428.079	8
21033	KY	Caldwell County	3	71	233	307	99	3	3	152.738	12769	346.98	6
21035	KY	Calloway County	5	178	806	989	256	5	5	344.359	36189	386.254	7
21037	KY	Campbell County	8	403	2349	2760	585	8	8	1027.75	86858	151.554	1
21039	KY	Carlisle County	1	19	42	62	24	1	1	63.3603	5166	192.486	9
21041	KY	Carroll County	8	62	222	292	98	9	9	217.476	10527	130.088	6
21043	KY	Carter County	10	135	432	577	209	12	12	676.874	27424	410.599	6
21045	KY	Casey County	4	68	207	279	101	4	4	167.974	16169	445.612	9
21047	KY	Christian County	9	481	1613	2103	678	9	9	1103.56	80868	721.315	3
21049	KY	Clark County	6	168	873	1047	251	6	6	583.074	35550	254.31	2
21051	KY	Clay County	13	132	196	341	196	13	13	238.814	23730	471.01	7
21053	KY	Clinton County	3	38	113	154	60	4	4	117.027	9536	197.455	9
21055	KY	Crittenden County	5	60	134	199	94	5	5	69.0126	9130	362.141	6
21057	KY	Cumberland County	2	27	67	96	35	2	2	53.076	6876	305.822	9
21059	KY	Daviess County	12	530	2578	3120	760	13	12	797.226	93756	462.389	3
21061	KY	Edmonson County	1	41	127	169	48	1	1	124.826	11978	302.623	3
21063	KY	Elliott County	3	22	40	65	25	3	3	55.0944	7139	233.961	9
21065	KY	Estill County	1	58	152	211	73	1	1	88.7727	14975	253.932	6
21067	KY	Fayette County	24	2154	9745	11923	3050	26	26	2565.86	279044	284.515	2
21069	KY	Fleming County	2	56	214	272	80	2	2	146.681	14695	350.844	7
21071	KY	Floyd County	13	376	595	984	578	14	14	455.793	42021	394.294	7
21073	KY	Franklin County	1	293	1439	1733	412	1	1	623.59	48425	210.46	4
21075	KY	Fulton County	1	42	103	146	59	1	1	56.3653	6795	208.95	7
21077	KY	Gallatin County	4	53	198	255	78	9	9	286.002	8035	98.8064	1
21079	KY	Garrard County	2	104	246	352	137	2	2	159.29	17041	231.207	6
21081	KY	Grant County	1	173	638	812	276	1	1	441.208	25161	259.93	1
21083	KY	Graves County	9	199	636	844	307	9	9	432.488	37557	555.592	7
21085	KY	Grayson County	5	182	428	615	232	5	5	268.395	25356	503.676	6
21087	KY	Green County	0	10	73	83	17	0	0	142.001	11572	288.661	8
21089	KY	Greenup County	5	155	558	718	235	6	6	362.732	37270	346.106	2
21091	KY	Hancock County	1	40	85	126	50	4	4	80.7286	8617	188.8	3
21093	KY	Hardin County	15	465	2205	2685	703	18	18	700.184	97949	627.977	3
21095	KY	Harlan County	8	164	342	514	257	9	9	214.908	31065	467.195	7
21097	KY	Harrison County	3	124	419	546	185	4	4	202.704	18552	309.679	6
21099	KY	Hart County	9	114	291	414	173	9	9	350.664	18409	415.93	8
21101	KY	Henderson County	15	328	1276	1619	495	17	16	494.844	45296	440.124	2
21103	KY	Henry County	3	89	226	318	135	3	3	285.713	15711	289.318	1
21105	KY	Hickman County	6	13	24	43	21	6	6	60.6264	4938	244.445	9
21107	KY	Hopkins County	7	261	1113	1381	355	8	8	409.675	46286	550.558	4
21109	KY	Jackson County	7	78	130	215	110	8	8	104.882	13586	346.331	9
21111	KY	Jefferson County	78	5261	22346	27685	7724	80	80	8909.58	709264	385.088	1
21113	KY	Jessamine County	6	270	1157	1433	408	6	6	434.036	45555	173.133	2
21115	KY	Johnson County	8	149	335	492	224	9	9	224.046	24012	261.544	7
21117	KY	Kenton County	11	801	4225	5037	1096	11	11	1699.85	156675	161.966	1
21119	KY	Knott County	6	122	209	337	197	6	6	212.013	17280	352.193	9
21121	KY	Knox County	9	218	453	680	352	9	9	320.051	32528	387.665	7
21123	KY	Larue County	3	65	219	287	115	3	3	182.529	13661	263.196	3
21125	KY	Laurel County	15	461	1199	1675	751	17	17	934.386	57351	435.67	7
21127	KY	Lawrence County	9	68	138	215	139	10	10	160.395	16322	418.775	6
21129	KY	Lee County	4	41	58	103	65	4	4	57.4176	7441	209.859	9
21131	KY	Leslie County	6	86	73	165	125	6	6	144.497	11777	404.03	9
21133	KY	Letcher County	10	143	250	403	222	11	11	248.607	24014	339.044	9
21135	KY	Lewis County	6	51	137	194	83	6	6	170.376	13885	484.488	8
21137	KY	Lincoln County	9	106	294	409	180	11	11	254.423	25245	336.259	7
21139	KY	Livingston County	4	61	146	211	84	5	5	173.704	9610	316.082	9
21141	KY	Logan County	5	137	454	596	178	5	5	307.046	27129	555.684	6
21143	KY	Lyon County	2	67	173	242	97	2	2	359.255	8253	215.703	8
21145	KY	McCracken County	18	601	1810	2429	896	19	19	824.11	64765	251.025	5
21147	KY	McCreary County	5	60	130	195	104	5	5	212.638	17326	427.698	9
21149	KY	McLean County	4	44	90	138	66	4	5	101.057	9731	254.295	3
21151	KY	Madison County	18	402	2040	2460	591	18	18	1164.78	81103	440.683	4
21153	KY	Magoffin County	3	74	94	171	107	3	3	161.855	13186	309.437	9
21155	KY	Marion County	2	91	373	466	142	2	2	209.861	18933	346.393	6
21157	KY	Marshall County	10	213	590	813	317	11	11	483.526	31258	304.885	7
21159	KY	Martin County	3	70	134	207	100	3	3	142.906	11644	230.7	8
21161	KY	Mason County	11	119	541	671	200	11	11	179.574	17190	241.109	6
21163	KY	Meade County	12	125	359	496	184	13	13	278.982	27270	308.505	1
21165	KY	Menifee County	0	30	43	73	49	0	0	52.2192	6764	203.898	9
21167	KY	Mercer County	3	93	418	514	135	3	3	234.269	21814	250.916	6
21169	KY	Metcalfe County	4	69	134	207	102	5	5	125.965	10268	290.895	9
21171	KY	Monroe County	3	39	134	176	71	3	3	68.0599	11663	330.808	9
21173	KY	Montgomery County	8	147	606	761	235	10	10	344.337	25228	198.591	6
21175	KY	Morgan County	6	111	169	286	150	6	6	142.067	14236	381.262	7
21177	KY	Muhlenberg County	8	194	589	791	299	8	8	306.688	31341	474.719	6
21179	KY	Nelson County	11	211	907	1129	315	11	11	463.484	42517	422.627	1
21181	KY	Nicholas County	4	37	94	135	54	4	4	71.5793	6889	196.609	8
21183	KY	Ohio County	5	141	424	570	220	6	6	222.83	23560	593.789	6
21185	KY	Oldham County	7	190	687	884	282	7	7	535.007	55935	189.188	1
21187	KY	Owen County	6	70	147	223	108	6	6	139.785	11390	352.14	8
21189	KY	Owsley County	2	27	42	71	48	2	2	35.6599	4613	198.091	9
21191	KY	Pendleton County	6	89	277	372	123	7	7	184.752	15058	280.535	1
21193	KY	Perry County	12	220	621	853	362	12	12	286.415	29213	342.15	7
21195	KY	Pike County	20	584	1281	1885	938	20	20	782.432	65544	787.689	7
21197	KY	Powell County	3	44	100	147	57	3	3	133.668	13811	180.135	6
21199	KY	Pulaski County	14	349	1378	1741	548	15	15	676.985	60148	661.604	5
21201	KY	Robertson County	0	8	9	17	11	0	0	22.879	2202	100.069	8
21203	KY	Rockcastle County	2	106	283	391	173	2	2	452.973	16687	317.526	7
21205	KY	Rowan County	6	175	582	763	255	7	7	422.109	22559	280.822	7
21207	KY	Russell County	7	75	240	322	114	7	7	178.015	17140	253.531	9
21209	KY	Scott County	9	332	1054	1395	478	9	9	787.39	42954	284.722	2
21211	KY	Shelby County	7	226	900	1133	337	7	7	600.65	40458	384.19	1
21213	KY	Simpson County	5	116	463	584	169	5	5	272.069	17070	236.189	6
21215	KY	Spencer County	2	38	134	174	56	2	2	130.037	16837	185.902	1
21217	KY	Taylor County	7	118	513	638	179	7	7	247.968	23917	269.829	7
21219	KY	Todd County	8	63	159	230	96	8	8	147.789	12044	376.353	8
21221	KY	Trigg County	2	88	213	303	120	2	2	267.548	13401	443.12	3
21223	KY	Trimble County	4	39	116	159	59	4	4	74.6964	8983	148.849	1
21225	KY	Union County	2	97	235	334	139	2	2	127.409	15092	345.098	6
21227	KY	Warren County	12	739	3262	4013	1120	13	13	738.82	104023	545.211	3
21229	KY	Washington County	7	60	199	266	98	10	10	141.793	11558	300.593	8
21231	KY	Wayne County	5	89	252	346	139	5	5	164.681	20637	459.398	7
21233	KY	Webster County	4	40	120	164	60	4	5	137.91	13890	334.752	2
21235	KY	Whitley County	10	239	614	863	363	12	12	763.988	38342	440.154	7
21237	KY	Wolfe County	3	48	110	161	79	3	3	86.4353	7043	222.783	9
21239	KY	Woodford County	3	122	592	717	168	3	3	339.675	24314	190.678	2
22001	LA	Acadia Parish	13	665	988	1661	1233	14	14	763.847	59958	655.283	4
22003	LA	Allen Parish	6	149	196	351	258	6	6	269.741	25524	764.498	6
22005	LA	Ascension Parish	22	1183	2376	3581	1942	22	22	910.356	99056	291.529	2
22007	LA	Assumption Parish	2	200	300	502	361	2	2	205.145	22991	338.682	6
22009	LA	Avoyelles Parish	10	406	506	922	715	11	11	405.495	42169	832.437	6
22011	LA	Beauregard Parish	6	285	520	811	440	8	8	373.688	34776	1160.09	6
22013	LA	Bienville Parish	5	109	120	234	162	6	6	293.72	14907	810.639	6
22015	LA	Bossier Parish	15	1179	2668	3862	1795	17	18	1061.71	108705	839.251	2
22017	LA	Caddo Parish	45	3052	6979	10074	4855	53	53	2896.13	252609	881.993	2
22019	LA	Calcasieu Parish	37	2701	5253	7989	4575	37	37	2166.43	184512	1071.12	3
22021	LA	Caldwell Parish	4	54	23	81	91	4	4	131.558	10307	529.417	8
22023	LA	Cameron Parish	9	69	143	221	88	11	11	70.8296	7414	1312.96	3
22025	LA	Catahoula Parish	5	61	60	126	86	8	8	103.483	10452	703.649	9
22027	LA	Claiborne Parish	7	71	88	166	112	8	8	123.401	16283	754.653	7
22029	LA	Concordia Parish	6	103	133	242	183	6	6	118.262	19058	695.91	7
22031	LA	De Soto Parish	11	240	436	687	385	12	12	661.302	26269	877.2	2
22033	LA	East Baton Rouge Parish	56	6109	16325	22489	9914	62	62	4149.3	430317	455.428	2
22035	LA	East Carroll Parish	3	27	25	55	75	3	3	70.0896	8302	421.44	7
22037	LA	East Feliciana Parish	5	37	41	83	78	5	5	223.607	20833	453.402	2
22039	LA	Evangeline Parish	4	306	438	748	595	5	5	335.678	35905	664.272	6
22041	LA	Franklin Parish	5	33	14	52	66	5	5	214.799	20060	623.612	7
22043	LA	Grant Parish	7	126	90	223	209	8	8	252.156	19758	645.114	3
22045	LA	Iberia Parish	18	799	1757	2574	1396	19	17	616.256	74965	575.13	4
22047	LA	Iberville Parish	12	381	521	914	627	14	14	407.615	32501	618.642	2
22049	LA	Jackson Parish	2	57	82	141	110	2	2	114.773	15139	569.753	6
22051	LA	Jefferson Parish	45	4323	14733	19099	6540	46	44	2630.04	423520	306.517	1
22053	LA	Jefferson Davis Parish	13	343	631	986	573	13	13	526.956	31177	652.311	6
22055	LA	Lafayette Parish	38	3059	8589	11685	4744	39	39	2034.43	204843	269.835	3
22057	LA	Lafourche Parish	25	1082	2179	3286	1764	28	28	910.61	92713	1084.68	3
22059	LA	La Salle Parish	4	119	103	226	201	5	5	103.432	14041	623.826	6
22061	LA	Lincoln Parish	11	445	836	1292	736	11	11	578.835	42562	471.377	4
22063	LA	Livingston Parish	25	1156	2078	3259	1895	31	31	1209.67	116580	648.022	2
22065	LA	Madison Parish	6	44	76	126	81	10	10	443.363	11858	624.086	7
22067	LA	Morehouse Parish	9	285	314	608	522	10	10	265.843	28783	794.248	6
22069	LA	Natchitoches Parish	15	456	808	1279	776	16	16	927.966	39485	1255.45	6
22071	LA	Orleans Parish	39	3898	10002	13938	6526	41	41	2883.21	239124	180.556	1
22073	LA	Ouachita Parish	19	1632	3322	4971	2618	21	21	1706.7	149502	610.529	3
22075	LA	Plaquemines Parish	5	176	409	590	293	5	5	143.101	21540	844.56	1
22077	LA	Pointe Coupee Parish	10	264	329	603	466	10	10	206.201	22392	557.343	2
22079	LA	Rapides Parish	22	1578	3428	5028	2535	23	23	1726.28	130079	1322.54	3
22081	LA	Red River Parish	1	44	33	78	67	1	1	64.7898	9195	389.288	6
22083	LA	Richland Parish	5	105	119	229	170	6	6	451.121	20469	558.455	6
22085	LA	Sabine Parish	9	117	97	223	176	10	10	207.443	23683	865.265	6
22087	LA	St. Bernard Parish	5	236	601	841	397	6	6	240.018	19826	465.04	1
22089	LA	St. Charles Parish	16	578	1327	1921	933	17	19	551.507	52044	283.641	1
22091	LA	St. Helena Parish	8	68	87	163	119	8	8	101.498	10620	408.362	2
22093	LA	St. James Parish	7	234	444	685	403	9	9	197.368	21578	246.132	6
22095	LA	St. John the Baptist Parish	9	549	1187	1744	1000	9	9	649.529	47684	218.895	1
22097	LA	St. Landry Parish	24	942	1851	2817	1575	28	28	1254.94	91362	928.65	4
22099	LA	St. Martin Parish	11	523	1126	1648	862	16	18	655.605	51651	739.853	3
22101	LA	St. Mary Parish	15	565	1052	1632	994	15	15	383.517	51311	612.795	4
22103	LA	St. Tammany Parish	44	1675	4708	6427	2671	50	50	1824.62	226625	854.152	1
22105	LA	Tangipahoa Parish	37	1500	2986	4521	2603	40	40	1544.83	115398	790.245	4
22107	LA	Tensas Parish	0	16	24	40	31	0	0	58.0882	5865	602.483	9
22109	LA	Terrebonne Parish	27	1398	2995	4417	2370	34	34	1114.49	108424	1254.93	3
22111	LA	Union Parish	6	124	141	271	189	7	7	250.956	22773	877.602	3
22113	LA	Vermilion Parish	14	625	1177	1816	1031	14	14	446.665	55691	1173.78	4
22115	LA	Vernon Parish	12	342	587	941	535	13	13	433.866	47380	1328.41	4
22117	LA	Washington Parish	8	353	508	868	571	8	8	458.273	44920	669.569	6
22119	LA	Webster Parish	9	319	670	998	519	11	10	482.539	40924	595.223	6
22121	LA	West Baton Rouge Parish	16	407	735	1158	751	16	16	303.896	22625	191.203	2
22123	LA	West Carroll Parish	2	31	29	62	65	2	2	110.409	11553	359.398	9
22125	LA	West Feliciana Parish	6	66	103	175	112	7	7	192.875	15113	406.005	2
22127	LA	Winn Parish	8	90	51	149	136	9	9	160.476	15521	950.486	6
23001	ME	Androscoggin County							11	911.329	106815	470.274	3
23003	ME	Aroostook County							17	722.711	72047	6671.54	7
23005	ME	Cumberland County							27	3378.52	275374	835.509	2
23007	ME	Franklin County							5	338.922	29927	1697.81	6
23009	ME	Hancock County							14	737.367	53278	1587.7	6
23011	ME	Kennebec County							14	1372.33	120839	867.582	4
23013	ME	Knox County							4	371.564	40781	365.672	7
23015	ME	Lincoln County							8	393.034	34800	455.995	8
23017	ME	Oxford County							5	566.954	56734	2078	6
23019	ME	Penobscot County							18	1751.35	148784	3395.73	3
23021	ME	Piscataquis County							1	180.747	17180	3966.22	8
23023	ME	Sagadahoc County							5	449.704	36387	253.899	2
23025	ME	Somerset County							14	659.933	51658	3926.5	6
23027	ME	Waldo County							6	422.047	38511	729.729	6
23029	ME	Washington County							8	407.08	32751	2568.48	7
23031	ME	York County							26	2241.89	201341	990.916	2
24001	MD	Allegany County	7	286	493	786	443	8	8	857.762	72594	425.419	3
24003	MD	Anne Arundel County	43	2966	5841	8850	4277	48	48	5839.21	512154	415.938	1
24005	MD	Baltimore County	67	5310	10342	15719	7920	72	72	8281.92	788994	598.587	1
24009	MD	Calvert County	14	535	675	1224	780	17	17	789.553	88223	215.174	1
24011	MD	Caroline County	6	185	246	437	258	6	5	410.997	32910	320.141	6
24013	MD	Carroll County	18	821	1329	2168	1247	21	21	1315.53	169220	449.125	1
24015	MD	Cecil County	20	746	936	1702	1154	22	22	1278.2	99695	348.134	1
24017	MD	Charles County	19	1004	1750	2773	1449	23	23	1335.04	140444	461.001	1
24019	MD	Dorchester County	2	207	262	471	299	2	3	420.616	31846	557.54	6
24021	MD	Frederick County	20	1249	1805	3074	1835	25	25	3057.82	224705	662.875	1
24023	MD	Garrett County	6	201	376	583	331	8	8	585.834	29627	647.956	6
24025	MD	Harford County	28	1332	2028	3388	1983	30	29	2332.22	239993	440.349	1
24027	MD	Howard County	17	1283	2079	3379	1810	20	20	3798.35	273669	252.039	1
24029	MD	Kent County	6	98	120	224	134	8	8	239.897	19987	279.434	6
24031	MD	Montgomery County	47	4895	7518	12460	6905	49	48	7475.95	930813	495.516	1
24033	MD	Prince George's County	121	5152	9787	15060	7771	126	125	8857.43	828770	485.432	1
24035	MD	Queen Anne's County	11	265	440	716	398	12	12	990.835	46571	372.205	1
24037	MD	St. Mary's County	1	592	753	1354	918	10	10	857.45	100378	361.251	4
24039	MD	Somerset County	9	144	221	366	240	1	1	312.659	26016	327.215	3
24041	MD	Talbot County	9	306	546	861	474	11	12	623.763	36193	269.138	6
24043	MD	Washington County	19	985	1679	2683	1411	21	21	2109.43	145113	458.136	3
24045	MD	Wicomico County	17	772	1209	1998	1213	18	18	938.977	93600	377.171	3
24047	MD	Worcester County	10	490	773	1273	712	11	11	677.719	49374	473.237	4
24510	MD	Baltimore city	41	5043	14310	19394	7767	46	47	3642.07	637455	80.8044	1
25001	MA	Barnstable County							30	3850.2	222175	395.514	3
25003	MA	Berkshire County							10	1382.08	129798	931.317	3
25005	MA	Bristol County							52	2826.2	543024	555.996	1
25007	MA	Dukes County								61.5875	15485	103.779	7
25009	MA	Essex County							40	4386.47	733101	500.667	1
25011	MA	Franklin County							10	878.282	71602	702.028	2
25013	MA	Hampden County							38	3650.71	457908	618.404	2
25015	MA	Hampshire County							10	1312.41	153147	529.029	2
25017	MA	Middlesex County							61	13719.3	1473416	823.458	1
25019	MA	Nantucket County							1	25.9159	10531	47.8098	7
25021	MA	Norfolk County							37	9948.09	654909	399.583	1
25023	MA	Plymouth County							42	2662.66	490258	660.851	1
25025	MA	Suffolk County							39	4198.25	713049	58.516	1
25027	MA	Worcester County							64	8407.38	781352	1513.06	2
26001	MI	Alcona County	1	54	585	640	74	1	1	134.478	11538	674.434	9
26003	MI	Alger County	2	57	319	378	73	4	4	99.4911	9612	917.831	9
26005	MI	Allegan County	16	617	3022	3655	796	20	20	1161.52	112761	827.465	4
26007	MI	Alpena County	4	138	797	939	184	4	4	302.619	29707	574.15	7
26009	MI	Antrim County	3	127	927	1057	173	4	4	265.266	24299	476.937	9
26011	MI	Arenac County	2	149	727	878	189	2	2	244.167	16608	366.842	8
26013	MI	Baraga County	0	50	357	407	64	0	0	106.225	8544	903.997	9
26015	MI	Barry County	8	306	1768	2082	416	9	9	425.649	59188	556.135	2
26017	MI	Bay County	10	619	2444	3073	836	10	10	1368.13	107517	444.246	3
26019	MI	Benzie County	3	81	524	608	100	3	3	181.923	17510	321.313	9
26021	MI	Berrien County	25	998	4125	5148	1400	26	26	1918.28	159589	571	3
26023	MI	Branch County	8	256	1634	1898	351	8	8	428.692	46194	507.412	6
26025	MI	Calhoun County	18	742	4792	5552	997	21	21	1706.09	136615	708.716	3
26027	MI	Cass County	8	306	1578	1892	396	9	9	448.505	50551	492.179	2
26029	MI	Charlevoix County	3	140	1055	1198	185	3	3	205.597	26181	416.84	7
26031	MI	Cheboygan County	3	177	898	1078	229	3	3	317.502	26768	715.599	7
26033	MI	Chippewa County	4	201	1051	1256	287	5	5	346.118	38922	1561.06	5
26035	MI	Clare County	8	175	1125	1308	238	8	8	307.088	30697	566.796	7
26037	MI	Clinton County	8	381	2363	2752	549	9	9	1069.35	69755	571.458	2
26039	MI	Crawford County	6	94	600	700	134	7	7	231.889	14550	558.123	7
26041	MI	Delta County	1	227	1550	1778	329	1	1	405.713	37367	1170.03	5
26043	MI	Dickinson County	2	110	965	1077	147	3	3	214.233	26937	766.337	5
26045	MI	Eaton County	14	647	3410	4071	883	15	15	1317.21	107390	576.41	2
26047	MI	Emmet County	3	191	1268	1462	258	3	3	302.715	33393	467.82	7
26049	MI	Genesee County	55	2801	9132	11988	3905	57	57	5251.17	434715	639.64	2
26051	MI	Gladwin County	2	104	759	865	148	2	2	199.903	26287	506.803	6
26053	MI	Gogebic County	2	58	273	333	85	2	2	140.001	16287	1101.86	7
26055	MI	Grand Traverse County	11	570	2836	3417	798	14	14	807.413	85479	465.071	5
26057	MI	Gratiot County	4	234	1595	1833	335	7	7	502.614	42141	570.128	6
26059	MI	Hillsdale County	4	260	1649	1913	353	4	4	378.602	46781	598.843	6
26061	MI	Houghton County	7	169	1042	1218	225	7	7	225.032	35201	1011.72	5
26063	MI	Huron County	3	167	1634	1804	238	3	3	258.483	33290	836.517	7
26065	MI	Ingham County	16	1748	8395	10159	2249	18	18	2590.72	279295	559.188	2
26067	MI	Ionia County	6	317	2252	2575	423	6	6	674.632	64053	573.214	2
26069	MI	Iosco County	1	115	795	911	155	1	1	251.081	26255	549.112	7
26071	MI	Iron County	2	66	561	629	81	3	3	115.584	12151	1166.36	7
26073	MI	Isabella County	5	408	2519	2932	593	6	6	576.921	66693	574.273	5
26075	MI	Jackson County	23	1005	5133	6161	1282	24	24	1568.12	163006	706.597	3
26077	MI	Kalamazoo County	24	1552	7295	8871	2054	27	27	2681.46	245333	561.864	2
26079	MI	Kalkaska County	3	142	576	721	194	3	3	175.202	17188	561.016	7
26081	MI	Kent County	62	3970	16099	20131	5303	68	68	6608.84	604330	856.175	2
26083	MI	Keweenaw County	4	22	76	102	28	4	4	31.583	2151	540.975	9
26085	MI	Lake County	4	52	416	472	60	4	4	104.099	11153	567.435	8
26087	MI	Lapeer County	11	480	2780	3271	682	15	15	788.778	92012	654.204	1
26089	MI	Leelanau County	3	72	577	652	103	3	3	257.065	21898	348.469	9
26091	MI	Lenawee County	5	531	2221	2757	764	5	5	898.05	101243	750.502	4
26093	MI	Livingston County	19	984	4398	5401	1296	21	21	1949.94	183194	568.398	1
26095	MI	Luce County	2	43	183	228	57	2	2	57.9566	6728	903.083	7
26097	MI	Mackinac County	2	87	520	609	124	2	2	256.615	10877	1021.58	7
26099	MI	Macomb County	49	5043	18706	23798	6806	51	52	6835.7	831077	480.438	1
26101	MI	Manistee County	6	132	802	940	195	7	7	223.767	24803	543.608	7
26103	MI	Marquette County	4	372	1737	2113	522	5	5	647.08	65216	1821.05	5
26105	MI	Mason County	3	190	1390	1583	270	4	4	239.552	28750	495.167	7
26107	MI	Mecosta County	5	224	1894	2123	300	5	5	380.968	42090	555.693	6
26109	MI	Menominee County	1	163	1112	1276	215	1	1	227.918	24249	1043.52	7
26111	MI	Midland County	8	508	2209	2725	722	9	9	878.893	82818	521.194	4
26113	MI	Missaukee County	0	86	628	714	114	0		132.006	14976	566.746	9
26115	MI	Monroe County	23	870	3157	4050	1218	26	26	2027.14	153608	551.1	3
26117	MI	Montcalm County	15	375	2404	2794	525	19	19	564.927	62950	708.04	6
26119	MI	Montmorency County	3	51	315	369	75	3	3	70.236	10327	547.627	9
26121	MI	Muskegon County	23	1142	3951	5116	1562	26	26	1788.8	174386	509.117	3
26123	MI	Newaygo County	10	287	1456	1753	395	11	11	334.034	49171	842.368	2
26125	MI	Oakland County	48	7521	30212	37781	9852	49	49	13763.2	1206089	872.511	1
26127	MI	Oceana County	2	170	867	1039	220	2	2	203.575	27800	540.458	8
26129	MI	Ogemaw County	4	145	855	1004	215	5	5	234.177	21338	564.304	9
26131	MI	Ontonagon County	2	34	382	418	50	2	2	97.1499	6977	1311.53	9
26133	MI	Osceola County	4	162	1080	1246	230	4	4	273.546	23148	565.982	7
26135	MI	Oscoda County	3	44	255	302	59	4	4	82.0591	8938	565.002	9
26137	MI	Otsego County	4	164	700	868	228	4	4	202.969	24223	514.542	7
26139	MI	Ottawa County	18	1319	6082	7419	1779	20	20	2187.64	259206	565.654	3
26141	MI	Presque Isle County	0	52	482	534	59	0	0	159.133	13852	660.073	7
26143	MI	Roscommon County	1	123	730	854	173	1	1	321.346	25517	521.4	7
26145	MI	Saginaw County	26	1094	5189	6309	1583	27	27	2238.09	202268	808.932	3
26147	MI	St. Clair County	17	898	3510	4425	1214	17	17	1427.59	170119	724.371	1
26149	MI	St. Joseph County	9	349	1741	2099	458	13	13	550.516	62449	503.722	4
26151	MI	Sanilac County	12	200	1662	1874	304	15	15	309.309	43640	963.798	6
26153	MI	Schoolcraft County	3	48	456	507	69	4	4	124.206	8518	1178.11	7
26155	MI	Shiawassee County	10	372	2120	2502	499	10	10	732.206	71753	538.734	4
26157	MI	Tuscola County	5	303	1650	1958	395	5	6	472.047	56805	812.429	6
26159	MI	Van Buren County	23	467	2200	2690	667	24	24	768.712	77931	610.861	2
26161	MI	Washtenaw County	29	2214	8544	10787	2947	29	29	4493.55	350003	709.939	2
26163	MI	Wayne County	170	11397	42306	53873	15500	189	190	19965.1	1985101	614.152	1
26165	MI	Wexford County	7	231	1253	1491	333	7	7	352.721	31792	565.493	7
27001	MN	Aitkin County	2	79	114	195	96	2	2	246.774	15910	1819.3	8
27003	MN	Anoka County	17	1410	2586	4013	2063	17	16	2690.77	326252	423.606	1
27005	MN	Becker County	5	120	169	294	203	5	5	389.653	31964	1310.42	6
27007	MN	Beltrami County	4	159	365	528	250	4	4	454.416	43609	2505.27	7
27009	MN	Benton County	4	200	418	622	313	4	4	535.787	39504	408.276	3
27011	MN	Big Stone County	1	18	43	62	33	1	1	60.6528	5385	496.947	9
27013	MN	Blue Earth County	3	380	980	1363	493	3	3	639.331	59802	752.358	5
27015	MN	Brown County	3	107	210	320	147	3	3	236.356	26013	610.864	7
27017	MN	Carlton County	3	135	196	334	191	3	3	521.542	33893	860.33	2
27019	MN	Carver County	11	353	877	1241	497	13	13	692.174	88459	357.042	1
27021	MN	Cass County	6	123	218	347	185	7	7	434.708	28723	2017.6	9
27023	MN	Chippewa County	1	45	72	118	68	2	2	155.125	12465	582.802	7
27025	MN	Chisago County	8	250	407	665	366	8	9	755.81	50128	417.631	1
27027	MN	Clay County	5	221	562	788	292	6	6	665.028	54835	1045.24	3
27029	MN	Clearwater County	1	29	56	86	39	1	1	116.648	8245	994.71	8
27031	MN	Cook County	2	24	64	90	36	2	2	137.156	5398	1450.6	9
27033	MN	Cottonwood County	3	34	76	113	56	3	3	128.968	11349	639.994	7
27035	MN	Crow Wing County	11	286	472	769	443	11	11	805.371	61648	996.568	5
27037	MN	Dakota County	25	1571	3358	4954	2152	26	26	3505.08	390478	569.582	1
27039	MN	Dodge County	2	65	151	218	107	2	2	210.171	19552	439.504	3
27041	MN	Douglas County	8	205	450	663	275	9	9	512.956	36075	634.322	7
27043	MN	Faribault County	5	59	129	193	93	5	5	225.317	14869	713.63	7
27045	MN	Fillmore County	0	73	163	236	92	0	0	218.997	21037	861.252	8
27047	MN	Freeborn County	3	140	388	531	185	4	4	561.648	31257	707.641	7
27049	MN	Goodhue County	10	209	574	793	315	12	12	635.113	45839	758.27	4
27051	MN	Grant County	1	23	38	62	35	1	1	114.336	6021	546.405	9
27053	MN	Hennepin County	38	6937	15362	22337	9510	52	50	10937.5	1136599	556.617	1
27055	MN	Houston County	0	65	210	275	91	0	0	178.485	19515	558.406	3
27057	MN	Hubbard County	3	91	94	188	132	3	3	243.193	18781	922.455	7
27059	MN	Isanti County	5	170	255	430	251	8	8	355.849	38921	439.068	1
27061	MN	Itasca County	10	226	338	574	355	10	10	495.006	44542	2665.06	6
27063	MN	Jackson County	1	49	97	147	65	1	1	233.098	10883	701.692	7
27065	MN	Kanabec County	2	87	107	196	127	2	2	182.196	16090	524.931	6
27067	MN	Kandiyohi County	4	241	431	676	397	4	4	464.893	40784	796.058	4
27069	MN	Kittson County	2	10	25	37	14	2	2	69.0413	4505	1097.08	9
27071	MN	Koochiching County	2	50	94	146	64	2	2	141.626	13459	3102.36	7
27073	MN	Lac qui Parle County	0	17	37	54	22	0	0	93.5998	7258	764.865	9
27075	MN	Lake County	3	45	92	140	63	3	3	167.441	10741	2099.16	6
27077	MN	Lake of the Woods County	1	12	22	35	16	1	1	47.8081	4095	1296.7	9
27079	MN	Le Sueur County	1	131	276	408	193	3	3	278.493	28034	448.499	6
27081	MN	Lincoln County	3	18	70	91	29	3	3	68.8657	5877	537.03	9
27083	MN	Lyon County	2	103	228	333	157	2	2	265.739	24695	714.174	7
27085	MN	McLeod County	2	150	399	551	210	2	2	359.132	37220	491.908	6
27087	MN	Mahnomen County	2	19	19	40	29	3	3	74.3762	5129	556.14	8
27089	MN	Marshall County	1	31	36	68	44	1	1	145.577	9618	1772.24	8
27091	MN	Martin County	4	110	232	346	174	4	4	299.369	20462	709.345	7
27093	MN	Meeker County	1	86	142	229	130	1	1	247.677	23211	608.541	6
27095	MN	Mille Lacs County	4	89	163	256	136	6	6	436.419	26354	574.466	6
27097	MN	Morrison County	4	132	225	361	186	4	4	487.043	32733	1124.5	6
27099	MN	Mower County	2	156	391	549	204	2	2	425.133	38040	711.498	4
27101	MN	Murray County	3	28	43	74	41	3	3	97.3176	8511	704.43	9
27103	MN	Nicollet County	4	133	327	464	180	4	4	358.267	31680	452.293	5
27105	MN	Nobles County	3	103	213	319	159	4	4	301.715	20128	715.386	7
27107	MN	Norman County	1	26	30	57	40	1	1	91.6313	6685	876.27	8
27109	MN	Olmsted County	13	692	1482	2187	997	14	14	1384.42	139747	653.01	3
27111	MN	Otter Tail County	7	192	469	668	275	7	7	708.527	57031	1979.71	6
27113	MN	Pennington County	1	74	104	179	98	1	1	140.089	13756	616.542	6
27115	MN	Pine County	6	151	150	307	237	6	6	565.116	28164	1411.04	6
27117	MN	Pipestone County	4	49	86	139	69	4	4	103.935	9305	465.886	6
27119	MN	Polk County	7	101	227	335	152	7	7	395.78	30708	1970.37	3
27121	MN	Pope County	2	39	75	116	59	2	2	132.574	11065	670.136	8
27123	MN	Ramsey County	20	2773	8958	11751	3818	21	23	4864.85	499891	155.777	1
27125	MN	Red Lake County	2	5	13	20	7	2	2	49.714	4118	432.431	8
27127	MN	Redwood County	4	69	81	154	116	4	4	208.691	15519	879.726	7
27129	MN	Renville County	4	60	81	145	98	4	4	222.558	16132	982.92	9
27131	MN	Rice County	4	233	403	640	336	4	4	726.212	61955	497.569	4
27133	MN	Rock County	4	41	106	151	65	4	4	175.56	9498	482.61	6
27135	MN	Roseau County	2	39	61	102	62	2	2	158.73	15946	1662.51	7
27137	MN	St. Louis County	23	992	2441	3456	1409	23	23	2112.94	196694	6225.16	2
27139	MN	Scott County	14	495	882	1391	717	19	19	1226.14	126642	356.676	1
27141	MN	Sherburne County	10	308	804	1122	452	10	10	980.866	86287	436.301	1
27143	MN	Sibley County	1	47	102	150	61	1	1	183.369	15007	588.649	8
27145	MN	Stearns County	10	843	1697	2550	1176	10	10	1758	146051	1344.52	3
27147	MN	Steele County	7	158	328	493	227	7	7	506.034	36378	429.548	5
27149	MN	Stevens County	2	30	60	92	41	3	3	95.2865	9624	562.064	7
27151	MN	Swift County	3	31	51	85	41	3	3	120.414	11192	743.53	7
27153	MN	Todd County	3	72	140	215	110	3	3	275.904	24029	942.019	6
27155	MN	Traverse County	0	15	19	34	16	0	0	43.1077	3712	574.088	9
27157	MN	Wabasha County	2	99	169	270	145	2	2	189.367	21783	525.008	3
27159	MN	Wadena County	1	49	84	134	69	1	1	146.424	13382	535.017	7
27161	MN	Waseca County	4	77	145	226	119	4	4	187.82	19528	423.251	7
27163	MN	Washington County	16	862	1976	2854	1218	20	20	2112.19	226475	391.704	1
27165	MN	Watonwan County	3	42	101	146	64	3	3	177.52	11022	434.514	7
27167	MN	Wilkin County	6	24	63	93	36	6	6	151.727	6418	751.431	6
27169	MN	Winona County	5	250	619	874	355	6	6	607.137	49802	626.303	4
27171	MN	Wright County	19	403	939	1361	583	20	20	1338.15	117372	660.754	1
27173	MN	Yellow Medicine County	2	30	51	83	46	2	2	128.294	10128	757.955	9
28001	MS	Adams County							7	333.186	31710	460.261	5
28003	MS	Alcorn County							7	471.611	35609	399.893	7
28005	MS	Amite County							2	227.845	13345	729.6	8
28007	MS	Attala County							6	295.445	19600	735.126	6
28009	MS	Benton County							4	192.703	8037	406.789	8
28011	MS	Bolivar County							3	412.464	37635	876.284	5
28013	MS	Calhoun County							4	198.096	14591	586.538	7
28015	MS	Carroll County							8	278.198	10304	627.733	9
28017	MS	Chickasaw County							8	258.766	18974	501.558	7
28019	MS	Choctaw County							2	148.601	9052	419.1	9
28021	MS	Claiborne County							3	121.035	10999	486.767	6
28023	MS	Clarke County							4	261.363	17414	691.267	9
28025	MS	Clay County							4	222.011	20969	408.56	7
28027	MS	Coahoma County							4	325.321	27543	554.152	5
28029	MS	Copiah County							15	503.287	29317	776.602	2
28031	MS	Covington County							12	413.304	20361	413.79	8
28033	MS	DeSoto County							35	1936.3	149393	477.862	1
28035	MS	Forrest County							26	932.646	78241	466.577	3
28037	MS	Franklin County							2	173.191	8312	564.595	9
28039	MS	George County							16	256.904	21937	478.292	3
28041	MS	Greene County							5	188.758	13137	712.819	8
28043	MS	Grenada County							12	298.261	23076	421.792	7
28045	MS	Hancock County							18	665.609	39687	476.877	3
28047	MS	Harrison County							50	2397.34	176105	580.981	3
28049	MS	Hinds County							81	4139.78	249157	869.185	2
28051	MS	Holmes County							3	370.183	20461	756	6
28053	MS	Humphreys County							6	134.44	9994	418.089	7
28055	MS	Issaquena County							2	32.7181	1675	413.063	9
28057	MS	Itawamba County							9	350.061	23034	532.307	7
28059	MS	Jackson County							26	1824.9	130098	726.901	3
28061	MS	Jasper County							8	320.492	18071	676.005	9
28063	MS	Jefferson County							1	125.298	8960	519.387	7
28065	MS	Jefferson Davis County							6	179.12	12813	408.407	8
28067	MS	Jones County							24	988.88	66763	693.815	4
28069	MS	Kemper County							6	189.649	10109	766.133	9
28071	MS	Lafayette County							12	487.746	42716	631.114	6
28073	MS	Lamar County							10	638.427	47698	497.067	3
28075	MS	Lauderdale County							26	1257.71	77100	703.51	5
28077	MS	Lawrence County							4	160.61	13341	430.628	8
28079	MS	Leake County							10	325.188	22828	582.707	6
28081	MS	Lee County							25	1242.48	80349	449.589	5
28083	MS	Leflore County							16	377.704	35088	591.927	5
28085	MS	Lincoln County							16	579.682	34529	585.705	6
28087	MS	Lowndes County							10	676.253	59614	502.296	5
28089	MS	Madison County							14	1126.33	89387	717.111	2
28091	MS	Marion County							11	328.755	25735	542.343	6
28093	MS	Marshall County							24	644.862	36695	706.326	1
28095	MS	Monroe County							9	517.44	37078	764.174	7
28097	MS	Montgomery County							2	257.13	11491	406.845	7
28099	MS	Neshoba County							14	430.537	30236	569.998	7
28101	MS	Newton County							8	465.499	22329	578.033	7
28103	MS	Noxubee County							5	190.231	11874	694.788	7
28105	MS	Oktibbeha County							4	430.323	43898	457.71	5
28107	MS	Panola County							15	595.817	35408	684.197	6
28109	MS	Pearl River County							17	708.704	57071	811.33	6
28111	MS	Perry County							14	238.563	12205	647.177	3
28113	MS	Pike County							6	530.344	39798	408.889	7
28115	MS	Pontotoc County							4	384.021	28862	497.352	7
28117	MS	Prentiss County							14	332.435	25378	414.927	7
28119	MS	Quitman County							1	133.439	8910	404.838	6
28121	MS	Rankin County							26	2142.51	138362	774.516	2
28123	MS	Scott County							11	508.83	28895	609.083	6
28125	MS	Sharkey County							2	90.6538	5571	427.711	9
28127	MS	Simpson County							10	438.887	27824	588.731	2
28129	MS	Smith County							6	229.13	16009	635.887	8
28131	MS	Stone County							5	249.209	15731	445.366	3
28133	MS	Sunflower County							3	347.261	30964	693.79	5
28135	MS	Tallahatchie County							6	154.797	13260	643.922	7
28137	MS	Tate County							8	344.947	26910	404.479	1
28139	MS	Tippah County							8	276.326	21160	457.905	7
28141	MS	Tishomingo County							3	302.649	19053	424.124	8
28143	MS	Tunica County							7	315.567	10453	454.809	1
28145	MS	Union County							11	463.856	26907	415.431	7
28147	MS	Walthall County							6	201.044	15360	403.821	9
28149	MS	Warren County							13	670.359	48866	586.611	4
28151	MS	Washington County							9	579.71	55644	723.986	5
28153	MS	Wayne County							2	301.558	21096	810.324	7
28155	MS	Webster County							3	163.813	9789	422.493	9
28157	MS	Wilkinson County							3	145.266	10266	676.705	8
28159	MS	Winston County							8	255.981	19705	606.969	7
28161	MS	Yalobusha County							9	277.075	13672	467.12	7
28163	MS	Yazoo County							5	399.41	27187	919.482	6
29001	MO	Adair County	1	128	288	417		1	1	186.757	24642	567.005	7
29003	MO	Andrew County	2	110	223	335		3	3	332.827	16864	435.183	3
29005	MO	Atchison County	2	29	78	109		2	2	219.894	6108	544.718	9
29007	MO	Audrain County	0	151	362	513		0	0	248.265	25892	693.096	6
29009	MO	Barry County	7	252	509	768		7	7	332.349	36197	779.063	6
29011	MO	Barton County	3	63	192	258		4	4	198.349	12719	594.25	6
29013	MO	Bates County	1	75	220	296		1	1	262.276	17034	848.466	1
29015	MO	Benton County	8	131	240	379		8	8	217.047	18470	705.512	9
29017	MO	Bollinger County	2	86	138	226		2	2	107.635	12118	620.741	9
29019	MO	Boone County	22	872	3115	4009		23	23	1631.74	152435	685.43	3
29021	MO	Buchanan County	9	840	2301	3150		9	9	769.357	86485	409.73	3
29023	MO	Butler County	18	370	1073	1461		20	20	483.013	41326	697.539	7
29025	MO	Caldwell County	1	53	84	138		1	1	139.103	9284	429.341	1
29027	MO	Callaway County	6	292	854	1152		7	7	832.359	43428	838.836	3
29029	MO	Camden County	17	320	799	1136		19	19	409.605	40487	655.143	7
29031	MO	Cape Girardeau County	7	463	2280	2750		8	8	783.672	72740	578.619	5
29033	MO	Carroll County	2	53	114	169		2	2	108.811	9859	694.722	6
29035	MO	Carter County	5	39	77	121		5	5	117.033	5929	507.583	9
29037	MO	Cass County	7	452	1407	1866		9	9	972.805	97133	698.991	1
29039	MO	Cedar County	1	60	146	207		1	1	111.214	13729	475.933	6
29041	MO	Chariton County	2	36	83	121		2	2	84.2291	7843	755.871	9
29043	MO	Christian County	12	348	787	1147		13	13	666.813	73066	563.161	2
29045	MO	Clark County	2	36	94	132		2	2	117.029	7220	507.311	9
29047	MO	Clay County	22	1226	4114	5362		27	27	2052.91	211952	396.348	1
29049	MO	Clinton County	1	95	226	322		1	1	310.055	20894	418.762	1
29051	MO	Cole County	9	500	1320	1829		10	10	554.193	73698	391.444	3
29053	MO	Cooper County	1	150	450	601		1	1	480.539	17543	565.028	6
29055	MO	Crawford County	5	155	425	585		6	6	504.217	24076	742.518	6
29057	MO	Dade County	4	30	48	82		5	5	69.527	7523	490.341	8
29059	MO	Dallas County	0	83	153	236		0	0	176.857	16831	541.543	2
29061	MO	Daviess County	2	48	107	157		2	2	282.004	7963	566.967	8
29063	MO	DeKalb County	1	69	176	246		1	1	208.358	12234	424.199	3
29065	MO	Dent County	4	86	201	291		6	6	148.977	15063	753.539	7
29067	MO	Douglas County	3	65	110	178		3	3	110.815	13377	814.532	6
29069	MO	Dunklin County	5	222	403	630		6	6	312.828	31623	545.62	7
29071	MO	Franklin County	27	760	2281	3068		31	30	1276.95	100045	922.811	1
29073	MO	Gasconade County	7	82	262	351		7	7	135.629	15399	520.668	6
29075	MO	Gentry County	2	36	61	99		2	2	54.4973	6249	491.522	8
29077	MO	Greene County	26	2570	6091	8687		27	27	2555.24	263980	674.973	2
29079	MO	Grundy County	0	49	171	220		0	0	96.7677	10095	435.817	7
29081	MO	Harrison County	6	53	167	226		6	6	258.298	8861	725.129	7
29083	MO	Henry County	6	147	349	502		7	7	358.111	22398	702.484	6
29085	MO	Hickory County	1	48	58	107		1	1	98.0603	9123	398.628	8
29087	MO	Holt County	4	38	96	138		6	6	244.994	4963	461.866	8
29089	MO	Howard County	5	44	84	133		7	7	78.7548	9879	465.735	3
29091	MO	Howell County	11	246	645	902		13	14	449.233	38639	927.741	7
29093	MO	Iron County	6	72	98	176		6	6	97.7223	10013	551.339	6
29095	MO	Jackson County	66	5543	19265	24874		68	68	5225.56	666890	604.844	1
29097	MO	Jasper County	13	916	2407	3336		15	15	1159.02	115240	639.733	3
29099	MO	Jefferson County	36	1402	3734	5172		38	38	2243.84	216076	656.796	1
29101	MO	Johnson County	11	351	977	1339		15	15	573.081	51928	830.44	4
29103	MO	Knox County	2	12	26	40		3	3	50.8827	4058	505.707	9
29105	MO	Laclede County	13	284	763	1060		13	13	665.785	35391	765.854	6
29107	MO	Lafayette County	10	172	711	893		10	10	614.383	32677	629.312	1
29109	MO	Lawrence County	7	215	486	708		8	8	596.016	37650	613.076	6
29111	MO	Lewis County	4	39	115	158		6	6	130.797	10040	505.007	9
29113	MO	Lincoln County	9	246	650	905		12	12	502.984	51528	630.49	1
29115	MO	Linn County	1	57	164	22		1	1	129.255	12689	620.352	7
29117	MO	Livingston County	2	102	268	372		3	3	188.229	14196	534.523	6
29119	MO	McDonald County	10	199	300	509		12	12	263.026	22895	539.512	2
29121	MO	Macon County	4	90	227	321		4	4	242.149	15576	803.769	7
29123	MO	Madison County	5	82	141	228		6	6	128.798	12180	496.731	7
29125	MO	Maries County	6	58	118	182		7	7	127.777	9115	527.728	8
29127	MO	Marion County	10	186	765	961		10	10	474.349	28174	438.075	5
29129	MO	Mercer County	1	34	33	68		1	1	53.1064	3507	454.176	9
29131	MO	Miller County	13	169	426	608		13	13	314.834	24898	592.255	6
29133	MO	Mississippi County	4	71	144	219		4	4	240.576	13672	413.157	7
29135	MO	Moniteau County	5	76	191	272		5	5	130.346	15167	416.519	3
29137	MO	Monroe County	2	42	96	140		2	2	82.9781	9205	645.982	9
29139	MO	Montgomery County	5	112	258	375		5	5	415.295	11920	537.462	8
29141	MO	Morgan County	4	115	266	385		4	4	205.236	20820	597.412	8
29143	MO	New Madrid County	6	135	252	393		6	6	498.272	17779	678.011	7
29145	MO	Newton County	20	404	872	1296		22	22	818.202	56038	626.417	3
29147	MO	Nodaway County	4	90	345	439		4	4	191.641	22120	876.62	6
29149	MO	Oregon County	6	58	120	184		6	6	139.225	10304	791.403	9
29151	MO	Osage County	3	63	141	207		3	3	164.832	13393	606.107	3
29153	MO	Ozark County	0	58	111	169		0	0	104.997	9245	742.148	9
29155	MO	Pemiscot County	5	156	330	491		5	5	511.935	18780	493.078	7
29157	MO	Perry County	1	133	309	443		1	1	323.822	18794	474.668	7
29159	MO	Pettis County	12	359	1063	1434		12	12	449.799	40807	684.824	4
29161	MO	Phelps County	12	383	1209	1604		13	13	750.322	42550	672.852	5
29163	MO	Pike County	3	88	205	296		4	4	246.738	18471	672.823	6
29165	MO	Platte County	15	546	2044	2605		16	16	1115.11	84881	420.332	1
29167	MO	Polk County	6	156	374	536		7	7	398.722	30216	637.204	2
29169	MO	Pulaski County	15	241	801	1057		15	15	423.125	44326	547.02	5
29171	MO	Putnam County	2	31	58	91		3	3	51.6534	4913	517.897	9
29173	MO	Ralls County	6	72	131	209		6	6	194.449	9842	470.998	9
29175	MO	Randolph County	5	188	510	703		6	6	291.658	25590	482.319	6
29177	MO	Ray County	3	102	265	370		4	4	171.34	23482	569.465	1
29179	MO	Reynolds County	3	57	86	146		3	3	78.4517	6465	811.198	9
29181	MO	Ripley County	3	87	157	247		3	3	99.886	13551	629.466	9
29183	MO	St. Charles County	24	1794	6846	8664		25	25	3345.25	343952	560.421	1
29185	MO	St. Clair County	5	61	106	172		5	5	182.246	9428	676.656	8
29186	MO	Ste. Genevieve County	3	97	310	410		3	3	335.66	17841	502.389	6
29187	MO	St. Francois County	17	377	1066	1460		17	17	602.795	62810	449.464	4
29189	MO	St. Louis County	50	6525	22673	29248		55	55	15017	995118	507.805	1
29195	MO	Saline County	1	153	499	653		1	1	467.467	22701	755.55	6
29197	MO	Schuyler County	0	24	19	43		0	0	58.4106	4102	307.868	9
29199	MO	Scotland County	1	18	55	74		1	1	44.3588	4814	438.465	9
29201	MO	Scott County	4	219	660	883		4	4	556.223	40735	421.01	5
29203	MO	Shannon County	5	44	57	106		7	7	106.543	8431	1003.83	9
29205	MO	Shelby County	2	29	43	74		5	5	85.6999	6509	500.935	9
29207	MO	Stoddard County	4	192	347	543		5	5	353.174	29738	827.123	7
29209	MO	Stone County	6	236	321	563		7	7	325.947	31552	463.224	8
29211	MO	Sullivan County	3	40	71	114		3	3	60.4251	6675	650.949	9
29213	MO	Taney County	10	516	1251	1777		10	10	547.194	45721	632.356	6
29215	MO	Texas County	8	149	251	408		10	10	297.114	23321	1178.54	9
29217	MO	Vernon County	5	109	359	473		7	7	357.165	20000	833.953	7
29219	MO	Warren County	4	165	489	658		4	4	441.173	30467	431.314	1
29221	MO	Washington County	15	181	235	431		16	16	200.901	24317	759.594	1
29223	MO	Wayne County	7	102	180	289		8	8	166.642	12655	761.034	9
29225	MO	Webster County	6	161	437	604		6	6	664.758	35927	593.316	2
29227	MO	Worth County	0	7	25	32		0	0	16.9948	2098	266.52	9
29229	MO	Wright County	2	90	162	254		2	2	247.779	18276	682.126	6
29510	MO	St. Louis city	50	3579	12235	15864		57	57	3884.86	350759	61.9237	1
30001	MT	Beaverhead County	1			153	63	1	1	237.067	8804	5542.31	7
30003	MT	Big Horn County	9			159	96	11	11	324.028	12798	4994.81	6
30005	MT	Blaine County	3			65	42	4	4	98.4039	6550	4226.18	9
30007	MT	Broadwater County	4			129	72	4	4	81.7506	4590	1191.35	9
30009	MT	Carbon County	4			229	139	4	4	146.031	9721	2047.99	3
30011	MT	Carter County	0			9	2	0	0	19.0607	1268	3339.57	9
30013	MT	Cascade County	1			2173	764	13	13	716.018	81775	2697.9	3
30015	MT	Chouteau County	1			82	28	2	2	78.9179	5254	3973.24	8
30017	MT	Custer County	6			278	59	6	6	172.392	11188	3783.13	7
30019	MT	Daniels County	0			17	10	0	0	14.209	1650	1426.09	9
30021	MT	Dawson County	2			215	84	2	2	144.924	8558	2373.14	7
30023	MT	Deer Lodge County	2			104	75	2	2	85.1206	8852	736.978	7
30025	MT	Fallon County	0			22	2	0	0	23.2181	2696	1620.33	9
30027	MT	Fergus County	2			234	75	2	2	105.613	11181	4339.17	7
30029	MT	Flathead County	25			1989	935	26	26	875.607	86844	5098.34	5
30031	MT	Gallatin County	13			1976	648	14	15	925.333	87359	2605.84	5
30033	MT	Garfield County	1			7	7	1	1	18.2582	1215	4668.06	9
30035	MT	Glacier County	13			161	150	14	14	92.7041	13382	2994.72	7
30037	MT	Golden Valley County	1			23	15	1	1	16.9057	1125	1175.3	8
30039	MT	Granite County	2			90	51	2	2	88.957	2852	1727.44	8
30041	MT	Hill County	4			297	77	4	4	124.369	16568	2896.36	7
30043	MT	Jefferson County	7			310	130	8	8	379.309	11121	1656.64	9
30045	MT	Judith Basin County	2			61	54	4	4	30.7559	2048	1869.85	8
30047	MT	Lake County	8			492	310	10	10	363.529	28438	1493.77	6
30049	MT	Lewis and Clark County	10			1739	637	11	11	612.805	59998	3460.96	5
30051	MT	Liberty County	0			10	3	0	0	26.9958	1796	1429.76	9
30053	MT	Lincoln County	5			301	203	6	6	224.187	18885	3612.67	7
30055	MT	McCone County	0			18	10	0	0	25.8881	1724	2642.53	9
30057	MT	Madison County	5			172	84	6	6	80.9512	7426	3586.54	9
30059	MT	Meagher County	1			28	14	1	1	16.3747	1900	2391.82	9
30061	MT	Mineral County	7			313	142	7	7	205.631	3895	1219.82	8
30063	MT	Missoula County	23			2453	945	23	23	1001.22	105650	2597.97	3
30065	MT	Musselshell County	5			62	30	6	6	67.5019	4494	1867.15	8
30067	MT	Park County	5			457	141	6	6	231.664	16099	2802.41	7
30069	MT	Petroleum County	2			7	11	2	2	5.364	438	1653.9	9
30071	MT	Phillips County	3			64	34	4	4	59.3109	3948	5139.57	9
30073	MT	Pondera County	0			104	64	0	0	100.648	5943	1624.7	7
30075	MT	Powder River County	1			32	24	2	2	25.5217	1699	3297.18	9
30077	MT	Powell County	4			165	64	5	5	114.132	7118	2325.94	7
30079	MT	Prairie County	1			37	16	1	1	68.6003	1044	1736.55	9
30081	MT	Ravalli County	10			695	277	10	10	511.839	40396	2394.21	6
30083	MT	Richland County	3			236	90	4	4	68.2085	9182	2084.09	7
30085	MT	Roosevelt County	4			115	75	5	5	68.9098	10148	2355.6	7
30087	MT	Rosebud County	3			156	55	3	3	232.14	9182	5012.37	9
30089	MT	Sanders County	6			214	121	8	8	95.0122	11033	2762.17	8
30091	MT	Sheridan County	1			63	9	1	1	50.6564	3373	1676.58	9
30093	MT	Silver Bow County	3			658	209	3	3	301.599	32652	718.308	5
30095	MT	Stillwater County	3			242	97	4	4	160.053	8660	1795.09	8
30097	MT	Sweet Grass County	3			91	35	3	3	116.091	3807	1855.08	9
30099	MT	Teton County	3			108	48	3	3	99.8687	6023	2272.61	8
30101	MT	Toole County	0			85	24	0	0	134.063	5144	1910.95	7
30103	MT	Treasure County	1			31	13	1	1	62.555	651	978.864	8
30105	MT	Valley County	1			109	46	1	1	62.5268	6899	4921	7
30107	MT	Wheatland County	2			50	30	2	2	29.8081	1983	1423.09	9
30109	MT	Wibaux County	0			16	9	0	0	42.0092	898	889.313	9
30111	MT	Yellowstone County	13			3556	1618	13	13	1241.41	139936	2635.15	3
31001	NE	Adams County	5	203	430	638	285	5	5	252.886	32990	563.408	5
31003	NE	Antelope County	3	33	94	130	40	3	3	125.975	6757	857.06	9
31005	NE	Arthur County	1	3	7	11	4	1	1	4.0225	356	715.369	9
31007	NE	Banner County	1	8	7	16	10	1	1	9.7696	734	746.217	9
31009	NE	Blaine County	0	2	2	4	4	0	0	8.3566	448	710.743	9
31011	NE	Boone County	0	30	54	84	50	0	0	62.2522	5527	686.689	9
31013	NE	Box Butte County	1	59	146	206	77	1	1	91.0205	11001	1075.29	7
31015	NE	Boyd County	1	6	18	25	11	1	1	39.4995	2119	540.049	9
31017	NE	Brown County	0	18	35	53	22	0	0	59.7598	3207	1221.28	9
31019	NE	Buffalo County	9	297	668	974	421	11	11	665.043	44976	967.994	5
31021	NE	Burt County	1	29	53	83	48	1	1	131.616	7059	492.767	8
31023	NE	Butler County	3	31	75	109	48	4	4	112.135	8377	583.588	6
31025	NE	Cass County	4	129	276	409	186	4	4	446.793	25577	559.184	2
31027	NE	Cedar County	1	43	80	124	80	1	1	158.989	8530	740.226	9
31029	NE	Chase County	0	12	26	38	14	0	0	68.9666	3698	894.495	9
31031	NE	Cherry County	1	30	43	74	46	1	1	60.9114	5718	5960.52	7
31033	NE	Cheyenne County	3	63	114	180	91	3	3	368.747	9972	1196.34	7
31035	NE	Clay County	2	38	64	104	59	2	2	71.3225	6330	573.033	9
31037	NE	Colfax County	1	38	130	169	56	1	1	113.456	9974	413.143	7
31039	NE	Cuming County	0	60	84	144	80	0	0	116.901	9365	572.001	7
31041	NE	Custer County	2	55	151	208	77	3	3	144.284	10849	2575.71	7
31043	NE	Dakota County	4	110	199	313	160	4	4	190.04	20312	263.796	3
31045	NE	Dawes County	0	43	106	149	68	0	0	88.7948	8818	1396.24	7
31047	NE	Dawson County	5	126	325	456	189	5	5	465.287	24744	1012.92	7
31049	NE	Deuel County	1	25	40	66	35	1	1	240.074	1893	439.894	9
31051	NE	Dixon County	1	25	38	64	35	1	1	116.401	6243	476.386	3
31053	NE	Dodge County	4	265	378	647	384	5	5	307.566	36004	534.394	4
31055	NE	Douglas County	35	4265	6462	10762	6163	39	39	3945.81	497416	330.978	2
31057	NE	Dundy County	0	5	21	26	6	0	0	37.8556	2031	919.86	9
31059	NE	Fillmore County	0	27	45	72	34	0	0	112.8	6051	576.46	9
31061	NE	Franklin County	0	16	55	71	16	0	0	35.5665	3158	575.922	9
31063	NE	Frontier County	0	18	35	53	28	0	0	49.6406	2663	974.55	9
31065	NE	Furnas County	1	29	53	83	41	1	1	88.2355	4732	718.086	9
31067	NE	Gage County	4	154	340	498	202	4	4	246.831	23219	855.288	6
31069	NE	Garden County	1	11	37	49	23	1	1	24.4113	1834	1704.4	9
31071	NE	Garfield County	0	4	12	16	4	0	0	19.418	1722	570.028	9
31073	NE	Gosper County	0	15	35	50	20	0	0	22.198	1971	458.175	9
31075	NE	Grant County	0	6	7	13	7	0	0	7.8541	613	776.225	9
31077	NE	Greeley County	0	10	17	27	16	0	0	43.3519	2326	569.854	9
31079	NE	Hall County	4	445	883	1332	694	5	5	494.81	55642	546.397	5
31081	NE	Hamilton County	5	59	190	254	116	6	6	261.146	9298	543.676	7
31083	NE	Harlan County	1	22	47	70	39	1	1	63.2438	3392	552.783	9
31085	NE	Hayes County	1	7	13	21	11	1	1	13.0387	980	713.114	9
31087	NE	Hitchcock County	3	13	41	57	21	5	5	37.8414	2844	710.029	9
31089	NE	Holt County	1	41	106	148	66	1	1	133.63	10312	2412.66	7
31091	NE	Hooker County	0	3	8	11	5	0	0	9.3956	736	721.166	9
31093	NE	Howard County	2	36	79	117	62	2	2	123.256	6612	569.469	9
31095	NE	Jefferson County	1	27	181	209	36	1	1	70.4858	7516	573.015	7
31097	NE	Johnson County	2	23	39	64	41	2	2	83.4472	4476	376.131	8
31099	NE	Kearney County	2	36	72	110	47	2	2	73.0443	6602	516.029	7
31101	NE	Keith County	3	63	156	222	89	5	5	359.156	8024	1061.26	7
31103	NE	Keya Paha County	0	5	10	15	6	0	0	9.5624	850	773.287	9
31105	NE	Kimball County	2	24	65	91	38	2	2	262.517	3602	951.723	6
31107	NE	Knox County	3	23	56	82	39	3	3	97.6015	8665	1108.12	9
31109	NE	Lancaster County	22	2688	3850	6560	3814	24	24	2894.75	275665	838.881	2
31111	NE	Lincoln County	7	297	628	932	449	8	8	706.03	35500	2563.98	5
31113	NE	Logan County	0	6	8	14	7	0	0	13.858	745	570.681	9
31115	NE	Loup County	1	0	7	8	1	1	1	7.2404	644	569.709	9
31117	NE	McPherson County	0	2	7	9	2	0	0	5.6454	502	858.982	9
31119	NE	Madison County	3	212	415	630	294	3	3	243.598	34134	572.566	5
31121	NE	Merrick County	2	55	97	154	79	2	2	88.211	7690	484.877	7
31123	NE	Morrill County	0	33	78	111	47	0	0	67.1558	5047	1423.75	9
31125	NE	Nance County	0	28	23	51	40	0	0	40.2409	3572	441.317	9
31127	NE	Nemaha County	0	29	83	112	43	0	0	73.0861	7039	409.305	7
31129	NE	Nuckolls County	2	20	41	63	31	2	2	51.0699	4533	575.302	9
31131	NE	Otoe County	6	89	170	265	149	8	8	189.55	15647	615.687	6
31133	NE	Pawnee County	1	9	25	35	19	1	1	30.2741	2686	431.572	9
31135	NE	Perkins County	0	19	29	48	30	0	0	33.0002	2928	883.176	9
31137	NE	Phelps County	1	56	103	160	85	2	2	95.3272	9175	539.967	7
31139	NE	Pierce County	1	40	78	119	49	1	1	135.806	7284	573.927	9
31141	NE	Platte County	9	213	495	717	305	9	9	293.717	31849	678.069	5
31143	NE	Polk County	5	25	64	94	36	5	5	97.0744	5208	438.836	9
31145	NE	Red Willow County	2	52	172	226	66	3	3	76.8514	10748	716.654	7
31147	NE	Richardson County	1	33	105	139	51	2	2	86.2907	8351	553.259	7
31149	NE	Rock County	1	1	22	24	1	1	1	28.223	1515	1008.46	9
31151	NE	Saline County	3	67	205	275	100	3	3	115.573	13873	575.337	6
31153	NE	Sarpy County	11	848	1353	2212	1353	11	11	1212.91	146756	240.519	2
31155	NE	Saunders County	2	106	158	266	179	2	2	218.111	20184	753.895	2
31157	NE	Scotts Bluff County	5	306	494	805	462	7	7	335.47	36370	739.274	5
31159	NE	Seward County	4	93	258	355	145	4	4	302.03	16554	574.753	2
31161	NE	Sheridan County	3	28	71	102	54	4	4	101.636	5450	2441.04	9
31163	NE	Sherman County	2	14	30	46	23	2	2	56.189	3013	565.842	9
31165	NE	Sioux County	0	10	17	27	10	0	0	25.1884	1351	2066.59	9
31167	NE	Stanton County	1	25	38	64	45	1	1	92.0695	6395	429.827	9
31169	NE	Thayer County	1	30	72	103	49	1	1	96.2251	5163	574.554	9
31171	NE	Thomas County	1	5	13	19	7	1	1	7.9877	600	712.863	9
31173	NE	Thurston County	0	31	53	84	52	0	0	134.365	7208	393.812	8
31175	NE	Valley County	3	13	75	91	17	3	3	48.0175	4263	568.108	9
31177	NE	Washington County	2	117	231	350	185	2	2	262.448	19959	390.487	2
31179	NE	Wayne County	1	40	91	132	59	1	1	69.441	9317	443.435	6
31181	NE	Webster County	0	17	88	105	23	0	0	40.6448	3609	574.89	9
31183	NE	Wheeler County	0	10	4	14	11	0	0	10.7679	809	575.166	9
31185	NE	York County	2	94	257	353	161	2	2	317.563	14370	575.657	7
32001	NV	Churchill County							4	424.689	24891	4929.08	6
32003	NV	Clark County							248	11322.2	1836333	7910.34	1
32005	NV	Douglas County							8	515.688	45406	709.85	4
32007	NV	Elko County							18	1098.6	47010	17179	5
32009	NV	Esmeralda County							1	19.8384	695	3588.5	9
32011	NV	Eureka County							1	148.491	1559	4175.68	9
32013	NV	Humboldt County							7	468.227	17523	9647.91	7
32015	NV	Lander County							3	175.901	5104	5493.63	7
32017	NV	Lincoln County							6	91.8556	4759	10633.6	8
32019	NV	Lyon County							9	623.768	52479	1993.69	6
32021	NV	Mineral County							3	42.4755	4774	3756.4	7
32023	NV	Nye County							12	317.4	44116	18146.7	6
32027	NV	Pershing County							1	373.458	6376	6036.56	8
32029	NV	Storey County								25.5187	4193	263.453	2
32031	NV	Washoe County							45	3448.07	406079	6342.27	2
32033	NV	White Pine County							6	107.916	9146	8875.98	7
32510	NV	Carson City							1	306.664	54939	143.354	3
33001	NH	Belknap County							10	697.587	61048	401.293	4
33003	NH	Carroll County							5	417.713	47380	933.799	8
33005	NH	Cheshire County							15	635.225	77725	707.396	4
33007	NH	Coos County							3	267.677	32772	1800.39	7
33009	NH	Grafton County							5	1292.42	85514	1713.33	5
33011	NH	Hillsborough County							29	3599.93	402302	876.361	2
33013	NH	Merrimack County							15	1843.07	148274	934.43	4
33015	NH	Rockingham County							31	3962.62	296543	694.965	1
33017	NH	Strafford County							8	374.108	121581	368.761	1
33019	NH	Sullivan County							8	368.184	42689	537.376	7
34001	NJ	Atlantic County		3034		10576			55	3285.38	270644	561.074	2
34003	NJ	Bergen County		6967		33255			40	9571.27	895744	234.171	1
34005	NJ	Burlington County		3317		13520			54	4900.4	446817	804.573	1
34007	NJ	Camden County		4505		17771			45	4681.36	513769	222.298	1
34009	NJ	Cape May County		879		3335			21	902.71	96422	255.186	3
34011	NJ	Cumberland County		1294		5159			22	1325.81	155544	489.297	3
34013	NJ	Essex County		6424		24987			49	5886.17	776087	126.267	1
34015	NJ	Gloucester County		2087		7883			48	2633.46	285753	324.718	1
34017	NJ	Hudson County		3932		20782			26	2666.83	598160	46.6876	1
34019	NJ	Hunterdon County		780		4342			7	907.598	129348	429.942	1
34021	NJ	Mercer County		3071		14197			27	2748.62	365449	225.929	2
34023	NJ	Middlesex County		7071		31799			54	8379.86	788629	309.72	1
34025	NJ	Monmouth County		4895		21433			55	6526.19	642030	471.938	1
34027	NJ	Morris County		3291		17700			28	5590.4	488475	468.992	1
34029	NJ	Ocean County		4173		17676			74	3459.04	565493	636.276	1
34031	NJ	Passaic County		4732		19066			30	3463.12	492115	185.292	1
34033	NJ	Salem County		444		1849			13	1020.08	66016	337.88	1
34035	NJ	Somerset County		2563		12455			21	2812.63	323552	304.687	1
34037	NJ	Sussex County		1027		43933			15	864.696	151478	521.255	1
34039	NJ	Union County		5024		20809			31	4934.34	524658	103.289	1
34041	NJ	Warren County		783		3829			9	1409.96	109737	357.867	2
35001	NM	Bernalillo County							67	6240.22	629292	1166.03	2
35003	NM	Catron County							1	83.9222	3431	6927.81	9
35005	NM	Chaves County							9	654.159	62595	6070.86	5
35006	NM	Cibola County							13	613.492	27261	4539.21	6
35007	NM	Colfax County							5	510.356	13216	3756.79	7
35009	NM	Curry County							7	404.607	45328	1405.95	5
35011	NM	De Baca County							2	46.8666	1916	2324.87	9
35013	NM	Dona Ana County							25	2639.47	198791	3807.18	3
35015	NM	Eddy County							9	548.565	51002	4182.02	5
35017	NM	Grant County							9	524.371	29699	3965.88	7
35019	NM	Guadalupe County							15	427.694	4447	3030.37	7
35021	NM	Harding County								11.7501	716	2125.34	9
35023	NM	Hidalgo County							11	249.601	4945	3445.63	7
35025	NM	Lea County							15	599.662	58043	4392.96	5
35027	NM	Lincoln County							4	274.577	20783	4830.97	7
35028	NM	Los Alamos County							1	133.645	18558	109.345	6
35029	NM	Luna County							12	701.912	26996	2965.09	6
35031	NM	McKinley County							39	1623.53	70059	5448.72	4
35033	NM	Mora County							2	275.243	5069	1931.1	8
35035	NM	Otero County							7	726.928	63129	6626.5	4
35037	NM	Quay County							6	467.904	8971	2874.93	7
35039	NM	Rio Arriba County							16	677.548	40827	5857.63	6
35041	NM	Roosevelt County							2	243.057	19142	2448.5	7
35043	NM	Sandoval County							14	1364.93	117866	3709.34	2
35045	NM	San Juan County							40	1314.88	122427	5514.02	3
35047	NM	San Miguel County							6	716.079	28655	4717.04	6
35049	NM	Santa Fe County							19	2143.16	142955	1909.19	3
35051	NM	Sierra County							3	408.207	12316	4180.23	6
35053	NM	Socorro County							14	735.898	18118	6646.4	6
35055	NM	Taos County							13	487.179	31608	2203.17	7
35057	NM	Torrance County							10	652.999	16598	3344.81	2
35059	NM	Union County							4	92.6998	3792	3830	9
35061	NM	Valencia County							13	931.918	71364	1067.63	2
36001	NY	Albany County							25	3905.9	299307	523.445	2
36003	NY	Allegany County							8	430.403	49637	1030.22	7
36005	NY	Bronx County							31	4797.25	1373659	42.0271	1
36007	NY	Broome County							16	2496.47	195973	706.823	2
36009	NY	Cattaraugus County							15	821.274	80087	1309.85	4
36011	NY	Cayuga County							9	769.205	80066	693.185	4
36013	NY	Chautauqua County							19	1566.09	133945	1062.05	4
36015	NY	Chemung County							6	853.628	88015	408.17	3
36017	NY	Chenango County							9	448.334	51207	894.358	6
36019	NY	Clinton County							13	827.084	82215	1038.95	5
36021	NY	Columbia County							4	745.805	62363	635.734	6
36023	NY	Cortland County							7	679.764	48369	499.652	4
36025	NY	Delaware County							13	488.894	46286	1446.37	6
36027	NY	Dutchess County							23	4360.9	292746	801.595	2
36029	NY	Erie County							53	8728.32	913338	1044.21	1
36031	NY	Essex County							10	520.232	38119	1796.8	6
36033	NY	Franklin County							4	406.648	50449	1631.49	5
36035	NY	Fulton County							9	419.123	55114	496.166	4
36037	NY	Genesee County							17	1119.72	58122	494.109	4
36039	NY	Greene County							7	709.15	49246	647.746	6
36041	NY	Hamilton County								97.5334	5075	1720.39	8
36043	NY	Herkimer County							1	895.438	62558	1411.25	2
36045	NY	Jefferson County							10	1271.82	117201	1272.2	4
36047	NY	Kings County							96	4924.89	2528050	70.606	1
36049	NY	Lewis County							8	230.493	26472	1275.42	6
36051	NY	Livingston County							5	806.652	63196	632.128	1
36053	NY	Madison County							6	689.074	69829	655.856	2
36055	NY	Monroe County							45	7908.83	729681	659.294	1
36057	NY	Montgomery County							7	804.67	48695	404.815	4
36059	NY	Nassau County							93	11876.1	1306533	286.692	1
36061	NY	New York County							58	4385.99	1620867	22.9637	1
36063	NY	Niagara County							18	1656.27	214845	522.948	1
36065	NY	Oneida County							21	2326.53	232304	1212.7	2
36067	NY	Onondaga County							38	5081.37	454010	780.293	2
36069	NY	Ontario County							23	1417.65	103956	644.382	1
36071	NY	Orange County							45	5742.55	377169	816.338	2
36073	NY	Orleans County							6	323.614	42371	391.396	1
36075	NY	Oswego County							17	1066.87	121454	953.302	2
36077	NY	Otsego County							15	633.917	62397	1002.8	6
36079	NY	Putnam County							15	2729.52	99489	231.283	1
36081	NY	Queens County							71	7925.29	2270338	109.235	1
36083	NY	Rensselaer County							12	1531.42	155318	653.964	2
36085	NY	Richmond County							17	2019.64	481613	58.4787	1
36087	NY	Rockland County							19	2737.54	296483	174.219	1
36089	NY	St. Lawrence County							20	850.299	109809	2685.6	5
36091	NY	Saratoga County							15	2328.46	215852	811.844	2
36093	NY	Schenectady County							8	1596.82	150818	206.103	2
36095	NY	Schoharie County							2	556.98	32063	622.022	2
36097	NY	Schuyler County								163.662	19027	328.707	6
36099	NY	Seneca County							12	475.992	34228	324.913	6
36101	NY	Steuben County							21	1299.93	96874	1392.64	4
36103	NY	Suffolk County							167	19684.4	1453229	912.198	1
36105	NY	Sullivan County							10	747.702	76303	969.715	4
36107	NY	Tioga County							9	657.414	50453	518.692	2
36109	NY	Tompkins County							7	826.986	101055	476.051	3
36111	NY	Ulster County							34	2089.7	181860	1126.48	3
36113	NY	Warren County							11	996.749	66143	869.292	3
36115	NY	Washington County							10	559.414	62743	835.438	3
36117	NY	Wayne County							11	639.198	91291	604.214	1
36119	NY	Westchester County							37	9186.51	951325	432.824	1
36121	NY	Wyoming County							8	260.258	41932	592.914	6
36123	NY	Yates County							6	179.609	24557	338.236	6
37001	NC	Alamance County	13	1233	2450	3696	1980	16	17	1358.21	145360	429.989	3
37003	NC	Alexander County	5	232	347	584	333	6	6	199.125	36396	260.185	2
37005	NC	Alleghany County	2	95	96	193	133	2	1	70.3899	10915	234.65	9
37007	NC	Anson County	11	242	521	774	406	11	11	255.477	25202	531.567	1
37009	NC	Ashe County	7	175	459	641	254	7	6	201.137	25531	426.129	9
37011	NC	Avery County	2	126	229	357	181	2	2	159.982	17776	247.004	8
37013	NC	Beaufort County	7	397	722	1126	604	7	7	268.652	45771	827.967	6
37015	NC	Bertie County	9	209	296	514	323	9	9	207.007	18601	699.193	9
37017	NC	Bladen County	17	355	508	880	634	18	18	320.474	32301	874.936	6
37019	NC	Brunswick County	30	743	1651	2424	1213	33	33	1100.65	99214	854.794	2
37021	NC	Buncombe County	31	2149	3232	5412	3113	31	31	3681.12	226771	655.99	2
37023	NC	Burke County	19	799	1306	2124	1243	22	22	586.57	88975	506.725	2
37025	NC	Cabarrus County	17	1399	2906	4322	2234	18	18	1851.83	163262	364.39	1
37027	NC	Caldwell County	11	698	1030	1739	1097	13	13	382.394	79454	471.599	2
37029	NC	Camden County	1	47	77	125	78	1	1	109.882	9490	240.677	8
37031	NC	Carteret County	14	462	993	1469	689	17	15	451.994	63238	519.841	4
37033	NC	Caswell County	11	120	316	447	180	12	12	175.167	23261	424.666	8
37035	NC	Catawba County	21	1663	3426	5110	2563	25	25	2656.83	155646	399.968	2
37037	NC	Chatham County	17	336	1175	1528	502	21	21	579.034	61455	682.853	2
37039	NC	Cherokee County	4	184	241	429	265	4	4	227.664	26499	455.188	9
37041	NC	Chowan County	1	73	176	250	109	1	1	67.9747	14635	172.637	7
37043	NC	Clay County	0	75	87	162	103	0	0	77.6031	10238	214.702	9
37045	NC	Cleveland County	25	805	1494	2324	1284	28	27	574.542	98453	464.629	4
37047	NC	Columbus County	12	617	1067	1696	1054	13	12	453.205	54046	936.804	6
37049	NC	Craven County	11	670	1445	2126	1052	13	13	564.781	96746	708.427	5
37051	NC	Cumberland County	52	2749	5939	8740	4589	53	55	2869.34	306518	652.716	2
37053	NC	Currituck County	12	145	207	364	228	14	14	299.23	23960	261.696	1
37055	NC	Dare County	5	206	519	730	316	5	5	454.557	33776	383.577	5
37057	NC	Davidson County	31	1238	2010	3279	1972	35	34	1863.54	156530	552.149	4
37059	NC	Davie County	7	293	577	877	446	7	7	400.575	40516	265.185	2
37061	NC	Duplin County	12	447	1170	1629	749	15	15	578.395	52979	817.728	6
37063	NC	Durham County	21	2246	6823	9090	3360	22	22	3712.01	256500	290.317	2
37065	NC	Edgecombe County	13	471	958	1442	747	14	13	411.659	52647	505.026	3
37067	NC	Forsyth County	29	2603	5788	8420	3995	34	33	5017.79	338774	409.595	2
37069	NC	Franklin County	19	395	949	1363	593	19	20	418.23	57222	492.023	2
37071	NC	Gaston County	31	1967	2852	4850	3268	35	34	2292.23	202535	356.215	1
37073	NC	Gates County	5	108	137	250	162	5	5	106.21	11737	340.607	8
37075	NC	Graham County	2	112	59	173	152	2	2	48.6516	7858	292.067	9
37077	NC	Granville County	20	295	803	1118	450	23	23	211.093	55045	531.117	6
37079	NC	Greene County	0	138	341	479	216	0	0	176.649	20405	265.399	3
37081	NC	Guilford County	58	4224	7367	11649	6337	66	61	6172.76	465931	649.423	2
37083	NC	Halifax County	20	447	806	1273	760	21	21	447.89	55060	725.357	4
37085	NC	Harnett County	25	784	1339	2148	1292	25	25	653.932	108721	595.013	4
37087	NC	Haywood County	13	434	684	1131	653	14	14	537.267	56430	553.664	2
37089	NC	Henderson County	12	752	1668	2432	1083	12	12	415.368	100810	374.002	2
37091	NC	Hertford County	7	214	264	485	396	9	9	168.911	23206	353.258	7
37093	NC	Hoke County	12	288	489	789	495	15	15	268.052	42422	391.215	2
37095	NC	Hyde County	0	36	103	139	54	0	0	40.5868	5172	612.795	9
37097	NC	Iredell County	22	1365	2505	3892	2090	33	33	1025.46	151445	575.568	4
37099	NC	Jackson County	8	334	574	916	495	9	8	415.807	36751	490.714	6
37101	NC	Johnston County	47	1273	2830	4150	2026	55	54	1491.99	157437	791.855	2
37103	NC	Jones County	1	100	240	341	145	1	1	153.287	10127	471.878	8
37105	NC	Lee County	22	500	1099	1621	800	22	19	283.355	57973	257.261	4
37107	NC	Lenoir County	14	526	808	1348	973	15	15	253.602	56761	399.852	4
37109	NC	Lincoln County	22	578	955	1555	952	23	23	398.217	73106	298.791	4
37111	NC	McDowell County	7	367	483	857	537	9	9	455.331	43537	441.68	6
37113	NC	Macon County	5	298	383	686	434	5	5	287.117	32608	516.471	7
37115	NC	Madison County	4	103	229	336	147	4	4	153.409	20309	449.42	2
37117	NC	Martin County	3	159	335	497	255	3	3	220.189	23598	461.175	6
37119	NC	Mecklenburg County	83	8950	22195	31228	14191	92	88	7902.01	867067	526.275	1
37121	NC	Mitchell County	4	111	184	299	168	8	8	109.615	15786	221.427	9
37123	NC	Montgomery County	9	180	367	556	284	9	9	303.129	27451	491.599	6
37125	NC	Moore County	17	642	1327	1986	976	18	18	479.883	84435	697.735	4
37127	NC	Nash County	20	942	2120	3082	1474	24	24	1206.98	92949	540.269	3
37129	NC	New Hanover County	20	1960	3637	5617	3207	21	21	1707.83	190432	198.934	2
37131	NC	Northampton County	7	160	283	450	272	7	7	262.834	20830	536.479	9
37133	NC	Onslow County	31	1138	2324	3493	1711	34	33	1204.56	162745	766.818	3
37135	NC	Orange County	11	709	1961	2681	1019	11	11	1069.84	124313	399.838	2
37137	NC	Pamlico County	3	83	149	235	111	5	5	91.5156	12577	336.942	9
37139	NC	Pasquotank County	3	249	595	847	369	3	3	119.976	40543	226.876	7
37141	NC	Pender County	15	362	993	1370	561	17	17	590.949	49865	870.673	2
37143	NC	Perquimans County	0	75	156	231	97	0	0	121.749	12498	247.168	9
37145	NC	Person County	9	279	852	1140	406	9	9	170.422	37356	392.311	2
37147	NC	Pitt County	29	1283	3192	4504	2213	32	31	1235.3	152068	651.577	3
37149	NC	Polk County	3	154	239	396	236	3	3	243.058	19036	237.854	8
37151	NC	Randolph County	30	992	2372	3394	1540	35	35	1000.7	140145	787.361	2
37153	NC	Richmond County	11	408	656	1075	720	11	11	296.989	45985	473.979	4
37155	NC	Robeson County	67	1590	2477	4134	2853	74	72	1034.7	128149	948.839	4
37157	NC	Rockingham County	19	705	1456	2180	1106	21	21	543.522	92421	566.435	2
37159	NC	Rowan County	29	1125	2353	3507	1695	33	31	588.186	137383	511.314	4
37161	NC	Rutherford County	12	515	733	1260	798	12	12	423.949	63012	564.117	4
37163	NC	Sampson County	19	544	1021	1584	886	19	18	533.288	63641	945.447	6
37165	NC	Scotland County	13	307	378	698	525	15	15	217.076	36364	319.144	6
37167	NC	Stanly County	7	409	885	1301	620	9	9	294.367	59195	395.058	6
37169	NC	Stokes County	9	262	672	943	362	11	11	303.231	46072	451.838	2
37171	NC	Surry County	18	563	1112	1693	854	18	18	650.588	72380	536.519	4
37173	NC	Swain County	2	87	128	217	113	2	2	167.747	13643	528.101	8
37175	NC	Transylvania County	2	207	343	552	269	2	2	157.554	29984	378.39	6
37177	NC	Tyrrell County	2	19	98	119	24	2	2	44.1599	4121	389.912	9
37179	NC	Union County	33	1355	2805	4193	2123	35	34	1037.42	184675	637.367	1
37181	NC	Vance County	5	283	765	1053	452	5	5	277.071	42992	253.516	4
37183	NC	Wake County	61	6351	20242	26654	9862	63	61	9388.32	832970	831.924	2
37185	NC	Warren County	12	126	386	524	179	12	12	194.69	19410	428.702	8
37187	NC	Washington County	2	84	182	268	131	2	2	119.259	12915	348.464	7
37189	NC	Watauga County	6	365	1180	1551	532	8	8	261.544	44541	312.509	6
37191	NC	Wayne County	17	975	1764	2756	1608	20	22	903.801	113590	552.569	3
37193	NC	Wilkes County	19	575	980	1574	898	23	23	547.778	66844	757.186	6
37195	NC	Wilson County	14	719	1663	2396	1153	16	15	560.297	76754	371.089	4
37197	NC	Yadkin County	8	226	575	809	330	9	9	444.108	37797	335.554	2
37199	NC	Yancey County	1	109	185	295	170	1	1	127.192	18456	312.454	8
38001	ND	Adams County								37.5053	2279	987.914	9
38003	ND	Barnes County							1	197.703	10783	1491.65	6
38005	ND	Benson County							3	114.704	6971	1380.6	9
38007	ND	Billings County								66.4882	798	1151.41	9
38009	ND	Bottineau County								105.45	6409	1668.59	9
38011	ND	Bowman County							5	48.4322	2944	1162.05	9
38013	ND	Burke County							1	30.651	1862	1103.53	9
38015	ND	Burleigh County							5	647.628	77316	1633.09	3
38017	ND	Cass County							7	1293.32	137582	1765.23	3
38019	ND	Cavalier County								64.3481	3911	1488.46	9
[truncated: 1,145 more rows]

## Sheet: 1999
			CRASHES				PERSONS
FIPS_CODE	State_abv	County_name	Fatal	Non-Fatal Inj	PDO	Total	Injuries	Fatalities	Fatalities_fars	VMT	Population	Land_area	RUCC
1001	AL	Autauga County				1159	394	10	10	487.297	43140	595.968	2
1003	AL	Baldwin County				3499	1218	31	31	1843.69	135820	1596.35	4
1005	AL	Barbour County				711	219	9	9	415.121	26726	884.904	6
1007	AL	Bibb County				182	102	7	7	227.861	19601	623.025	1
1009	AL	Blount County				1070	482	20	20	573.661	47411	645.585	1
1011	AL	Bullock County				170	120	6	6	154.621	11343	625.013	6
1013	AL	Butler County				696	299	14	14	579.752	21522	776.867	6
1015	AL	Calhoun County				3890	1342	29	29	1542.31	116541	608.461	3
1017	AL	Chambers County				1005	388	14	14	365.651	36369	597.168	6
1019	AL	Cherokee County				494	216	11	11	291.864	21894	553.121	8
1021	AL	Chilton County				995	432	11	11	656.849	37604	693.979	1
1023	AL	Choctaw County				178	124	15	15	191.869	15518	913.514	9
1025	AL	Clarke County				561	278	13	13	312.485	28756	1238.38	7
1027	AL	Clay County				175	88	3	4	164.399	14012	605.074	9
1029	AL	Cleburne County				443	179	11	11	391.31	14456	560.211	8
1031	AL	Coffee County				1039	373	12	6	473.493	42128	678.99	6
1033	AL	Colbert County				1730	606	18	18	657.529	52552	594.532	3
1035	AL	Conecuh County				368	175	6	5	415.669	13728	850.794	9
1037	AL	Coosa County				264	126	5	6	196.872	11712	652.443	8
1039	AL	Covington County				682	318	16	16	458.109	37587	1033.82	7
1041	AL	Crenshaw County				227	119	7	7	193.398	13619	609.58	8
1043	AL	Cullman County				2363	852	33	33	936.299	75661	738.428	6
1045	AL	Dale County				973	357	15	15	624.84	49127	561.074	4
1047	AL	Dallas County				1464	546	8	8	398.961	46669	980.713	4
1049	AL	DeKalb County				1708	656	17	17	807.557	58948	777.913	6
1051	AL	Elmore County				1567	608	21	21	600.245	63488	621.256	2
1053	AL	Escambia County				868	409	16	16	562.425	36671	947.383	6
1055	AL	Etowah County				3246	1147	21	21	1218.51	103472	534.822	3
1057	AL	Fayette County				376	179	4	3	225.524	18103	627.66	6
1059	AL	Franklin County				621	274	13	13	428.228	29716	635.645	6
1061	AL	Geneva County				467	204	7	7	273.111	24968	576.28	3
1063	AL	Greene County				332	162	8	8	336.521	9756	645.865	3
1065	AL	Hale County				290	150	6	6	195.014	16870	643.736	3
1067	AL	Henry County				328	144	8	8	265.259	15787	561.796	3
1069	AL	Houston County				3327	1466	21	21	1070.96	86116	580.36	3
1071	AL	Jackson County				1053	433	10	9	759.611	51535	1078.74	6
1073	AL	Jefferson County				25054	6505	90	90	8012.32	657422	1112.61	1
1075	AL	Lamar County				147	99	4	4	211.573	16034	604.847	9
1077	AL	Lauderdale County				2461	790	12	12	879.066	84327	669.461	3
1079	AL	Lawrence County				667	313	19	19	387.707	33795	693.382	3
1081	AL	Lee County				3897	1242	21	21	1081.56	102164	608.71	3
1083	AL	Limestone County				1865	716	21	20	903.988	63037	568.049	2
1085	AL	Lowndes County				344	180	13	13	333.163	13029	717.936	2
1087	AL	Macon County				654	292	7	7	494.752	22993	610.523	6
1089	AL	Madison County				8824	2791	51	49	2315.71	280381	804.922	2
1091	AL	Marengo County				352	201	5	5	283.071	23158	977.045	7
1093	AL	Marion County				630	247	12	13	568.187	30464	741.415	8
1095	AL	Marshall County				2553	923	24	24	719.16	80524	567.06	4
1097	AL	Mobile County				14201	4415	84	81	3718.71	399652	1233.09	2
1099	AL	Monroe County				453	199	7	7	237.608	23960	1025.85	7
1101	AL	Montgomery County				10927	3471	22	22	2504.28	215813	789.763	2
1103	AL	Morgan County				3524	1202	33	35	1280.33	109665	582.213	3
1105	AL	Perry County				180	88	6	6	139.577	12610	719.484	8
1107	AL	Pickens County				293	143	5	5	278.384	21028	881.418	8
1109	AL	Pike County				827	256	11	10	423.041	28469	671.033	6
1111	AL	Randolph County				461	169	6	7	207.561	20263	581.045	6
1113	AL	Russell County				2036	1023	19	19	658.358	50071	641.317	2
1115	AL	St. Clair County				1490	579	31	32	1056.33	63852	633.752	1
1117	AL	Shelby County				3928	1131	28	27	1407.17	146392	794.694	1
1119	AL	Sumter County				341	132	17	17	394.202	15615	904.935	8
1121	AL	Talladega County				2163	814	19	19	771.985	77521	739.532	4
1123	AL	Tallapoosa County				937	392	8	8	485.256	40329	717.933	6
1125	AL	Tuscaloosa County				7006	2251	41	41	2345.94	161435	1324.37	3
1127	AL	Walker County				2136	849	32	32	821.801	71318	794.391	1
1129	AL	Washington County				216	117	4	4	240.367	17742	1080.66	8
1131	AL	Wilcox County				229	130	8	8	164.293	13414	888.683	8
1133	AL	Winston County				407	220	12	12	291.715	24459	614.437	6
2013	AK	Aleutians East Borough								24.4179	2179	6988.14	9
2016	AK	Aleutians West Census Area								43.8292	3913	4396.77	7
2020	AK	Anchorage Municipality							22	1655.74	257808	1697.21	2
2050	AK	Bethel Census Area								133.948	16215	40633.3	7
2060	AK	Bristol Bay Borough							1	11.0712	1061	504.916	9
2068	AK	Denali Borough								16.434	1883	12749.7	8
2070	AK	Dillingham Census Area								47.6228	4565	18674.8	9
2090	AK	Fairbanks North Star Borough							12	433.426	84366	7366.24	3
2100	AK	Haines Borough								25.6288	2288	2343.73	9
2110	AK	Juneau City and Borough							2	132.94	30192	2716.67	5
2122	AK	Kenai Peninsula Borough							9	362.788	48993	16013.3	7
2130	AK	Ketchikan Gateway Borough							1	94.8559	14097	1233.22	7
2150	AK	Kodiak Island Borough								109.318	14350	6559.85	7
2164	AK	Lake and Peninsula Borough							1	18.2319	1748	23782	9
2170	AK	Matanuska-Susitna Borough							16	534.049	57945	24681.5	2
2180	AK	Nome Census Area							1	61.0835	8908	23000.9	7
2185	AK	North Slope Borough							1	36.2242	7089	88817.1	7
2188	AK	Northwest Arctic Borough							1	58.6363	6720	35898.3	7
2201	AK	Prince of Wales-Outer Ketchikan Census Area							2	74.9869	6694	7410.62	9
2220	AK	Sitka City and Borough								36.3991	8193	2873.98	7
2232	AK	Skagway-Hoonah-Angoon Census Area								39.0832	3489	7896.48	9
2240	AK	Southeast Fairbanks Census Area							3	51.0753	5852	24814.9	8
2261	AK	Valdez-Cordova Census Area							3	82.553	10229	34319.1	9
2270	AK	Wade Hampton Census Area								60.7618	6963	17193.5	9
2280	AK	Wrangell-Petersburg Census Area							1	54.4616	6802	5834.94	7
2282	AK	Yakutat City and Borough								8.6141	770	7650.46	9
2290	AK	Yukon-Koyukuk Census Area							3	53.9967	6188	145900	8
4001	AZ	Apache County	41	272	436	749	521	53	46	1256.53	68562	11204.9	6
4003	AZ	Cochise County	43	654	1459	2156	1127	50	51	1669.62	112754	6169.45	4
4005	AZ	Coconino County	50	1120	3033	4203	1802	54	59	2342.99	114498	18617.4	3
4007	AZ	Gila County	18	409	736	1163	683	24	23	559.029	49051	4767.7	4
4009	AZ	Graham County	8	135	213	356	253	9	9	314.329	31998	4629.32	6
4011	AZ	Greenlee County	1	39	50	90	64	1	1	81.6166	9018	1847	7
4012	AZ	La Paz County	11	147	244	402	264	12	12	534.919	14867	4499.95	6
4013	AZ	Maricopa County	394	30331	52345	83070	48436	435	435	24029.8	2861395	9203.14	1
4015	AZ	Mohave County	41	977	1838	2856	1654	44	45	1896.36	134222	13311.6	4
4017	AZ	Navajo County	33	391	780	1204	697	39	38	1675.88	98327	9953.18	4
4019	AZ	Pima County	116	7764	11987	19867	12470	123	123	6638.17	803618	9186.27	2
4021	AZ	Pinal County	76	1025	2029	3130	1816	89	88	2270.04	152301	5369.59	1
4023	AZ	Santa Cruz County	6	159	437	602	247	6	6	531.256	39150	1237.63	4
4025	AZ	Yavapai County	44	1137	2333	3514	1840	58	58	2411.08	152957	8123.3	3
4027	AZ	Yuma County	25	981	1396	2402	1640	27	28	1577.53	135614	5514.09	3
5001	AR	Arkansas County							1	164.885	20717	988.49	6
5003	AR	Ashley County							9	218.064	24287	921.148	7
5005	AR	Baxter County							12	400.759	36664	554.361	7
5007	AR	Benton County							20	1320.82	138424	845.994	2
5009	AR	Boone County							4	331.831	31846	591.177	7
5011	AR	Bradley County							5	100.175	11409	650.628	6
5013	AR	Calhoun County							1	75.5499	5657	628.274	9
5015	AR	Carroll County							8	250.638	22516	630.274	6
5017	AR	Chicot County							4	69.3243	14858	644.027	7
5019	AR	Clark County							14	479.151	21403	865.433	7
5021	AR	Clay County							4	141.838	17025	639.298	7
5023	AR	Cleburne County							6	157.438	23296	553.049	6
5025	AR	Cleveland County							1	114.236	8558	597.739	3
5027	AR	Columbia County							10	240.046	24686	766.114	7
5029	AR	Conway County							6	346.862	19856	556.15	6
5031	AR	Craighead County							20	681.964	77668	710.84	3
5033	AR	Crawford County							13	741.149	51409	595.393	2
5035	AR	Crittenden County							20	785.661	50138	610.166	1
5037	AR	Cross County							1	189.026	19302	615.846	6
5039	AR	Dallas County							5	62.9444	8920	667.42	6
5041	AR	Desha County							1	105.387	14855	764.989	6
5043	AR	Drew County							12	164.781	17449	828.182	7
5045	AR	Faulkner County							10	943.48	80034	647.378	2
5047	AR	Franklin County							3	300.986	16801	609.555	2
5049	AR	Fulton County							6	138.987	11019	618.155	9
5051	AR	Garland County							21	789.776	84475	677.223	3
5053	AR	Grant County							3	167.951	15984	631.777	2
5055	AR	Greene County							5	308.684	36395	577.509	6
5057	AR	Hempstead County							7	385.379	22093	728.774	6
5059	AR	Hot Spring County							4	548.767	29154	614.933	6
5061	AR	Howard County							4	79.5368	13681	587.421	7
5063	AR	Independence County							12	360.012	33066	763.781	7
5065	AR	Izard County							5	112.07	13112	580.684	9
5067	AR	Jackson County							7	177.993	17516	633.524	6
5069	AR	Jefferson County							21	776.354	80785	884.815	3
5071	AR	Johnson County							11	391.967	21358	662.168	6
5073	AR	Lafayette County							4	118.061	8846	526.497	8
5075	AR	Lawrence County							5	141.868	17342	586.567	6
5077	AR	Lee County							3	102.438	12699	601.663	6
5079	AR	Lincoln County							3	152.397	14372	561.202	3
5081	AR	Little River County							3	134.134	13065	531.734	6
5083	AR	Logan County								183.729	21134	709.873	6
5085	AR	Lonoke County							9	755.816	51447	765.96	2
5087	AR	Madison County							6	177.653	13313	836.813	2
5089	AR	Marion County							2	198.935	14902	597.702	9
5091	AR	Miller County							11	489.393	39377	623.979	3
5093	AR	Mississippi County							17	896.711	49920	898.249	4
5095	AR	Monroe County							10	211.794	9990	606.647	7
5097	AR	Montgomery County							5	116.645	8740	780.927	8
5099	AR	Nevada County							4	181.454	10024	619.953	7
5101	AR	Newton County							3	109.753	8226	822.969	9
5103	AR	Ouachita County							6	278.08	27487	732.45	7
5105	AR	Perry County							3	129.163	9678	550.944	2
5107	AR	Phillips County							6	196.47	27049	692.672	7
5109	AR	Pike County							1	89.2773	10451	603.008	9
5111	AR	Poinsett County							8	249.965	24592	757.739	3
5113	AR	Polk County							4	209.991	19607	859.379	7
5115	AR	Pope County							6	636.452	52598	811.9	5
5117	AR	Prairie County							3	315.382	9284	645.934	8
5119	AR	Pulaski County							56	3986.61	349232	770.821	2
5121	AR	Randolph County							4	183.426	17904	651.824	7
5123	AR	St. Francis County							12	712.893	27766	633.837	6
5125	AR	Saline County							9	949.201	78361	723.462	2
5127	AR	Scott County							4	101.699	10644	893.88	6
5129	AR	Searcy County							3	103.975	7791	667.149	9
5131	AR	Sebastian County							14	1011.42	106252	536.243	2
5133	AR	Sevier County							12	132.084	14671	563.941	7
5135	AR	Sharp County							1	169.147	17092	604.353	7
5137	AR	Stone County							4	95.8516	11220	606.592	9
5139	AR	Union County							13	447.122	44967	1038.9	5
5141	AR	Van Buren County							7	209.246	15677	711.514	8
5143	AR	Washington County							23	1502.1	146593	949.717	2
5145	AR	White County							14	686.415	65081	1034.03	4
5147	AR	Woodruff County							3	54.581	8710	586.564	9
5149	AR	Yell County							7	201.062	18853	927.891	6
6001	CA	Alameda County	82	8860			12655	90	89	10255.8	1415582	737.572	1
6003	CA	Alpine County	2	40			61	2	2	13.8702	1161	738.617	8
6005	CA	Amador County	13	216			362	13	12	352.955	34153	592.966	6
6007	CA	Butte County	27	908			1387	32	32	1560.74	195220	1639.49	3
6009	CA	Calaveras County	16	256			388	17	17	421.575	40051	1020.04	6
6011	CA	Colusa County	5	130			237	7	7	190.164	18844	1150.68	6
6013	CA	Contra Costa County	45	4115			5969	47	46	6579.5	933141	719.946	1
6015	CA	Del Norte County	6	180			270	6	7	200.386	26477	1007.81	7
6017	CA	El Dorado County	22	957			1446	22	23	1331.52	161358	1710.85	1
6019	CA	Fresno County	162	3927			6990	204	200	7177.36	763069	5962.73	2
6021	CA	Glenn County	5	144			234	7	7	242.36	26328	1314.79	6
6023	CA	Humboldt County	17	800			1155	21	21	1145.73	121358	3572.49	5
6025	CA	Imperial County	31	713			1264	35	37	1443.21	145287	4174.73	3
6027	CA	Inyo County	14	108			203	17	17	199.289	17958	10203.1	7
6029	CA	Kern County	112	3266			5475	131	134	6264.86	642495	8140.96	2
6031	CA	Kings County	28	576			948	37	38	1041.34	123241	1390.99	3
6033	CA	Lake County	14	318			480	15	16	549.326	55405	1257.96	4
6035	CA	Lassen County	8	150			245	10	10	255.866	33028	4557.27	6
6037	CA	Los Angeles County	618	54440			83978	684	675	78808.5	9329989	4060.87	1
6039	CA	Madera County	34	720			1203	38	37	1095.37	116760	2135.86	3
6041	CA	Marin County	13	1349			1832	13	13	2137.08	236768	519.803	1
6043	CA	Mariposa County	6	102			188	6	7	173.01	15605	1451.12	8
6045	CA	Mendocino County	27	566			883	30	32	837.675	84085	3508.97	4
6047	CA	Merced County	38	1348			2208	46	48	2199.49	200746	1928.69	3
6049	CA	Modoc County	1	44			68	1	1	88.3293	9210	3944.1	6
6051	CA	Mono County	4	110			170	4	5	116.07	10512	3044.4	7
6053	CA	Monterey County	39	1796			2667	42	42	2949.2	371756	3321.95	2
6055	CA	Napa County	19	930			1381	21	21	852.275	120962	753.734	3
6057	CA	Nevada County	23	588			903	24	28	864.321	92014	957.613	4
6059	CA	Orange County	159	15248			22780	175	175	25447.1	2760948	789.404	1
6061	CA	Placer County	34	1501			2286	41	44	2319.58	239485	1404.37	1
6063	CA	Plumas County	7	150			221	8	8	235.79	20370	2553.69	7
6065	CA	Riverside County	208	7290			11752	231	231	13262.6	1530653	7207.37	1
6067	CA	Sacramento County	103	8428			12735	117	116	10656.9	1184586	965.652	1
6069	CA	San Benito County	7	296			476	9	8	410.625	51276	1389.06	1
6071	CA	San Bernardino County	249	9248			15255	297	300	13733.5	1669934	20052.5	1
6073	CA	San Diego County	263	15115			22774	284	285	25322.6	2820844	4199.89	1
6075	CA	San Francisco County	48	4826			7155	48	45	2657.93	746777	46.6945	1
6077	CA	San Joaquin County	79	3997			6318	95	94	5480.84	563183	1399.28	2
6079	CA	San Luis Obispo County	35	1108			1633	48	46	2135.25	236953	3304.32	3
6081	CA	San Mateo County	31	3602			5024	35	36	4653.39	702102	449.067	1
6083	CA	Santa Barbara County	29	1903			2668	34	34	3237.18	391071	2737.01	2
6085	CA	Santa Clara County	93	9360			13279	103	97	10874.4	1647419	1290.69	1
6087	CA	Santa Cruz County	9	1350			1836	10	10	1954.94	245201	445.241	2
6089	CA	Shasta County	30	1129			1758	35	37	1451.97	164530	3785.19	3
6091	CA	Sierra County	2	31			44	3	3	34.6749	3334	953.382	8
6093	CA	Siskiyou County	10	233			364	10	10	461.724	43570	6286.78	7
6095	CA	Solano County	25	1881			2838	25	25	3658.39	385723	829.19	2
6097	CA	Sonoma County	49	2990			4401	52	52	3223.31	439970	1575.88	2
6099	CA	Stanislaus County	56	3058			4904	67	67	3949.3	436790	1493.79	2
6101	CA	Sutter County	15	520			854	19	19	674.155	78423	602.543	3
6103	CA	Tehama County	15	341			540	17	17	457.344	54012	2950.99	4
6105	CA	Trinity County	5	119			158	5	4	127.02	12927	3178.61	8
6107	CA	Tulare County	60	1896			3217	67	68	3520.42	358470	4823.97	2
6109	CA	Tuolumne County	9	353			582	9	10	504.795	53764	2235.41	4
6111	CA	Ventura County	52	3938			5912	59	60	7043.04	745063	1845.3	2
6113	CA	Yolo County	17	773			1130	19	19	1577.16	155573	1013.27	1
6115	CA	Yuba County	14	389			583	15	15	452.965	59607	630.694	3
8001	CO	Adams County							35	3406.65	331045	1191.93	1
8003	CO	Alamosa County							4	193.45	14595	722.743	7
8005	CO	Arapahoe County							37	3524.55	482089	803.145	1
8007	CO	Archuleta County							3	167.496	9604	1350.22	7
8009	CO	Baca County							4	89.1053	4319	2555.72	9
8011	CO	Bent County							1	108.789	5799	1513.9	7
8013	CO	Boulder County							18	2058.48	273112	742.46	2
8014	CO	Broomfield County											1
8015	CO	Chaffee County							3	232.914	15601	1013.45	7
8017	CO	Cheyenne County							1	87.2555	2229	1781.35	9
8019	CO	Clear Creek County							8	448.88	9167	395.448	1
8021	CO	Conejos County							6	105.396	8077	1287.22	9
8023	CO	Costilla County							1	113.088	3575	1227.1	9
8025	CO	Crowley County								40.6942	4428	788.995	8
8027	CO	Custer County							2	47.1471	3596	738.887	8
8029	CO	Delta County							8	307.084	27197	1142.11	6
8031	CO	Denver County							52	5139.44	499775	153.351	1
8033	CO	Dolores County							2	49.068	1876	1066.97	9
8035	CO	Douglas County							22	2051.4	156860	840.112	1
8037	CO	Eagle County							14	663.397	34950	1687.88	5
8039	CO	Elbert County							6	290.73	19757	1850.78	1
8041	CO	El Paso County							52	3488.69	499994	2126.45	2
8043	CO	Fremont County							11	403.802	44699	1532.93	4
8045	CO	Garfield County							19	626.289	40671	2947.06	5
8047	CO	Gilpin County								105.571	4474	149.868	1
8049	CO	Grand County							9	290.212	10474	1846.67	8
8051	CO	Gunnison County							3	254.244	12576	3238.81	7
8053	CO	Hinsdale County								15.5569	740	1117.68	9
8055	CO	Huerfano County							7	215.729	6802	1590.87	6
8057	CO	Jackson County							5	54.0372	1540	1613.21	9
8059	CO	Jefferson County							48	4448.88	509222	772.094	1
8061	CO	Kiowa County							1	70.3582	1634	1770.99	9
8063	CO	Kit Carson County							1	239.071	7411	2160.87	7
8065	CO	Lake County							2	112.985	6385	376.893	7
8067	CO	La Plata County							15	562.535	41148	1692.15	6
8069	CO	Larimer County							29	2012.2	236849	2601.3	2
8071	CO	Las Animas County							6	193.52	14712	4772.63	7
8073	CO	Lincoln County							1	190.012	5672	2586.09	8
8075	CO	Logan County							13	268.313	17932	1838.52	7
8077	CO	Mesa County							22	927.766	115147	3327.75	3
8079	CO	Mineral County								61.4645	727	875.719	9
8081	CO	Moffat County							5	156.115	12714	4742.25	7
8083	CO	Montezuma County							3	413.37	22672	2036.63	6
8085	CO	Montrose County							4	312.031	31432	2240.61	7
8087	CO	Morgan County							11	270.24	25393	1285.36	6
8089	CO	Otero County							4	225.144	20612	1262.86	6
8091	CO	Ouray County							2	119.629	3475	540.468	9
8093	CO	Park County							3	259.202	14218	2200.69	1
8095	CO	Phillips County							2	55.3314	4226	687.622	9
8097	CO	Pitkin County							4	229.308	13332	970.421	7
8099	CO	Prowers County							4	184.185	13781	1640.38	7
8101	CO	Pueblo County							31	1288.44	136987	2388.69	3
8103	CO	Rio Blanco County							2	93.913	6203	3220.97	9
8105	CO	Rio Grande County							6	178.382	11508	911.605	7
8107	CO	Routt County							6	227.078	17941	2361.59	7
8109	CO	Saguache County							7	116.519	6176	3168.44	9
8111	CO	San Juan County							1	50.6288	522	387.423	9
8113	CO	San Miguel County								102.426	5464	1286.5	9
8115	CO	Sedgwick County								78.918	2587	548.236	9
8117	CO	Summit County							7	496.817	19610	608.162	7
8119	CO	Teller County							5	226.106	21228	557.063	2
8121	CO	Washington County							1	150.044	4357	2520.98	9
8123	CO	Weld County							44	2129.17	165805	3992.45	3
8125	CO	Yuma County							3	145.18	9430	2365.79	7
9001	CT	Fairfield County							59	7581.23	841334	625.802	2
9003	CT	Hartford County							59	7770.16	829671	735.44	1
9005	CT	Litchfield County							22	1117.17	182399	919.922	4
9007	CT	Middlesex County							16	1478.28	151461	369.263	1
9009	CT	New Haven County							87	6625.94	793208	605.638	2
9011	CT	New London County							28	2806.73	246049	665.915	2
9013	CT	Tolland County							14	1377.89	132668	410.071	1
9015	CT	Windham County							16	1168.64	105241	512.753	4
10001	DE	Kent County							16	1571.54	126048	589.721	3
10003	DE	New Castle County							55	4853.57	487182	426.266	1
10005	DE	Sussex County							29	2117.22	140308	937.577	4
11001	DC	District of Columbia							41	3462.53	519000	61.4033	1
12001	FL	Alachua County			1675	3874	3355	48	47	1925	198484	874.245	3
12003	FL	Baker County			81	248	259	10	10	503.066	21181	585.212	1
12005	FL	Bay County			725	1979	2045	28	28	1126.54	147958	763.678	3
12007	FL	Bradford County			77	223	237	3	3	276.612	24872	293.133	6
12009	FL	Brevard County			1589	4713	4986	81	81	4771.63	470365	1018.19	2
12011	FL	Broward County			10869	27435	25936	214	211	12852.2	1535468	1205.4	1
12013	FL	Calhoun County			21	110	141	1	1	136.119	12436	567.311	6
12015	FL	Charlotte County			633	1580	1516	31	30	1183.32	136992	693.604	3
12017	FL	Citrus County			314	976	1124	26	24	1298.71	116111	583.811	4
12019	FL	Clay County			537	1303	1239	16	16	1112.21	141353	601.107	1
12021	FL	Collier County			1131	2771	2638	60	60	2219.44	207029	2025.34	2
12023	FL	Columbia County			172	654	797	18	18	1202.6	53738	797.047	6
12027	FL	DeSoto County			83	304	417	14	14	278.031	24636	637.266	6
12029	FL	Dixie County			42	126	139	3	3	141.432	12919	704.015	6
12031	FL	Duval County			6374	13664	11020	116	117	8279.91	738483	773.668	1
12033	FL	Escambia County			1228	3820	4227	38	37	3108.97	282432	662.353	2
12035	FL	Flagler County			99	382	426	16	16	723.264	49110	484.996	4
12037	FL	Franklin County			35	98	98	1	1	80.9036	9978	544.34	6
12039	FL	Gadsden County			224	631	716	21	22	873.586	44077	516.132	2
12041	FL	Gilchrist County			46	127	142	6	6	153.8	14056	348.892	3
12043	FL	Glades County			27	90	98	8	8	95.1374	8693	773.645	6
12045	FL	Gulf County			45	143	157	1	1	103.66	13562	554.597	6
12047	FL	Hamilton County			28	114	175	2	2	494.228	12785	514.862	6
12049	FL	Hardee County			81	256	307	14	16	197.249	21017	637.301	6
12051	FL	Hendry County			112	364	427	14	16	277.744	29463	1152.53	4
12053	FL	Hernando County			282	1231	1526	25	25	983.383	128482	478.309	1
12055	FL	Highlands County			134	583	725	30	29	649.629	74795	1028.27	4
12057	FL	Hillsborough County			6859	18091	17864	197	198	8246.59	940484	1050.91	1
12059	FL	Holmes County			19	133	161	7	7	277.485	18761	482.449	6
12061	FL	Indian River County			517	1233	1211	22	22	943.459	100253	503.231	3
12063	FL	Jackson County			108	492	649	25	25	878.767	44549	915.644	6
12065	FL	Jefferson County			31	163	198	12	12	355.867	13090	597.736	2
12067	FL	Lafayette County			32	84	75	2	2	70.9506	6477	542.836	8
12069	FL	Lake County			796	2239	2230	47	47	2366.46	209812	953.15	1
12071	FL	Lee County			1786	4919	4974	99	99	4433.28	400542	803.63	2
12073	FL	Leon County			3060	5886	4302	16	16	1599.11	215926	666.74	2
12075	FL	Levy County			121	402	475	16	17	354.464	32386	1118.38	8
12077	FL	Liberty County			15	79	99	1	1	73.3433	6703	835.866	8
12079	FL	Madison County			69	251	301	10	10	568.336	17919	691.795	6
12081	FL	Manatee County			1249	3368	3465	58	58	2075.81	243531	741.027	2
12083	FL	Marion County			841	2939	3543	74	75	2770.49	245975	1578.86	2
12085	FL	Martin County			516	1436	1510	26	26	1155.88	118117	555.616	2
12086	FL	Miami-Dade County			24774	49804	40641	316		14492.3	2175634	1946.06	1
12087	FL	Monroe County			478	1363	1220	25	25	920.214	79941	996.915	4
12089	FL	Nassau County			183	542	601	18	18	800.956	56811	651.552	1
12091	FL	Okaloosa County			610	1747	1760	16	17	1610.45	170049	935.626	3
12093	FL	Okeechobee County			135	414	452	7	7	263.211	32386	773.943	4
12095	FL	Orange County			5705	16604	16974	153	154	8600.39	817206	907.449	1
12097	FL	Osceola County			717	2272	2693	50	47	861.764	150596	1321.9	1
12099	FL	Palm Beach County			5052	14387	14741	189	190	8679.37	1049420	1974.11	1
12101	FL	Pasco County			1252	4104	4736	79	82	3195.88	330704	744.848	1
12103	FL	Pinellas County			4935	13196	13243	116	119	7475.28	878499	279.917	1
12105	FL	Polk County			2755	7220	7379	123	121	4309.03	457347	1874.38	2
12107	FL	Putnam County			459	1039	936	19	19	777.033	70215	721.89	4
12109	FL	St. Johns County			595	1607	1624	45	46	1761.31	119685	609.01	1
12111	FL	St. Lucie County			776	2086	2176	31	31	1699.2	181850	572.445	2
12113	FL	Santa Rosa County			242	1114	1468	15	14	1454.1	120952	1016.93	2
12115	FL	Sarasota County			1551	4229	4180	35	36	2701.73	306546	571.551	2
12117	FL	Seminole County			1308	3284	2874	40	40	3648.37	357390	308.204	1
12119	FL	Sumter County			160	561	698	33	31	747.741	42754	545.729	4
12121	FL	Suwannee County			195	470	445	14	14	726.625	32972	687.64	6
12123	FL	Taylor County			86	242	244	15	15	181.41	19049	1041.91	6
12125	FL	Union County			16	88	108	3	3	67.457	12720	240.285	6
12127	FL	Volusia County			2655	6468	5784	86	84	4366.26	425601	1103.25	2
12129	FL	Wakulla County			61	231	294	6	7	209.944	19179	606.659	2
12131	FL	Walton County			124	500	671	16	16	744.671	38124	1057.56	6
12133	FL	Washington County			39	196	254	12	12	389.515	20614	579.929	6
13001	GA	Appling County					194	4	4	152.528	16675	508.507	7
13003	GA	Atkinson County					29	3	3	84.7722	7295	338.043	9
13005	GA	Bacon County					79	4	4	80.2261	10365	284.949	7
13007	GA	Baker County					27	2	2	30.86	3617	343.22	3
13009	GA	Baldwin County					875	8	7	485.296	42181	258.445	4
13011	GA	Banks County					125	8	8	237.162	13166	233.671	8
13013	GA	Barrow County					545	9	9	514.49	41891	162.171	1
13015	GA	Bartow County					1223	16	16	1144.21	74607	459.426	1
13017	GA	Ben Hill County					189	2	2	175.617	17474	251.794	7
13019	GA	Berrien County					113	5	5	135.465	16529	452.413	6
13021	GA	Bibb County					3987	15	15	1463.63	155441	249.962	3
13023	GA	Bleckley County					124	5	5	109.615	11314	217.395	6
13025	GA	Brantley County					99	2	2	161.703	13895	444.401	3
13027	GA	Brooks County					146	3	3	186.414	16122	493.621	3
13029	GA	Bryan County					260	1	1	502.356	24394	441.71	2
13031	GA	Bulloch County					566	13	14	920.946	50777	682.072	4
13033	GA	Burke County					361	13	13	268.646	23217	830.471	2
13035	GA	Butts County					235	6	6	182.144	18380	186.612	1
13037	GA	Calhoun County					105	3	3	42.0693	4936	280.181	8
13039	GA	Camden County					348	3	3	907.901	47032	629.913	4
13043	GA	Candler County					114	6	7	268.709	8953	246.875	7
13045	GA	Carroll County					1325	26	25	1241.17	84765	498.933	1
13047	GA	Catoosa County					599	10	10	599.57	52100	162.225	2
13049	GA	Charlton County					84	2	2	110.143	9462	780.771	6
13051	GA	Chatham County					4554	26	26	2449.02	225662	438.114	2
13053	GA	Chattahoochee County					12	1	1	43.61	16654	248.769	2
13055	GA	Chattooga County					191	6	6	256.887	22858	313.328	6
13057	GA	Cherokee County					1393	22	22	1571.45	141686	423.678	1
13059	GA	Clarke County					1930	12	12	722.43	90638	120.791	3
13061	GA	Clay County					27	2	2	40.9954	3524	195.208	9
13063	GA	Clayton County					4111	28	27	2975.16	213727	142.622	1
13065	GA	Clinch County					66	4	4	49.501	6677	809.288	6
13067	GA	Cobb County					9887	54	55	7168.78	583541	340.15	1
13069	GA	Coffee County					234	6	6	403.95	34958	598.896	7
13071	GA	Colquitt County					503	12	12	469.974	40724	552.268	6
13073	GA	Columbia County					938	11	10	908.036	93312	290.015	2
13075	GA	Cook County					185	3	3	395.053	15197	229.018	6
13077	GA	Coweta County					1081	14	14	1349.07	89401	442.617	1
13079	GA	Crawford County					36	1	1	124.135	10414	325.007	3
13081	GA	Crisp County					388	10	10	437.771	20637	273.818	6
13083	GA	Dade County					188	10	10	445.526	15344	173.978	2
13085	GA	Dawson County					193	2	2	185.554	15945	211.037	1
13087	GA	Decatur County					341	6	6	320.081	27128	596.799	6
13089	GA	DeKalb County					12409	70	70	8872.13	596853	268.206	1
13091	GA	Dodge County					157	8	8	209.915	18146	500.286	7
13093	GA	Dooly County					127	1	1	304.557	10433	392.879	6
13095	GA	Dougherty County					1730	10	10	672.917	94080	329.599	3
13097	GA	Douglas County					1117	14	13	1160.87	91175	199.299	1
13099	GA	Early County					23	4	4	139.733	12127	511.232	6
13101	GA	Echols County					17	1	1	29.458	2534	404.126	3
13103	GA	Effingham County					286	8	8	344.149	38370	479.414	2
13105	GA	Elbert County					254	6	6	223.984	19363	368.755	6
13107	GA	Emanuel County					232	7	7	377.013	21042	685.789	7
13109	GA	Evans County					65	2	2	117.4	10089	184.921	6
13111	GA	Fannin County					244	6	6	163.933	18945	385.74	8
13113	GA	Fayette County					1003	9	9	1055.88	92378	197.05	1
13115	GA	Floyd County					1723	21	21	822.986	85512	513.13	3
13117	GA	Forsyth County					1158	24	24	1062.41	96686	225.795	1
13119	GA	Franklin County					306	12	10	475.398	19311	263.295	8
13121	GA	Fulton County					19117	114	113	10732.7	744827	528.658	1
13123	GA	Gilmer County					171	6	6	229.982	19766	426.687	6
13125	GA	Glascock County					12	0		21.6423	2544	144.141	9
13127	GA	Glynn County					996	20	20	676.753	67945	422.368	3
13129	GA	Gordon County					751	14	14	613.574	41966	355.535	6
13131	GA	Grady County					223	13	13	249.154	21600	458.124	6
13133	GA	Greene County					208	1	1	307.062	14094	388.276	6
13135	GA	Gwinnett County					8771	71	68	6257.15	545632	432.73	1
13137	GA	Habersham County					486	7	7	340.366	32530	278.17	6
13139	GA	Hall County					2183	36	38	1612.76	123290	393.658	3
13141	GA	Hancock County					67	1	2	77.0944	9046	473.284	7
13143	GA	Haralson County					304	9	9	330.279	25070	282.112	1
13145	GA	Harris County					172	6	6	470.21	22634	463.692	2
13147	GA	Hart County					280	5	7	227.187	22124	232.209	6
13149	GA	Heard County					53	2	2	122.032	10490	296.028	1
13151	GA	Henry County					1554	21	21	1503.41	113443	322.712	1
13153	GA	Houston County					1398	10	10	906.625	107644	376.751	3
13155	GA	Irwin County					88	4	4	54.5342	9181	356.808	7
13157	GA	Jackson County					461	12	11	644.531	39057	342.362	6
13159	GA	Jasper County					122	2	2	90.2059	10589	370.423	1
13161	GA	Jeff Davis County					144	10	10	102.737	12714	333.385	7
13163	GA	Jefferson County					77	7	7	207.755	17858	527.65	6
13165	GA	Jenkins County					106	3	3	58.2204	8401	349.807	6
13167	GA	Johnson County					39	2	2	70.6938	8293	304.263	9
13169	GA	Jones County					250	9	9	237.082	23307	393.747	3
13171	GA	Lamar County					177	7	7	122.609	15010	184.821	1
13173	GA	Lanier County					91	6	6	81.0365	6959	186.825	3
13175	GA	Laurens County					610	17	17	926.207	43927	812.269	6
13177	GA	Lee County					132	1	1	234.689	23341	355.77	3
13179	GA	Liberty County					487	16	16	854.745	59694	519.052	3
13181	GA	Lincoln County					64	3	3	71.1055	8339	211.094	8
13183	GA	Long County					62	3	3	101.29	8709	400.919	3
13185	GA	Lowndes County					1282	19	19	1522.83	85413	504.221	3
13187	GA	Lumpkin County					317	4	4	187.09	19772	284.469	6
13189	GA	McDuffie County					273	16	15	406.245	21814	259.773	2
13191	GA	McIntosh County					204	6	6	367.277	10114	433.449	3
13193	GA	Macon County					127	5	5	80.0118	13126	403.284	6
13195	GA	Madison County					243	9	8	293.256	25208	283.88	3
13197	GA	Marion County					58	1	1	57.7454	6779	366.999	2
13199	GA	Meriwether County					230	9	9	224.63	23043	503.282	1
13201	GA	Miller County					42	1	1	73.5385	6318	283.046	8
13205	GA	Mitchell County					151	4	4	244.692	21219	511.957	6
13207	GA	Monroe County					316	15	15	498.555	20032	395.63	3
13209	GA	Montgomery County					39	0		91.0924	7854	245.325	9
13211	GA	Morgan County					166	6	6	451.085	15437	349.635	6
13213	GA	Murray County					422	9	9	356.71	33922	344.411	3
13215	GA	Muscogee County					2968	17	17	1501.49	182058	216.258	2
13217	GA	Newton County					970	12	12	916.706	60583	276.433	1
13219	GA	Oconee County					267	6	6	276.901	24526	185.705	3
13221	GA	Oglethorpe County					70	6	6	134.543	11564	441.111	3
13223	GA	Paulding County					654	16	16	874.886	79587	313.43	1
13225	GA	Peach County					337	2	2	439.623	24996	151.058	6
13227	GA	Pickens County					167	4	2	192.785	21024	232.129	1
13229	GA	Pierce County					61	3	5	142.795	15804	343.252	6
13231	GA	Pike County					107	3	3	111.685	13104	218.374	1
13233	GA	Polk County					462	12	12	423.302	36627	311.141	6
13235	GA	Pulaski County					59	3	3	60.2176	8359	247.423	6
13237	GA	Putnam County					260	4	4	149.639	18199	344.53	6
13239	GA	Quitman County					18	0		28.481	2449	151.543	9
13241	GA	Rabun County					214	3	3	159.263	13687	371.048	9
13243	GA	Randolph County					60	5	5	42.5121	8012	429.246	6
13245	GA	Richmond County					3008	27	27	1819.29	190310	324.037	2
13247	GA	Rockdale County					997	8	8	819.102	68968	130.631	1
13249	GA	Schley County					22	0		33.6778	3949	167.606	8
13251	GA	Screven County					149	6	6	137.776	14463	648.441	6
13253	GA	Seminole County					130	1	1	83.449	9803	238.038	6
13255	GA	Spalding County					1043	11	11	708.106	57825	197.951	1
13257	GA	Stephens County					355	3	4	292.585	25332	179.257	7
13259	GA	Stewart County					38	0		62.5455	5374	458.699	8
13261	GA	Sumter County					420	2	2	360.971	31362	485.283	6
13263	GA	Talbot County					104	2	2	79.6052	6969	393.213	8
13265	GA	Taliaferro County					38	1	1	146.863	1924	195.389	8
13267	GA	Tattnall County					169	6	6	182.584	19171	483.693	6
13269	GA	Taylor County					113	3	3	96.3906	8287	377.44	8
13271	GA	Telfair County					106	4	4	100.948	11406	441.091	7
13273	GA	Terrell County					96	4	4	129.072	11205	335.369	3
13275	GA	Thomas County					544	10	10	494.748	42896	548.304	4
13277	GA	Tift County					575	20	20	669.136	36975	265.049	4
13279	GA	Toombs County					289	9	9	298.537	25990	366.649	7
13281	GA	Towns County					71	2	2	102.344	8800	166.663	9
13283	GA	Treutlen County					91	3	3	270.182	5933	200.66	7
13285	GA	Troup County					849	24	23	1297.53	58801	413.905	4
13287	GA	Turner County					127	7	7	257.194	9249	286.028	6
13289	GA	Twiggs County					131	8	9	411.747	10198	360.288	3
13291	GA	Union County					187	5	5	149.173	17234	322.549	9
13293	GA	Upson County					411	4	4	257.884	27079	325.483	6
13295	GA	Walker County					588	11	11	533.23	62963	446.58	2
13297	GA	Walton County					663	11	11	596.954	58498	329.18	1
13299	GA	Ware County					581	7	7	416.203	35232	902.293	4
13301	GA	Warren County					97	7	7	243.13	6075	285.522	8
13303	GA	Washington County					135	5	5	233.433	20198	680.341	7
13305	GA	Wayne County					199	13	13	295.627	25610	644.662	6
13307	GA	Webster County					12	1	1	19.1118	2203	209.536	8
13309	GA	Wheeler County					69	5	5	56.6164	4864	297.716	9
13311	GA	White County					276	8	8	211.759	18195	241.578	8
13313	GA	Whitfield County					1386	18	18	1238.43	83220	289.985	3
13315	GA	Wilcox County					26	1	1	86.2945	7419	380.296	9
13317	GA	Wilkes County					77	6	6	79.4388	10556	471.374	6
13319	GA	Wilkinson County					120	5	4	126.987	10908	446.557	8
13321	GA	Worth County					235	6	6	260.119	22483	569.727	3
15001	HI	Hawaii County							31	1312.73	142390	4028.02	5
15003	HI	Honolulu County							43	5376.39	864571	599.766	2
15005	HI	Kalawao County								0.2236	58	13.2055	9
15007	HI	Kauai County							8	560.869	56539	622.439	5
15009	HI	Maui County							16	866.455	121939	1159.2	5
16001	ID	Ada County	14	2289		5918	3301	15	13	2729.55	283402	1054.99	2
16003	ID	Adams County	5	30		106	59	6	3	44.9707	3787	1364.58	8
16005	ID	Bannock County	15	525		1647	790	16	16	773.957	74881	1113.3	3
16007	ID	Bear Lake County	0	31		74	54	0	1	56.3558	6561	971.381	7
16009	ID	Benewah County	3	60		205	84	3	3	126.793	9066	776.069	6
16011	ID	Bingham County	9	267		634	444	9	9	592.824	42127	2094.73	6
16013	ID	Blaine County	4	70		274	112	4	4	137.433	17326	2644.78	7
16015	ID	Boise County	2	77		160	112	3	3	74.2779	5311	1902.46	2
16017	ID	Bonner County	5	241		643	372	6	7	441.671	36071	1737.67	6
16019	ID	Bonneville County	17	676		1883	1070	19	18	659.431	81536	1868.48	3
16021	ID	Boundary County	4	63		204	110	4	4	139.531	9977	1268.81	7
16023	ID	Butte County	3	15		41	27	3	3	40.6285	3012	2232.85	8
16025	ID	Camas County	2	14		39	28	2	2	10.2518	865	1074.96	9
16027	ID	Canyon County	19	857		2326	1261	22	24	1374.34	124442	589.718	2
16029	ID	Caribou County	5	45		109	68	5	4	58.7915	7273	1766.01	6
16031	ID	Cassia County	11	242		674	412	11	11	389.907	21573	2566.45	7
16033	ID	Clark County	4	23		75	34	4	4	155.875	913	1764.63	8
16035	ID	Clearwater County	1	60		179	82	1	1	76.1032	9359	2461.4	6
16037	ID	Custer County	5	25		63	37	5	5	57.1566	4089	4925.45	9
16039	ID	Elmore County	10	217		445	335	10	11	481.386	25627	3077.57	4
16041	ID	Franklin County	4	83		237	156	5	5	70.2708	11350	665.434	3
16043	ID	Fremont County	5	49		168	90	8	8	123.013	11890	1866.76	6
16045	ID	Gem County	4	67		157	118	5	5	95.5841	15145	562.577	2
16047	ID	Gooding County	9	95		245	159	9	10	219.933	13743	730.781	7
16049	ID	Idaho County	9	123		321	187	12	12	163.67	15030	8484.88	6
16051	ID	Jefferson County	3	116		282	209	3	4	359.567	19949	1095.08	3
16053	ID	Jerome County	4	159		428	268	5	7	303.261	18110	599.836	7
16055	ID	Kootenai County	10	854		2167	1248	11	10	1230.26	104807	1245.12	3
16057	ID	Latah County	6	190		646	281	9	9	280.567	32509	1076.65	4
16059	ID	Lemhi County	2	32		81	43	2	2	66.6346	7978	4564.16	7
16061	ID	Lewis County	1	37		107	52	1	2	46.8429	3943	479.043	8
16063	ID	Lincoln County	3	31		84	47	4	2	53.6938	3839	1205.53	9
16065	ID	Madison County	2	139		475	214	4	4	214.261	24806	471.525	6
16067	ID	Minidoka County	3	129		355	207	4	4	227.562	20284	759.623	7
16069	ID	Nez Perce County	5	248		692	324	5	4	244.404	36913	849.08	3
16071	ID	Oneida County	2	45		142	89	3	3	187.852	4062	1200.33	8
16073	ID	Owyhee County	5	48		136	78	5	4	145.507	10406	7677.98	2
16075	ID	Payette County	7	121		305	209	8	8	296.761	20846	407.517	6
16077	ID	Power County	3	80		190	125	3	3	203.753	8404	1405.57	3
16079	ID	Shoshone County	3	90		262	130	4	9	243.605	13654	2633.91	6
16081	ID	Teton County	1	28		86	60	1	1	56.0849	5708	450.364	9
16083	ID	Twin Falls County	14	553		1453	814	17	14	557.013	62970	1925.03	5
16085	ID	Valley County	0	64		224	94	0		93.3324	7858	3677.82	8
16087	ID	Washington County	2	48		134	75	2	2	71.2826	10298	1456.32	6
17001	IL	Adams County				729	232	12	12	609.544	66951	856.634	5
17003	IL	Alexander County				133	76	1	1	96.8	9919	236.382	7
17005	IL	Bond County				268	75	5	5	300.208	17155	380.203	1
17007	IL	Boone County				358	193	12	12	399.523	39560	281.265	2
17009	IL	Brown County				112	24	0		82.2716	6918	305.649	7
17011	IL	Bureau County				598	218	4	4	654.04	35355	868.564	6
17013	IL	Calhoun County				96	11	1	1	57.82	4862	253.816	1
17015	IL	Carroll County				231	78	7	7	156.347	16691	444.212	7
17017	IL	Cass County				131	43	4	4	116.897	13256	375.901	6
17019	IL	Champaign County				1709	750	17	17	1574.38	170272	996.806	3
17021	IL	Christian County				374	129	8	8	287.716	35797	709.061	6
17023	IL	Clark County				278	88	3	3	311.42	16551	501.503	6
17025	IL	Clay County				139	32	3	3	133.264	14315	469.249	7
17027	IL	Clinton County				346	139	15	15	373.763	35682	474.233	1
17029	IL	Coles County				796	306	14	14	465.691	51806	508.286	5
17031	IL	Cook County				56751	18976	398	398	42741.3	5192326	945.68	1
17033	IL	Crawford County				265	52	3	3	191.391	20854	443.535	6
17035	IL	Cumberland County				235	88	5	5	302.609	11101	346.017	9
17037	IL	DeKalb County				877	436	14	14	724.289	86993	634.156	1
17039	IL	De Witt County				240	73	3	3	176.429	16676	397.576	6
17041	IL	Douglas County				203	83	8	8	237.822	19872	416.862	6
17043	IL	DuPage County				13469	4878	54	54	6402.56	892547	333.606	1
17045	IL	Edgar County				221	64	2	2	162.028	19528	623.555	6
17047	IL	Edwards County				86	21	2	2	81.8021	6874	222.348	9
17049	IL	Effingham County				988	353	19	19	601.906	33786	478.7	7
17051	IL	Fayette County				362	115	8	8	430.899	22022	716.487	6
17053	IL	Ford County				160	71	2	2	126.103	14045	485.899	3
17055	IL	Franklin County				770	272	13	13	370.67	40365	412.075	5
17057	IL	Fulton County				572	157	10	10	307.915	38679	865.624	6
17059	IL	Gallatin County				42	21	3	3	78.3838	6586	323.728	8
17061	IL	Greene County				185	42	2	2	126.441	15737	543.091	6
17063	IL	Grundy County				633	235	12	12	525.133	37181	419.903	1
17065	IL	Hamilton County				112	44	2	2	54.2899	8583	435.164	7
17067	IL	Hancock County				263	63	1	1	184.629	20965	794.622	7
17069	IL	Hardin County				78	28	1	1	43.6162	4907	178.333	9
17071	IL	Henderson County				157	61	4	4	102.21	8593	378.812	9
17073	IL	Henry County				781	297	8	8	711.468	51862	823.212	2
17075	IL	Iroquois County				483	253	20	20	589.333	31196	1116.43	6
17077	IL	Jackson County				1079	440	10	10	439.468	60651	588.125	5
17079	IL	Jasper County				159	48	3	3	68.4414	10571	494.404	7
17081	IL	Jefferson County				879	329	8	8	657.689	39188	570.956	7
17083	IL	Jersey County				415	173	9	9	195.822	21573	369.157	1
17085	IL	Jo Daviess County				356	120	10	10	225.459	21562	601.08	6
17087	IL	Johnson County				260	74	2	2	340.355	13598	344.627	7
17089	IL	Kane County				4644	1784	41	41	839.078	402622	520.436	1
17091	IL	Kankakee County				1495	734	25	25	899.129	102720	676.749	3
17093	IL	Kendall County				746	300	13	13	277.604	53659	320.579	1
17095	IL	Knox County				609	271	3	3	550.367	55373	716.281	4
17097	IL	Lake County				11931	4249	54	54	3433.74	617975	447.564	1
17099	IL	La Salle County				1495	530	27	27	1190.6	110248	1134.92	4
17101	IL	Lawrence County				217	73	6	6	128.575	15149	371.984	7
17103	IL	Lee County				583	211	5	5	647.083	35734	725.364	4
17105	IL	Livingston County				477	214	9	9	532.592	39639	1043.76	4
17107	IL	Logan County				446	152	8	8	536.413	31733	618.14	6
17109	IL	McDonough County				381	105	3	3	236.896	35228	589.27	5
17111	IL	McHenry County				3197	1240	33	33	783.061	246812	603.508	1
17113	IL	McLean County				1889	724	13	13	1676.88	145477	1183.53	3
17115	IL	Macon County				1713	657	7	7	1032.58	113219	580.523	3
17117	IL	Macoupin County				452	164	8	8	518.628	49020	863.574	1
17119	IL	Madison County				4396	1913	41	41	2728.22	259434	725.018	1
17121	IL	Marion County				712	232	5	5	547.481	41813	572.264	4
17123	IL	Marshall County				207	60	6	6	210.705	12974	386.062	2
17125	IL	Mason County				129	31	1	1	158.406	16797	538.943	6
17127	IL	Massac County				287	76	4	4	197.329	15414	239.054	7
17129	IL	Menard County				113	33	8	8	112.98	12724	314.247	3
17131	IL	Mercer County				140	48	2	2	168.124	17644	561.024	2
17133	IL	Monroe County				382	139	4	4	263.189	27289	388.292	1
17135	IL	Montgomery County				432	149	9	9	453.654	31318	703.795	6
17137	IL	Morgan County				448	152	8	8	412.351	35158	568.757	4
17139	IL	Moultrie County				173	56	5	5	122.697	14573	335.596	6
17141	IL	Ogle County				676	188	11	11	623.384	50954	758.833	4
17143	IL	Peoria County				2737	1125	24	24	1698.46	181126	619.522	2
17145	IL	Perry County				366	110	4	4	175.492	21330	440.961	7
17147	IL	Piatt County				136	59	3	3	280.753	16623	440.022	3
17149	IL	Pike County				571	102	10	10	417.367	17220	830.299	7
17151	IL	Pope County				71	10	0		42.7504	4811	370.863	9
17153	IL	Pulaski County				136	32	3	3	185.201	7304	200.786	9
17155	IL	Putnam County				99	37	6	6	75.9017	5853	159.796	8
17157	IL	Randolph County				399	129	6	6	278.049	33600	578.416	6
17159	IL	Richland County				313	140	1	1	129.73	16654	360.142	7
17161	IL	Rock Island County				2030	836	18	18	1331.41	147522	426.751	2
17163	IL	St. Clair County				4782	2190	53	53	2816.18	260050	663.808	1
17165	IL	Saline County				459	160	6	6	203.426	26044	383.309	7
17167	IL	Sangamon County				2484	889	21	21	2041.62	191306	868.182	3
17169	IL	Schuyler County				178	57	1	1	53.2826	7496	437.314	7
17171	IL	Scott County				73	11	1	1	166.993	5614	250.916	9
17173	IL	Shelby County				222	76	2	2	236.49	22505	758.511	6
17175	IL	Stark County				85	64	2	2	55.7804	6282	287.938	2
17177	IL	Stephenson County				617	225	8	8	353.389	48778	564.184	4
17179	IL	Tazewell County				1813	706	6	6	1249.5	129801	648.86	2
17181	IL	Union County				344	123	3	3	235.06	18023	416.161	7
17183	IL	Vermilion County				909	439	18	18	777.949	83813	899.08	3
17185	IL	Wabash County				126	25	2	2	86.8761	12513	223.471	6
17187	IL	Warren County				208	90	5	5	151.803	18931	542.521	7
17189	IL	Washington County				321	106	11	11	319.386	15200	562.608	6
17191	IL	Wayne County				285	96	5	5	331.026	16967	713.898	7
17193	IL	White County				278	71	1	1	243.1	15566	494.87	6
17195	IL	Whiteside County				795	284	4	4	678.039	59606	684.77	4
17197	IL	Will County				6555	2670	60	60	2105.71	478392	836.941	1
17199	IL	Williamson County				1022	436	13	13	601.263	61550	423.414	5
17201	IL	Winnebago County				3079	1299	47	47	2439.93	268126	513.737	2
17203	IL	Woodford County				415	191	11	11	530.365	35553	527.95	2
18001	IN	Adams County	2	207	681	890	332	3	3	364.923	33168	339.36	6
18003	IN	Allen County	48	2834	10203	13085	4090	56	55	3254.08	316471	657.25	2
18005	IN	Bartholomew County	11	644	1719	2374	1015	12	12	928.651	69714	406.838	3
18007	IN	Benton County	3	41	168	212	63	5	5	132.029	9776	406.31	3
18009	IN	Blackford County	2	92	324	418	126	3	3	119.783	13927	165.097	6
18011	IN	Boone County	5	237	1112	1354	333	7	7	705.883	44835	422.853	1
18013	IN	Brown County	3	62	319	384	86	4	4	216.105	15992	312.264	1
18015	IN	Carroll County	3	131	464	598	179	3	3	237.941	20004	372.258	3
18017	IN	Cass County	7	357	1353	1717	544	7	7	436.135	38964	412.868	4
18019	IN	Clark County	12	955	2889	3856	1379	13	13	1232.91	95121	375.039	1
18021	IN	Clay County	3	157	712	872	238	4	4	372.46	26903	357.617	3
18023	IN	Clinton County	8	214	876	1098	314	12	13	449.507	32964	405.096	6
18025	IN	Crawford County	2	78	277	357	117	2	2	290.286	10739	305.681	8
18027	IN	Daviess County	5	218	613	836	314	6	6	279.399	29084	430.658	7
18029	IN	Dearborn County	8	397	1364	1769	599	8	8	580.312	48011	305.212	1
18031	IN	Decatur County	10	173	637	820	251	10	10	508.363	25704	372.604	6
18033	IN	DeKalb County	5	229	1146	1380	343	7	6	593.631	39683	362.878	4
18035	IN	Delaware County	13	1038	3122	4173	1508	14	14	1214.8	115472	393.292	3
18037	IN	Dubois County	6	323	1171	1500	453	7	7	466.522	40093	430.086	7
18039	IN	Elkhart County	20	1742	5785	7547	2575	20	20	2045.36	174680	463.814	3
18041	IN	Fayette County	5	161	737	903	229	5	5	250.562	25860	214.963	7
18043	IN	Floyd County	3	666	2013	2682	954	3	3	826.421	72243	147.999	1
18045	IN	Fountain County	6	104	481	591	172	6	6	300.184	18374	395.691	6
18047	IN	Franklin County	5	159	520	684	258	5	5	296.4	22120	386.003	1
18049	IN	Fulton County	7	143	442	592	220	10	10	239.902	20893	368.508	7
18051	IN	Gibson County	8	236	833	1077	362	9	9	416.602	32230	488.784	2
18053	IN	Grant County	13	541	2179	2733	780	14	14	921.969	72082	414.029	4
18055	IN	Greene County	12	190	703	905	300	13	13	389.398	33158	541.728	3
18057	IN	Hamilton County	14	1048	3792	4854	1509	14	14	1725.17	172094	397.94	1
18059	IN	Hancock County	10	423	1072	1505	667	11	11	698.359	55617	306.125	1
18061	IN	Harrison County	4	279	964	1247	427	4	4	502.422	35376	485.217	1
18063	IN	Hendricks County	19	598	2118	2735	820	22	24	1186.76	98826	408.394	1
18065	IN	Henry County	8	303	1095	1406	464	8	8	742.593	48377	392.927	4
18067	IN	Howard County	11	771	2111	2893	1162	13	13	913.975	83736	293.067	3
18069	IN	Huntington County	8	243	986	1237	374	9	9	615.516	37377	382.593	6
18071	IN	Jackson County	7	371	1308	1686	531	10	10	652.208	41319	509.315	4
18073	IN	Jasper County	6	241	804	1051	402	7	7	679.939	29462	559.866	1
18075	IN	Jay County	3	134	519	656	184	6	6	234.501	21686	383.637	6
18077	IN	Jefferson County	6	205	740	951	341	6	6	323.177	31813	361.365	6
18079	IN	Jennings County	11	232	779	1022	361	12	12	339.401	28106	377.224	6
18081	IN	Johnson County	12	680	2199	2891	968	12	12	1292.54	112724	320.193	1
18083	IN	Knox County	3	358	910	1271	516	3	3	407.312	39051	515.834	4
18085	IN	Kosciusko County	15	521	1976	2512	763	22	22	861.609	71336	537.503	4
18087	IN	LaGrange County	13	180	948	1141	272	19	19	591.689	33997	379.563	6
18089	IN	Lake County	51	4636	14807	19494	6949	55	55	4768.73	480619	496.985	1
18091	IN	LaPorte County	16	1034	3193	4243	1496	17	17	1465.31	109939	598.238	3
18093	IN	Lawrence County	4	340	948	1292	497	4	4	513.667	45752	448.831	4
18095	IN	Madison County	26	1058	3496	4580	1573	32	32	1478.67	130990	452.13	3
18097	IN	Marion County	85	8248	25964	34297	1190	94	94	9262.54	810946	396.249	1
18099	IN	Marshall County	18	349	1315	1682	547	23	23	547.853	46129	444.274	6
18101	IN	Martin County	5	71	247	323	92	5	4	105.494	10379	336.136	6
18103	IN	Miami County	5	239	927	1171	361	5	5	371.618	33605	375.619	6
18105	IN	Monroe County	9	911	3213	4133	1276	11	11	1000.32	116923	394.346	3
18107	IN	Montgomery County	9	283	974	1266	416	10	10	643.633	36583	504.511	6
18109	IN	Morgan County	13	394	1281	1688	560	17	17	887.441	67003	406.471	1
18111	IN	Newton County	5	91	333	429	144	6	6	229.317	14844	401.849	1
18113	IN	Noble County	11	293	1292	1596	450	12	12	502.267	43241	411.112	6
18115	IN	Ohio County	1	52	203	256	67	1	1	55.2514	5457	86.7235	1
18117	IN	Orange County	5	115	517	637	157	5	5	222.17	19835	399.521	6
18119	IN	Owen County	3	134	469	606	193	3	3	242.24	20619	385.178	3
18121	IN	Parke County	3	136	471	610	199	3	3	145.605	16908	444.774	6
18123	IN	Perry County	2	106	482	590	151	3	3	332.557	19091	381.394	6
18125	IN	Pike County	3	87	312	402	128	4	4	176.018	13021	336.176	6
18127	IN	Porter County	23	1239	3522	4784	1849	26	26	1615.9	147758	418.11	1
18129	IN	Posey County	6	118	443	567	164	7	7	482.826	26292	408.5	2
18131	IN	Pulaski County	3	91	450	544	127	3	3	182.737	13527	433.676	6
18133	IN	Putnam County	9	245	830	1084	353	10	11	607.359	34788	480.311	1
18135	IN	Randolph County	2	112	526	640	145	4	4	323.842	27417	452.833	6
18137	IN	Ripley County	8	195	694	897	286	9	9	405.481	27660	446.361	6
18139	IN	Rush County	4	142	371	517	213	7	7	210.448	18208	408.283	6
18141	IN	St. Joseph County	30	2308	7357	9695	3376	32	31	2292.93	258537	457.341	2
18143	IN	Scott County	4	216	563	783	320	5	5	347.888	23433	190.388	6
18145	IN	Shelby County	8	389	1007	1404	556	8	8	607.889	43630	412.639	1
18147	IN	Spencer County	7	148	548	703	223	8	8	378.577	21178	398.686	8
18149	IN	Starke County	10	164	565	739	260	10	10	272.615	23597	309.311	6
18151	IN	Steuben County	4	245	1346	1595	358	4	4	712.853	31742	308.724	7
18153	IN	Sullivan County	1	99	352	452	208	1	1	227.481	21535	447.196	3
18155	IN	Switzerland County	2	45	272	319	71	2	2	90.6557	8961	221.181	8
18157	IN	Tippecanoe County	16	1216	5666	6898	1747	19	19	1347.49	142475	499.792	3
18159	IN	Tipton County	3	78	274	355	119	3	3	183.503	16641	260.385	3
18161	IN	Union County	1	43	165	209	62	1	1	98.5527	7297	161.548	8
18163	IN	Vanderburgh County	10	1632	5093	6735	2384	10	10	1756.98	167922	234.572	2
18165	IN	Vermillion County	5	115	374	494	183	5	5	268.416	16954	256.888	3
18167	IN	Vigo County	19	1113	3491	4623	1663	25	25	1358.7	104349	403.295	3
18169	IN	Wabash County	7	236	997	1240	365	8	8	370.259	34538	413.17	6
18171	IN	Warren County	4	47	229	280	69	4	5	112.755	8349	364.883	8
18173	IN	Warrick County	8	259	1114	1381	366	8	8	797.022	52557	384.075	2
18175	IN	Washington County	3	203	708	914	308	3	3	265.609	28233	514.416	1
18177	IN	Wayne County	9	749	2000	2758	1137	9	9	912.65	71134	403.566	5
18179	IN	Wells County	7	158	658	823	206	8	8	253.76	26810	369.959	2
18181	IN	White County	12	222	924	1158	345	13	13	414.915	25522	505.236	6
18183	IN	Whitley County	8	198	783	989	285	11	11	352.06	30811	335.519	2
19001	IA	Adair County	1	75	157	233	120	2	2	233.447	8066	569.302	8
19003	IA	Adams County	2	25	75	102	42	2	2	58.3335	4405	423.54	9
19005	IA	Allamakee County	1	81	190	272	137	1	1	135.483	14068	639.564	6
19007	IA	Appanoose County	2	117	199	318	186	2	2	125.463	13446	496.252	7
19009	IA	Audubon County	1	33	52	86	52	1	1	60.792	6802	443.131	8
19011	IA	Benton County	6	148	201	355	224	6	6	323.026	25798	716.389	3
19013	IA	Black Hawk County	9	1079	1414	2502	1623	9	9	1078.75	119959	567.114	3
19015	IA	Boone County	7	190	330	527	327	8	8	231.121	26300	571.46	6
19017	IA	Bremer County	5	135	286	426	221	5	5	230.941	23440	437.897	3
19019	IA	Buchanan County	5	130	240	375	222	6	6	272.333	21160	571.258	6
19021	IA	Buena Vista County	3	138	230	371	219	4	4	179.773	19404	574.784	7
19023	IA	Butler County	2	75	153	230	114	2	2	205.132	15499	580.379	8
19025	IA	Calhoun County	1	74	88	163	117	2	2	149.854	11319	570.15	9
19027	IA	Carroll County	3	141	302	446	215	5	5	197.843	21518	569.313	7
19029	IA	Cass County	1	131	236	368	194	1	1	292.715	14512	564.329	6
19031	IA	Cedar County	4	146	308	458	225	4	4	371.513	18056	579.522	6
19033	IA	Cerro Gordo County	11	411	805	1227	635	11	11	455.622	45669	568.326	5
19035	IA	Cherokee County	2	123	229	354	191	2	2	122.439	13060	577.151	6
19037	IA	Chickasaw County	2	61	157	220	112	3	4	131.749	13423	504.644	6
19039	IA	Clarke County	1	82	181	264	136	1	1	187.415	8273	431.116	6
19041	IA	Clay County	1	183	285	469	272	1	1	130.125	17245	568.887	7
19043	IA	Clayton County	7	106	342	455	156	14	14	245.967	18582	778.807	8
19045	IA	Clinton County	8	448	1011	1467	662	10	10	326.446	49612	694.98	4
19047	IA	Crawford County	8	102	276	386	152	10	10	158.995	16427	714.364	6
19049	IA	Dallas County	7	230	395	632	357	7	6	520.03	38210	586.465	2
19051	IA	Davis County	5	45	104	154	72	5	5	79.8844	8517	503.24	9
19053	IA	Decatur County	3	33	128	164	62	4	4	237.939	8319	531.804	9
19055	IA	Delaware County	5	118	288	411	171	6	6	196.529	18482	577.854	6
19057	IA	Des Moines County	3	284	706	993	415	3	3	285.713	41955	416.148	5
19059	IA	Dickinson County	2	153	289	444	243	2	2	162.968	16285	381.059	7
19061	IA	Dubuque County	10	718	881	1609	1129	10	10	676.464	88112	608.156	3
19063	IA	Emmet County	0	107	200	307	157	0		84.893	10638	395.743	7
19065	IA	Fayette County	7	120	280	407	194	8	7	227.455	21566	730.925	6
19067	IA	Floyd County	4	116	291	411	177	5	5	147.296	16256	500.565	7
19069	IA	Franklin County	1	93	230	324	155	1	1	232.458	10781	582.435	7
19071	IA	Fremont County	2	64	120	186	90	4	4	280.197	7706	511.08	8
19073	IA	Greene County	1	69	148	218	102	1	1	79.3355	10020	568.407	6
19075	IA	Grundy County	7	86	123	216	140	7	7	162.578	12284	502.514	3
19077	IA	Guthrie County	0	41	85	126	51	0		153.447	11591	590.601	2
19079	IA	Hamilton County	2	152	314	468	234	2	2	308.276	15905	576.68	6
19081	IA	Hancock County	1	88	122	211	142	2	2	120.581	12037	571.11	7
19083	IA	Hardin County	3	111	236	350	157	3	3	167.558	18159	569.257	6
19085	IA	Harrison County	7	129	220	356	211	7	7	362.47	15216	696.723	2
19087	IA	Henry County	6	138	292	436	210	6	6	176.371	20139	434.437	7
19089	IA	Howard County	3	68	112	183	114	3	2	82.1981	9574	473.403	7
19091	IA	Humboldt County	2	99	135	236	160	2	3	82.8525	10224	434.411	7
19093	IA	Ida County	3	38	96	137	60	3	3	104.96	7930	431.706	8
19095	IA	Iowa County	3	133	295	431	208	3	3	376.165	15667	586.449	8
19097	IA	Jackson County	5	129	154	288	192	6	6	210.961	20157	636.089	6
19099	IA	Jasper County	10	256	436	702	377	11	11	541.633	36659	729.988	6
19101	IA	Jefferson County	1	129	224	354	179	1	1	131.131	16762	435.341	7
19103	IA	Johnson County	12	886	1731	2629	1295	18	18	970.63	103813	614.479	3
19105	IA	Jones County	4	83	257	344	145	5	5	185.264	20075	575.308	3
19107	IA	Keokuk County	3	44	57	104	67	4	4	150.139	11340	579.188	8
19109	IA	Kossuth County	6	109	120	235	189	6	6	181.786	17630	973.006	7
19111	IA	Lee County	5	278	512	795	420	5	5	291.575	38309	517.392	5
19113	IA	Linn County	11	1546	2741	4298	2255	11	11	1510.33	184891	717.442	3
19115	IA	Louisa County	1	62	166	229	96	1	1	158.155	11945	401.917	8
19117	IA	Lucas County	3	42	96	141	61	3	3	63.1067	9131	430.548	6
19119	IA	Lyon County	1	58	127	186	87	1	1	126.69	12030	587.501	8
19121	IA	Madison County	2	80	125	207	119	3	3	141.413	14105	561.136	2
19123	IA	Mahaska County	3	216	313	532	347	3	3	192.567	21954	570.87	7
19125	IA	Marion County	3	205	391	599	299	3	3	250.989	31529	554.214	6
19127	IA	Marshall County	6	315	590	911	463	6	6	282.637	38782	572.316	4
19129	IA	Mills County	3	83	230	316	121	4	4	258.145	14705	436.534	2
19131	IA	Mitchell County	2	62	89	153	78	2	2	64.9827	11106	468.922	7
19133	IA	Monona County	1	76	162	239	119	1	1	240.824	10089	693.116	6
19135	IA	Monroe County	1	65	91	157	106	1	1	58.5947	8017	433.405	7
19137	IA	Montgomery County	1	85	201	287	122	1	1	100.067	11707	423.882	6
19139	IA	Muscatine County	9	301	384	694	447	12	12	279.882	41195	438.669	4
19141	IA	O'Brien County	1	94	143	238	143	1	1	151.908	14621	573.078	7
19143	IA	Osceola County	5	37	73	115	59	5	5	58.19	6914	398.773	7
19145	IA	Page County	4	88	255	347	129	5	5	128.767	17139	534.824	7
19147	IA	Palo Alto County	0	49	135	184	68	0		85.7501	9917	563.832	7
19149	IA	Plymouth County	5	200	262	467	310	5	5	247.397	24819	863.564	6
19151	IA	Pocahontas County	5	35	57	97	60	9	9	116.176	8774	577.702	9
19153	IA	Polk County	26	4251	6279	10556	6615	28	28	3236.27	364672	569.346	2
19155	IA	Pottawattamie County	12	891	1333	2236	1317	14	14	1351.46	86425	954.262	2
19157	IA	Poweshiek County	4	144	245	393	249	5	5	337.251	18693	585.035	7
19159	IA	Ringgold County	1	48	127	176	68	1		43.8211	5361	537.666	9
19161	IA	Sac County	9	71	104	184	112	9	9	155.672	11761	575.823	9
19163	IA	Scott County	15	1821	2379	4215	2968	15	15	1367.97	159458	457.934	2
19165	IA	Shelby County	2	64	114	180	116	2	2	124.188	12781	590.83	6
19167	IA	Sioux County	3	174	262	439	276	3	4	295.738	31355	767.883	6
19169	IA	Story County	8	573	988	1569	883	11	11	682.742	75373	572.86	3
19171	IA	Tama County	4	122	246	372	188	5	5	201.198	17788	721.298	6
19173	IA	Taylor County	3	35	97	135	59	3	2	57.388	7025	533.953	9
19175	IA	Union County	2	78	161	241	119	2	2	96.14	12611	424.387	6
19177	IA	Van Buren County	1	45	121	167	62	1	1	64.307	7873	484.818	9
19179	IA	Wapello County	6	303	418	727	455	6	6	249.286	35458	431.809	5
19181	IA	Warren County	7	252	496	755	383	10	12	497.145	40614	571.644	2
19183	IA	Washington County	3	149	263	415	222	3	3	210.914	21147	568.713	3
19185	IA	Wayne County	0	38	65	103	49	0		87.0972	6581	525.604	9
19187	IA	Webster County	10	359	729	1098	582	13	13	288.597	38832	715.235	5
19189	IA	Winnebago County	1	49	93	143	79	1	2	68.1565	11971	400.467	7
19191	IA	Winneshiek County	3	169	377	549	251	3	3	203.733	20917	689.609	7
19193	IA	Woodbury County	8	1092	966	2066	1761	8	8	832.508	101437	872.594	3
19195	IA	Worth County	1	40	99	140	67	1		180.319	7657	399.997	9
19197	IA	Wright County	6	84	204	294	121	7	7	112.251	13892	580.723	7
20001	KS	Allen County							3	146.996	14435	503.007	7
20003	KS	Anderson County							2	73.7361	8119	582.918	6
20005	KS	Atchison County							3	136.648	16856	432.338	6
20007	KS	Barber County							11	45.0518	5240	1134.11	9
20009	KS	Barton County							3	231.067	28658	894.004	7
20011	KS	Bourbon County							5	138.327	14980	637.088	6
20013	KS	Brown County							15	112.273	10930	570.674	6
20015	KS	Butler County							5	843.149	62769	1427.85	2
20017	KS	Chase County							6	138.483	2855	775.887	8
20019	KS	Chautauqua County							14	63.2526	4273	641.686	9
20021	KS	Cherokee County							1	171.476	22401	587.115	6
20023	KS	Cheyenne County							2	27.732	3225	1019.88	9
20025	KS	Clark County								34.66	2342	974.684	9
20027	KS	Clay County								69.5861	8971	643.842	7
20029	KS	Cloud County							3	74.7563	10007	715.634	7
20031	KS	Coffey County								154.315	8741	629.746	6
20033	KS	Comanche County							1	16.8239	1954	788.313	9
20035	KS	Cowley County							20	283.951	36948	1126.24	4
20037	KS	Crawford County							8	286.175	36347	592.907	4
20039	KS	Decatur County								49.8987	3370	893.545	9
20041	KS	Dickinson County							3	316.881	19645	847.922	7
20043	KS	Doniphan County							2	111.698	7954	392.177	3
20045	KS	Douglas County							12	700.969	98343	456.87	3
20047	KS	Edwards County							1	48.4655	3275	622.015	9
20049	KS	Elk County							3	29.101	3384	647.293	8
20051	KS	Ellis County							5	335.719	26338	899.971	5
20053	KS	Ellsworth County							4	204.656	6220	715.906	7
20055	KS	Finney County							6	263.692	37409	1301.77	5
20057	KS	Ford County							7	211.2	29587	1098.5	5
20059	KS	Franklin County							7	399.303	25136	573.854	1
20061	KS	Geary County							8	327.961	24911	384.694	5
20063	KS	Gove County								226.474	3028	1071.38	9
20065	KS	Graham County							1	26.7944	3118	898.286	9
20067	KS	Grant County							4	34.5312	7885	574.857	7
20069	KS	Gray County							3	82.5645	5579	868.901	9
20071	KS	Greeley County								14.1805	1648	778.005	9
20073	KS	Greenwood County							2	75.6153	7961	1139.67	6
20075	KS	Hamilton County								35.1522	2374	996.492	9
20077	KS	Harper County							2	36.8873	6305	801.439	8
20079	KS	Harvey County							6	389.509	34261	539.333	2
20081	KS	Haskell County								59.8473	4042	577.365	9
20083	KS	Hodgeman County								19.2011	2235	859.923	9
20085	KS	Jackson County							2	133.019	12177	655.594	3
20087	KS	Jefferson County							12	268.582	18146	536.112	3
20089	KS	Jewell County							5	56.037	3787	909.179	9
20091	KS	Johnson County							29	4378.58	440198	476.776	1
20093	KS	Kearny County							2	61.2358	4137	871.06	9
20095	KS	Kingman County							6	81.4492	8651	863.347	6
20097	KS	Kiowa County							2	49.6267	3351	722.394	9
20099	KS	Labette County							8	216.755	22941	648.822	7
20101	KS	Lane County							3	18.6635	2174	717.218	9
20103	KS	Leavenworth County							14	601.395	71766	463.272	1
20105	KS	Lincoln County							2	63.7837	3338	718.869	9
20107	KS	Linn County							7	137.593	9296	598.67	1
20109	KS	Logan County							2	47.4111	2938	1072.99	9
20111	KS	Lyon County							11	483.317	33794	850.869	5
20113	KS	McPherson County							10	416.143	28815	899.711	6
20115	KS	Marion County							7	162.079	13544	943.107	6
20117	KS	Marshall County							3	117.673	10908	902.531	7
20119	KS	Meade County							1	65.2011	4407	978.416	9
20121	KS	Miami County							9	264.728	27083	576.72	1
20123	KS	Mitchell County								48.061	6957	699.822	7
20125	KS	Montgomery County							15	313.196	36773	645.204	5
20127	KS	Morris County								91.373	6173	697.378	9
20129	KS	Morton County							4	29.999	3489	729.92	9
20131	KS	Nemaha County								150.727	10182	717.987	8
20133	KS	Neosho County							6	154.021	16641	571.748	7
20135	KS	Ness County								30.6029	3564	1074.75	9
20137	KS	Norton County							3	43.4409	5635	877.843	7
20139	KS	Osage County							6	319.034	17199	703.504	3
20141	KS	Osborne County								67.8929	4589	892.389	9
20143	KS	Ottawa County							1	87.1378	5889	721.111	9
20145	KS	Pawnee County							1	46.7867	7207	754.173	7
20147	KS	Phillips County							1	52.45	5958	886.229	7
20149	KS	Pottawatomie County							5	230.636	18942	844.239	6
20151	KS	Pratt County							1	71.1038	9517	734.991	7
20153	KS	Rawlins County							1	25.9214	3016	1069.62	9
20155	KS	Reno County							13	543.139	63702	1254.42	4
20157	KS	Republic County							7	44.4329	5975	716.383	9
20159	KS	Rice County							1	101.737	10233	726.578	7
20161	KS	Riley County							11	501.805	63708	609.55	5
20163	KS	Rooks County							3	83.2817	5626	888.344	9
20165	KS	Rush County							2	49.7857	3365	718.207	9
20167	KS	Russell County							1	174.232	7459	884.68	7
20169	KS	Saline County							8	542.061	51379	719.613	5
20171	KS	Scott County								24.2467	4941	717.525	7
20173	KS	Sedgwick County							56	3840.62	451684	999.376	2
20175	KS	Seward County							2	108.469	20115	639.523	7
20177	KS	Shawnee County							20	1682.66	170773	549.815	3
20179	KS	Sheridan County							6	39.5662	2674	896.356	9
20181	KS	Sherman County							1	190.404	6523	1055.8	7
20183	KS	Smith County							1	67.71	4575	895.431	9
20185	KS	Stafford County							3	73.9615	4996	792.054	9
20187	KS	Stanton County								19.1307	2225	680.004	9
20189	KS	Stevens County								19.4128	5400	727.528	7
20191	KS	Sumner County							9	456.128	27173	1181.81	2
20193	KS	Thomas County							3	256.614	7965	1074.78	7
20195	KS	Trego County							1	176.173	3261	888.293	9
20197	KS	Wabaunsee County							1	175.602	6578	797.381	3
20199	KS	Wallace County							2	15.483	1801	913.994	9
20201	KS	Washington County								95.7858	6473	898.458	9
20203	KS	Wichita County								22.1771	2578	718.517	9
20205	KS	Wilson County							7	76.6809	10339	573.808	7
20207	KS	Woodson County							1	45.6416	3911	500.606	9
20209	KS	Wyandotte County							24	1837.73	151379	151.39	1
21001	KY	Adair County							7	155.889	16462	406.838	7
21003	KY	Allen County							7	151.432	16854	346.122	6
21005	KY	Anderson County							2	197.784	18807	202.67	6
21007	KY	Ballard County							3	105.078	8516	251.161	9
21009	KY	Barren County							5	510.013	37355	490.974	6
21011	KY	Bath County							2	240.209	10741	279.458	8
21013	KY	Bell County							4	279.223	29028	360.768	7
21015	KY	Boone County							5	851.581	83356	246.26	1
21017	KY	Bourbon County							4	199.392	19363	291.43	2
21019	KY	Boyd County							4	544.674	48843	160.168	2
21021	KY	Boyle County							10	278.054	27358	181.897	7
21023	KY	Bracken County							2	89.9836	8478	203.218	1
21025	KY	Breathitt County							8	167.382	15771	495.193	7
21027	KY	Breckinridge County							7	218.677	17728	572.41	8
21029	KY	Bullitt County							10	849.671	60955	299.076	1
21031	KY	Butler County							7	127.549	12019	428.079	8
21033	KY	Caldwell County							3	162.636	13366	346.98	6
21035	KY	Calloway County							3	340.552	33293	386.254	7
21037	KY	Campbell County							12	1107.9	87203	151.554	1
21039	KY	Carlisle County							3	66.4524	5386	192.486	9
21041	KY	Carroll County							1	209.023	9775	130.088	6
21043	KY	Carter County							14	658.335	27106	410.599	6
21045	KY	Casey County							3	158.265	14908	445.612	9
21047	KY	Christian County							12	942.226	71941	721.315	3
21049	KY	Clark County							8	504.82	32457	254.31	2
21051	KY	Clay County							12	280.954	22780	471.01	7
21053	KY	Clinton County							2	116.708	9464	197.455	9
21055	KY	Crittenden County							4	52.8669	9556	362.141	6
21057	KY	Cumberland County							6	56.0946	6876	305.822	9
21059	KY	Daviess County							10	859.972	91179	462.389	3
21061	KY	Edmonson County							2	124.663	11595	302.623	3
21063	KY	Elliott County							1	53.2688	6533	233.961	9
21065	KY	Estill County							4	83.2308	15506	253.932	6
21067	KY	Fayette County							19	2752.9	243785	284.515	2
21069	KY	Fleming County							1	128.841	13605	350.844	7
21071	KY	Floyd County							15	493.262	43266	394.294	7
21073	KY	Franklin County							12	601.347	46588	210.46	4
21075	KY	Fulton County							6	31.4299	7451	208.95	7
21077	KY	Gallatin County							1	249.43	7437	98.8064	1
21079	KY	Garrard County							7	128.315	14333	231.207	6
21081	KY	Grant County							8	375.694	20805	259.93	1
21083	KY	Graves County							14	409.614	36254	555.592	7
21085	KY	Grayson County							7	229.487	23828	503.676	6
21087	KY	Green County							1	86.38	10595	288.661	8
21089	KY	Greenup County							5	334.193	36732	346.106	2
21091	KY	Hancock County							2	95.2776	8977	188.8	3
21093	KY	Hardin County							21	1279.98	91567	627.977	3
21095	KY	Harlan County							8	359.433	34273	467.195	7
21097	KY	Harrison County							3	141.95	17666	309.679	6
21099	KY	Hart County							10	345.567	16864	415.93	8
21101	KY	Henderson County							7	562.709	44410	440.124	2
21103	KY	Henry County							5	275.778	15023	289.318	1
21105	KY	Hickman County							2	63.3909	5146	244.445	9
21107	KY	Hopkins County							10	501.607	46155	550.558	4
21109	KY	Jackson County							5	106.365	13040	346.331	9
21111	KY	Jefferson County							67	7772.17	672900	385.088	1
21113	KY	Jessamine County							5	348.517	37300	173.133	2
21115	KY	Johnson County								244.592	23999	261.544	7
21117	KY	Kenton County							12	1835.07	147221	161.966	1
21119	KY	Knott County							6	190.283	17931	352.193	9
21121	KY	Knox County							7	324.513	31976	387.665	7
21123	KY	Larue County							3	131.037	13150	263.196	3
21125	KY	Laurel County							13	848.223	52015	435.67	7
21127	KY	Lawrence County							4	167.72	15800	418.775	6
21129	KY	Lee County							2	65.1987	7994	209.859	9
21131	KY	Leslie County							3	167.201	13558	404.03	9
21133	KY	Letcher County							5	250.905	26069	339.044	9
21135	KY	Lewis County							8	142.991	13471	484.488	8
21137	KY	Lincoln County							3	245.796	22540	336.259	7
21139	KY	Livingston County							1	129.285	9481	316.082	9
21141	KY	Logan County							7	288.116	26276	555.684	6
21143	KY	Lyon County							3	339.808	8060	215.703	8
21145	KY	McCracken County							12	746.877	64407	251.025	5
21147	KY	McCreary County							5	206.597	16754	427.698	9
21149	KY	McLean County							2	80.7049	9897	254.295	3
21151	KY	Madison County							22	934.965	67690	440.683	4
21153	KY	Magoffin County							1	173.135	14036	309.437	9
21155	KY	Marion County							6	165.381	17120	346.393	6
21157	KY	Marshall County							6	429.355	30250	304.885	7
21159	KY	Martin County							2	146.807	11901	230.7	8
21161	KY	Mason County							9	175.06	16825	241.109	6
21163	KY	Meade County							10	327.198	29195	308.505	1
21165	KY	Menifee County							1	47.8916	5865	203.898	9
21167	KY	Mercer County							5	220.941	20809	250.916	6
21169	KY	Metcalfe County							3	118.402	9596	290.895	9
21171	KY	Monroe County							3	56.3048	11157	330.808	9
21173	KY	Montgomery County							7	305.267	21636	198.591	6
21175	KY	Morgan County							8	168.485	13660	381.262	7
21177	KY	Muhlenberg County							13	281.314	31968	474.719	6
21179	KY	Nelson County							14	426.416	36971	422.627	1
21181	KY	Nicholas County							1	75.6545	7126	196.609	8
21183	KY	Ohio County							3	179.525	22128	593.789	6
21185	KY	Oldham County							9	508.738	45821	189.188	1
21187	KY	Owen County							3	84.926	10418	352.14	8
21189	KY	Owsley County							1	43.8013	5375	198.091	9
21191	KY	Pendleton County							2	172.17	13959	280.535	1
21193	KY	Perry County							7	311.778	30805	342.15	7
21195	KY	Pike County							23	741.98	71526	787.689	7
21197	KY	Powell County							3	128.038	13264	180.135	6
21199	KY	Pulaski County							16	661.06	57110	661.604	5
21201	KY	Robertson County								24.0139	2265	100.069	8
21203	KY	Rockcastle County							4	423.976	15974	317.526	7
21205	KY	Rowan County							7	408.37	22168	280.822	7
21207	KY	Russell County							5	171.816	16182	253.531	9
21209	KY	Scott County							7	636.949	32249	284.722	2
21211	KY	Shelby County							15	502.909	30552	384.19	1
21213	KY	Simpson County							7	263.003	16587	236.189	6
21215	KY	Spencer County							4	85.1164	10441	185.902	1
21217	KY	Taylor County							3	214.865	22942	269.829	7
21219	KY	Todd County							3	139.204	11289	376.353	8
21221	KY	Trigg County							2	276.333	12593	443.12	3
21223	KY	Trimble County							3	72.9176	7926	148.849	1
21225	KY	Union County							4	160.419	16499	345.098	6
21227	KY	Warren County							14	1280	87683	545.211	3
21229	KY	Washington County							2	101.377	11047	300.593	8
21231	KY	Wayne County							3	154.724	19190	459.398	7
21233	KY	Webster County							2	120.48	13460	334.752	2
21235	KY	Whitley County							11	672.48	36130	440.154	7
21237	KY	Wolfe County							6	92.6067	7507	222.783	9
21239	KY	Woodford County							10	306.798	22773	190.678	2
22001	LA	Acadia Parish							16	670.827	57947	655.283	4
22003	LA	Allen Parish							8	244.221	24218	764.498	6
22005	LA	Ascension Parish							18	805.08	74049	291.529	2
22007	LA	Assumption Parish							9	266.453	23242	338.682	6
22009	LA	Avoyelles Parish							16	484.42	40710	832.437	6
22011	LA	Beauregard Parish							16	327.113	32265	1160.09	6
22013	LA	Bienville Parish							9	281.644	15739	810.639	6
22015	LA	Bossier Parish							16	837.037	93374	839.251	2
22017	LA	Caddo Parish							60	2469.7	241502	881.993	2
22019	LA	Calcasieu Parish							42	1893.9	180607	1071.12	3
22021	LA	Caldwell Parish							5	138.677	10469	529.417	8
22023	LA	Cameron Parish							4	88.9099	8969	1312.96	3
22025	LA	Catahoula Parish							6	88.968	10905	703.649	9
22027	LA	Claiborne Parish							5	133.999	16826	754.653	7
22029	LA	Concordia Parish							7	155.072	20572	695.91	7
22031	LA	De Soto Parish							12	606.789	25146	877.2	2
22033	LA	East Baton Rouge Parish							57	3283.95	393294	455.428	2
22035	LA	East Carroll Parish							2	68.0247	8719	421.44	7
22037	LA	East Feliciana Parish							1	223.596	21119	453.402	2
22039	LA	Evangeline Parish							7	294.335	34329	664.272	6
22041	LA	Franklin Parish							10	235.76	21993	623.612	7
22043	LA	Grant Parish							4	254.408	19211	645.114	3
22045	LA	Iberia Parish							16	570.858	73425	575.13	4
22047	LA	Iberville Parish							5	416.652	31357	618.642	2
22049	LA	Jackson Parish							5	121.412	15449	569.753	6
22051	LA	Jefferson Parish							26	2560.04	447790	306.517	1
22053	LA	Jefferson Davis Parish							11	458.292	31423	652.311	6
22055	LA	Lafayette Parish							37	1887.42	187403	269.835	3
22057	LA	Lafourche Parish							30	753.231	89463	1084.68	3
22059	LA	La Salle Parish							3	118.568	13705	623.826	6
22061	LA	Lincoln Parish							7	486.295	41129	471.377	4
22063	LA	Livingston Parish							20	1005.36	91182	648.022	2
22065	LA	Madison Parish							5	377.344	12987	624.086	7
22067	LA	Morehouse Parish							8	280.086	31242	794.248	6
22069	LA	Natchitoches Parish							8	788.442	37198	1255.45	6
22071	LA	Orleans Parish							83	2780.57	460913	180.556	1
22073	LA	Ouachita Parish							26	1443.95	146672	610.529	3
22075	LA	Plaquemines Parish							11	97.1405	26094	844.56	1
22077	LA	Pointe Coupee Parish							7	248.613	23440	557.343	2
22079	LA	Rapides Parish							25	1586.84	126775	1322.54	3
22081	LA	Red River Parish							1	94.1283	9489	389.288	6
22083	LA	Richland Parish							7	422.254	21082	558.455	6
22085	LA	Sabine Parish							8	221.699	23812	865.265	6
22087	LA	St. Bernard Parish							10	239.057	65406	465.04	1
22089	LA	St. Charles Parish							6	343.582	48640	283.641	1
22091	LA	St. Helena Parish							7	95.2971	9607	408.362	2
22093	LA	St. James Parish							10	197.635	21197	246.132	6
22095	LA	St. John the Baptist Parish							21	390.184	42494	218.895	1
22097	LA	St. Landry Parish							23	1116.92	84243	928.65	4
22099	LA	St. Martin Parish							9	663.858	47645	739.853	3
22101	LA	St. Mary Parish							9	351.87	56795	612.795	4
22103	LA	St. Tammany Parish							26	2191.43	192945	854.152	1
22105	LA	Tangipahoa Parish							28	1425.16	98285	790.245	4
22107	LA	Tensas Parish							2	70.5404	6539	602.483	9
22109	LA	Terrebonne Parish							29	807.053	105128	1254.93	3
22111	LA	Union Parish							9	246.658	22165	877.602	3
22113	LA	Vermilion Parish							9	411.667	52258	1173.78	4
22115	LA	Vernon Parish							10	400.604	51567	1328.41	4
22117	LA	Washington Parish							14	392.102	43162	669.569	6
22119	LA	Webster Parish							14	516.804	42797	595.223	6
22121	LA	West Baton Rouge Parish							9	301.579	20421	191.203	2
22123	LA	West Carroll Parish							3	120.728	12175	359.398	9
22125	LA	West Feliciana Parish							6	183.216	13833	406.005	2
22127	LA	Winn Parish							5	166.914	17498	950.486	6
23001	ME	Androscoggin County							24	875.511	101337	470.274	3
23003	ME	Aroostook County							10	758.14	75836	6671.54	7
23005	ME	Cumberland County							19	2639.44	256437	835.509	2
23007	ME	Franklin County							8	340.965	28797	1697.81	6
23009	ME	Hancock County							11	666.028	49670	1587.7	6
23011	ME	Kennebec County							15	1400.05	115224	867.582	4
23013	ME	Knox County							5	364.269	38193	365.672	7
23015	ME	Lincoln County							7	345.678	31947	455.995	8
23017	ME	Oxford County							12	544.917	54288	2078	6
23019	ME	Penobscot County							18	1618.8	144432	3395.73	3
23021	ME	Piscataquis County							2	184.588	18077	3966.22	8
23023	ME	Sagadahoc County							3	440.965	36267	253.899	2
23025	ME	Somerset County							13	655.546	52630	3926.5	6
23027	ME	Waldo County							5	404.87	36965	729.729	6
23029	ME	Washington County							6	426.898	35352	2568.48	7
23031	ME	York County							23	2092.89	177588	990.916	2
24001	MD	Allegany County							11	1199.7	71162	425.419	3
24003	MD	Anne Arundel County							55	4039.18	480483	415.938	1
24005	MD	Baltimore County							83	6437.48	723914	598.587	1
24009	MD	Calvert County							14	774.666	73748	215.174	1
24011	MD	Caroline County							12	305.532	29708	320.141	6
24013	MD	Carroll County							18	1479.09	152468	449.125	1
24015	MD	Cecil County							32	1220.25	84238	348.134	1
24017	MD	Charles County							24	929.488	120946	461.001	1
24019	MD	Dorchester County							6	269.748	29709	557.54	6
24021	MD	Frederick County							32	2352.25	190869	662.875	1
24023	MD	Garrett County							7	853.456	29389	647.956	6
24025	MD	Harford County							24	2028.19	217908	440.349	1
24027	MD	Howard County							25	2019.42	243112	252.039	1
24029	MD	Kent County								171.729	19089	279.434	6
24031	MD	Montgomery County							50	6958.6	852174	495.516	1
24033	MD	Prince George's County							79	6698.24	781781	485.432	1
24035	MD	Queen Anne's County							5	468.923	40688	372.205	1
24037	MD	St. Mary's County							18	868.966	88758	361.251	4
24039	MD	Somerset County							2	245.816	24236	327.215	3
24041	MD	Talbot County							12	320.564	33550	269.138	6
24043	MD	Washington County							16	2039.38	127791	458.136	3
24045	MD	Wicomico County							6	767.051	79560	377.171	3
24047	MD	Worcester County							13	388.167	43672	473.237	4
24510	MD	Baltimore city							45	6290.49	632681	80.8044	1
25001	MA	Barnstable County							18	2227.53	212519	395.514	3
25003	MA	Berkshire County							19	1763.21	132218	931.317	3
25005	MA	Bristol County							51	4221.97	520258	555.996	1
25007	MA	Dukes County							2	79.5701	14048	103.779	7
25009	MA	Essex County							52	5763.36	704407	500.667	1
25011	MA	Franklin County							8	1268.74	70806	702.028	2
25013	MA	Hampden County							37	3781.02	438279	618.404	2
25015	MA	Hampshire County							10	1606.36	150892	529.029	2
25017	MA	Middlesex County							62	11155.5	1426606	823.458	1
25019	MA	Nantucket County							1	39.0568	8206	47.8098	7
25021	MA	Norfolk County							32	6229.78	643580	399.583	1
25023	MA	Plymouth County							30	3505.49	473026	660.851	1
25025	MA	Suffolk County							30	2705.83	641695	58.516	1
25027	MA	Worcester County							62	7163.49	738629	1513.06	2
26001	MI	Alcona County							4	116.535	11147	674.434	9
26003	MI	Alger County							3	74.5432	10083	917.831	9
26005	MI	Allegan County							24	1255.23	103406	827.465	4
26007	MI	Alpena County							1	271.973	30615	574.15	7
26009	MI	Antrim County							4	229.318	21953	476.937	9
26011	MI	Arenac County							1	361.418	16547	366.842	8
26013	MI	Baraga County							2	86.7059	8672	903.997	9
26015	MI	Barry County							11	372.021	54648	556.135	2
26017	MI	Bay County							25	1188.88	109514	444.246	3
26019	MI	Benzie County							3	159.312	15257	321.313	9
26021	MI	Berrien County							31	1994.15	159709	571	3
26023	MI	Branch County							16	618.697	43825	507.412	6
26025	MI	Calhoun County							27	1646.29	141380	708.716	3
26027	MI	Cass County							20	352.712	50129	492.179	2
26029	MI	Charlevoix County							4	185.767	25034	416.84	7
26031	MI	Cheboygan County							5	610.295	24153	715.599	7
26033	MI	Chippewa County							3	543.024	37904	1561.06	5
26035	MI	Clare County							7	277.29	29955	566.796	7
26037	MI	Clinton County							6	811.365	64054	571.458	2
26039	MI	Crawford County							3	392.319	14265	558.123	7
26041	MI	Delta County							7	326.768	38848	1170.03	5
26043	MI	Dickinson County							2	210.531	26944	766.337	5
26045	MI	Eaton County							18	1101.17	101612	576.41	2
26047	MI	Emmet County							4	289.705	28995	467.82	7
26049	MI	Genesee County							62	4687.31	437349	639.64	2
26051	MI	Gladwin County							5	163.444	25697	506.803	6
26053	MI	Gogebic County							4	150.809	17043	1101.86	7
26055	MI	Grand Traverse County							16	712.423	75352	465.071	5
26057	MI	Gratiot County							6	370.609	40027	570.128	6
26059	MI	Hillsdale County							14	437.905	47042	598.843	6
26061	MI	Houghton County							9	319.614	35448	1011.72	5
26063	MI	Huron County							3	333.819	35283	836.517	7
26065	MI	Ingham County							31	2686.55	285123	559.188	2
26067	MI	Ionia County							9	677.666	67126	573.214	2
26069	MI	Iosco County							6	225.801	25928	549.112	7
26071	MI	Iron County							2	133.931	12817	1166.36	7
26073	MI	Isabella County							10	543.957	59122	574.273	5
26075	MI	Jackson County							21	1796.71	157271	706.597	3
26077	MI	Kalamazoo County							33	2351.23	229867	561.864	2
26079	MI	Kalkaska County							3	165.225	15808	561.016	7
26081	MI	Kent County							67	5227.18	550388	856.175	2
26083	MI	Keweenaw County								15.4277	2142	540.975	9
26085	MI	Lake County							3	110.908	10627	567.435	8
26087	MI	Lapeer County							26	1097.82	89391	654.204	1
26089	MI	Leelanau County							1	138.66	19370	348.469	9
26091	MI	Lenawee County							17	880.155	99780	750.502	4
26093	MI	Livingston County							27	1742.45	151496	568.398	1
26095	MI	Luce County							4	70.6172	6754	903.083	7
26097	MI	Mackinac County							7	374.253	11103	1021.58	7
26099	MI	Macomb County							52	6500.27	792082	480.438	1
26101	MI	Manistee County							3	215.696	23665	543.608	7
26103	MI	Marquette County							11	504.897	62758	1821.05	5
26105	MI	Mason County							5	252.927	27966	495.167	7
26107	MI	Mecosta County							8	367.175	40704	555.693	6
26109	MI	Menominee County							5	216.489	24449	1043.52	7
26111	MI	Midland County							15	736.77	81994	521.194	4
26113	MI	Missaukee County							4	101.376	14151	566.746	9
26115	MI	Monroe County							26	1582.72	144913	551.1	3
26117	MI	Montcalm County							19	584.822	61406	708.04	6
26119	MI	Montmorency County							1	104.598	10014	547.627	9
26121	MI	Muskegon County							21	1457.5	168037	509.117	3
26123	MI	Newaygo County							10	301.308	46356	842.368	2
26125	MI	Oakland County							90	10076.1	1179978	872.511	1
26127	MI	Oceana County							4	260.144	24900	540.458	8
26129	MI	Ogemaw County							3	341.288	21201	564.304	9
26131	MI	Ontonagon County							2	79.997	7668	1311.53	9
26133	MI	Osceola County							11	232.091	22220	565.982	7
26135	MI	Oscoda County							1	93.0312	8899	565.002	9
26137	MI	Otsego County							5	445.96	22719	514.542	7
26139	MI	Ottawa County							34	2298.88	230261	565.654	3
26141	MI	Presque Isle County							1	114.386	14596	660.073	7
26143	MI	Roscommon County							4	435.489	23562	521.4	7
26145	MI	Saginaw County							40	1972.34	209245	808.932	3
26147	MI	St. Clair County							28	1953.88	161755	724.371	1
26149	MI	St. Joseph County							15	564.821	61448	503.722	4
26151	MI	Sanilac County							10	453.905	43451	963.798	6
26153	MI	Schoolcraft County							1	55.8822	8788	1178.11	7
26155	MI	Shiawassee County							12	698.776	72346	538.734	4
26157	MI	Tuscola County							18	539.491	58195	812.429	6
26159	MI	Van Buren County							20	899.689	75917	610.861	2
26161	MI	Washtenaw County							39	3270.64	306073	709.939	2
26163	MI	Wayne County							233	18778.6	2106495	614.152	1
26165	MI	Wexford County							14	261.138	29560	565.493	7
27001	MN	Aitkin County							5	211.842	14293	1819.3	8
27003	MN	Anoka County							22	2589.57	298948	423.606	1
27005	MN	Becker County							10	361.948	29757	1310.42	6
27007	MN	Beltrami County							12	437.874	39210	2505.27	7
27009	MN	Benton County							7	340.487	34832	408.276	3
27011	MN	Big Stone County							2	82.5537	5571	496.947	9
27013	MN	Blue Earth County							6	465.53	53874	752.358	5
27015	MN	Brown County							5	211.142	26903	610.864	7
27017	MN	Carlton County							8	534.105	31492	860.33	2
27019	MN	Carver County							11	552.956	67023	357.042	1
27021	MN	Cass County							6	400.962	27042	2017.6	9
27023	MN	Chippewa County							2	124.463	13028	582.802	7
27025	MN	Chisago County							11	814.009	42302	417.631	1
27027	MN	Clay County							10	560.457	51717	1045.24	3
27029	MN	Clearwater County							5	120.733	8146	994.71	8
27031	MN	Cook County							2	52.934	4772	1450.6	9
27033	MN	Cottonwood County							7	120.297	11908	639.994	7
27035	MN	Crow Wing County							12	567.933	52608	996.568	5
27037	MN	Dakota County							22	2928.04	349131	569.582	1
27039	MN	Dodge County							4	203.504	17396	439.504	3
27041	MN	Douglas County							9	467.258	31274	634.322	7
27043	MN	Faribault County							3	378.899	16247	713.63	7
27045	MN	Fillmore County							6	306.671	20688	861.252	8
27047	MN	Freeborn County							6	547.69	31503	707.641	7
27049	MN	Goodhue County							12	422.714	43367	758.27	4
27051	MN	Grant County							2	149.525	6077	546.405	9
27053	MN	Hennepin County							41	10810.5	1064419	556.617	1
27055	MN	Houston County							1	206.848	19489	558.406	3
27057	MN	Hubbard County							5	206.798	17031	922.455	7
27059	MN	Isanti County							5	264.391	30887	439.068	1
27061	MN	Itasca County							6	558.675	44154	2665.06	6
27063	MN	Jackson County							4	307.795	11378	701.692	7
27065	MN	Kanabec County							5	168.072	14427	524.931	6
27067	MN	Kandiyohi County							11	398.715	40826	796.058	4
27069	MN	Kittson County							2	76.7214	5175	1097.08	9
27071	MN	Koochiching County							1	135.719	14895	3102.36	7
27073	MN	Lac qui Parle County							3	115.802	7813	764.865	9
27075	MN	Lake County							1	106.761	10765	2099.16	6
27077	MN	Lake of the Woods County							3	68.5214	4621	1296.7	9
27079	MN	Le Sueur County							4	307.014	25464	448.499	6
27081	MN	Lincoln County							4	95.2465	6424	537.03	9
27083	MN	Lyon County							7	228.031	24256	714.174	7
27085	MN	McLeod County							12	317.155	34552	491.908	6
27087	MN	Mahnomen County							4	75.4706	5091	556.14	8
27089	MN	Marshall County							1	149.623	10094	1772.24	8
27091	MN	Martin County							2	397.666	21792	709.345	7
27093	MN	Meeker County							7	252.134	21763	608.541	6
27095	MN	Mille Lacs County							7	256.979	21350	574.466	6
27097	MN	Morrison County							4	369.132	30522	1124.5	6
27099	MN	Mower County							5	473.022	37152	711.498	4
27101	MN	Murray County							2	141.08	9519	704.43	9
27103	MN	Nicollet County							2	217.102	29272	452.293	5
27105	MN	Nobles County							4	351.421	19113	715.386	7
27107	MN	Norman County							1	73.3794	7517	876.27	8
27109	MN	Olmsted County							22	1245.6	119077	653.01	3
27111	MN	Otter Tail County							14	873.864	55583	1979.71	6
27113	MN	Pennington County							1	109.679	13557	616.542	6
27115	MN	Pine County							9	632.681	24616	1411.04	6
27117	MN	Pipestone County							4	87.3655	9993	465.886	6
27119	MN	Polk County							6	283.878	30787	1970.37	3
27121	MN	Pope County							2	124.825	10886	670.136	8
27123	MN	Ramsey County							31	5061.83	486254	155.777	1
27125	MN	Red Lake County							5	62.2931	4202	432.431	8
27127	MN	Redwood County							6	178.695	16421	879.726	7
27129	MN	Renville County							1	214.291	16808	982.92	9
27131	MN	Rice County							11	484.688	54988	497.569	4
27133	MN	Rock County							2	209.072	9619	482.61	6
27135	MN	Roseau County							2	238.492	16085	1662.51	7
27137	MN	St. Louis County							23	1883.87	193433	6225.16	2
27139	MN	Scott County							13	628.994	82994	356.676	1
27141	MN	Sherburne County							8	630.673	63356	436.301	1
27143	MN	Sibley County							1	218.978	14774	588.649	8
27145	MN	Stearns County							18	1670.28	130081	1344.52	3
27147	MN	Steele County							7	397.13	32061	429.548	5
27149	MN	Stevens County							2	88.9931	9973	562.064	7
27151	MN	Swift County							2	120.283	11344	743.53	7
27153	MN	Todd County							11	320.949	24240	942.019	6
27155	MN	Traverse County								61.7891	4168	574.088	9
27157	MN	Wabasha County							8	213.664	21140	525.008	3
27159	MN	Wadena County							2	132.788	13238	535.017	7
27161	MN	Waseca County							3	178.852	18560	423.251	7
27163	MN	Washington County							11	1769.15	202606	391.704	1
27165	MN	Watonwan County							1	110.803	11548	434.514	7
27167	MN	Wilkin County							1	127.057	7287	751.431	6
27169	MN	Winona County							16	635.316	47785	626.303	4
27171	MN	Wright County							16	1193.21	87864	660.754	1
27173	MN	Yellow Medicine County							6	135.864	11310	757.955	9
28001	MS	Adams County							7	315	33657	460.261	5
28003	MS	Alcorn County							8	393.5	33080	399.893	7
28005	MS	Amite County							5	216.4	13906	729.6	8
28007	MS	Attala County							5	259	18338	735.126	6
28009	MS	Benton County							10	179.6	8091	406.789	8
28011	MS	Bolivar County							13	400.8	39826	876.284	5
28013	MS	Calhoun County							10	179.8	14891	586.538	7
28015	MS	Carroll County							8	268.3	9967	627.733	9
28017	MS	Chickasaw County							5	254.7	18121	501.558	7
28019	MS	Choctaw County							6	140.7	9366	419.1	9
28021	MS	Claiborne County							9	115.2	11596	486.767	6
28023	MS	Clarke County							8	255.9	18445	691.267	9
28025	MS	Clay County							7	210.4	21657	408.56	7
28027	MS	Coahoma County							9	317.1	31094	554.152	5
28029	MS	Copiah County							9	450.401	28892	776.602	2
28031	MS	Covington County							7	365.4	17889	413.79	8
28033	MS	DeSoto County							32	1118.9	102131	477.862	1
28035	MS	Forrest County							25	846.901	74927	466.577	3
28037	MS	Franklin County							3	166.6	8160	564.595	9
28039	MS	George County							10	213.7	20185	478.292	3
28041	MS	Greene County							2	168.7	12630	712.819	8
28043	MS	Grenada County							5	305.6	22450	421.792	7
28045	MS	Hancock County							17	592.9	41518	476.877	3
28047	MS	Harrison County							37	1905.5	178567	580.981	3
28049	MS	Hinds County							54	2730.8	245737	869.185	2
28051	MS	Holmes County							10	356.7	21562	756	6
28053	MS	Humphreys County							4	131.501	11214	418.089	7
28055	MS	Issaquena County							1	42.5	1635	413.063	9
28057	MS	Itawamba County							13	324.801	21085	532.307	7
28059	MS	Jackson County							31	1468.7	133120	726.901	3
28061	MS	Jasper County							4	302.5	18110	676.005	9
28063	MS	Jefferson County							4	124.6	8385	519.387	7
28065	MS	Jefferson Davis County							2	176.6	13770	408.407	8
28067	MS	Jones County							13	828.999	63054	693.815	4
28069	MS	Kemper County							6	172.801	10487	766.133	9
28071	MS	Lafayette County							9	361.4	34914	631.114	6
28073	MS	Lamar County							6	471.6	38127	497.067	3
28075	MS	Lauderdale County							34	1071.6	75978	703.51	5
28077	MS	Lawrence County							3	151.9	13066	430.628	8
28079	MS	Leake County							10	282.8	19602	582.707	6
28081	MS	Lee County							27	992.201	75211	449.589	5
28083	MS	Leflore County							7	345.701	36816	591.927	5
28085	MS	Lincoln County							14	478.1	32105	585.705	6
28087	MS	Lowndes County							16	614.301	60527	502.296	5
28089	MS	Madison County							18	797	74562	717.111	2
28091	MS	Marion County							12	283.001	26538	542.343	6
28093	MS	Marshall County							22	599.8	32323	706.326	1
28095	MS	Monroe County							13	474.3	38230	764.174	7
28097	MS	Montgomery County							8	231.201	12394	406.845	7
28099	MS	Neshoba County							8	364.7	27639	569.998	7
28101	MS	Newton County							6	401.1	21741	578.033	7
28103	MS	Noxubee County							12	167.6	12497	694.788	7
28105	MS	Oktibbeha County							8	362.4	39765	457.71	5
28107	MS	Panola County							21	533.6	33913	684.197	6
28109	MS	Pearl River County							13	595.8	47969	811.33	6
28111	MS	Perry County							2	217.8	12039	647.177	3
28113	MS	Pike County							17	491.3	37910	408.889	7
28115	MS	Pontotoc County							3	324.8	25685	497.352	7
28117	MS	Prentiss County							6	313.999	24497	414.927	7
28119	MS	Quitman County							4	134.6	9780	404.838	6
28121	MS	Rankin County							34	1374.6	112348	774.516	2
28123	MS	Scott County							18	429.801	24911	609.083	6
28125	MS	Sharkey County							5	106.7	6543	427.711	9
28127	MS	Simpson County							15	405.1	25375	588.731	2
28129	MS	Smith County							7	218.8	15431	635.887	8
28131	MS	Stone County							4	200.801	13488	445.366	3
28133	MS	Sunflower County							10	361.9	33257	693.79	5
28135	MS	Tallahatchie County							4	157.7	14587	643.922	7
28137	MS	Tate County							7	304.6	24417	404.479	1
28139	MS	Tippah County							2	259.7	21069	457.905	7
28141	MS	Tishomingo County							12	270.101	18742	424.124	8
28143	MS	Tunica County							8	280.5	7935	454.809	1
28145	MS	Union County							8	398.7	24121	415.431	7
28147	MS	Walthall County							2	183.9	14211	403.821	9
28149	MS	Warren County							15	615.2	49148	586.611	4
28151	MS	Washington County							19	584.8	64265	723.986	5
28153	MS	Wayne County							12	280.4	20637	810.324	7
28155	MS	Webster County							4	162.8	10633	422.493	9
28157	MS	Wilkinson County							2	136.8	9042	676.705	8
28159	MS	Winston County							12	237.6	19253	606.969	7
28161	MS	Yalobusha County							11	251.5	12627	467.12	7
28163	MS	Yazoo County							18	368.9	25208	919.482	6
29001	MO	Adair County							1	185.318	24200	567.005	7
29003	MO	Andrew County							9	329.799	15585	435.183	3
29005	MO	Atchison County							2	306.732	7021	544.718	9
29007	MO	Audrain County							5	233.81	23449	693.096	6
29009	MO	Barry County							11	414.423	33189	779.063	6
29011	MO	Barton County								116.521	12133	594.25	6
29013	MO	Bates County							6	171.662	16061	848.466	1
29015	MO	Benton County							7	238.51	17345	705.512	9
29017	MO	Bollinger County							4	162.62	11829	620.741	9
29019	MO	Boone County							24	1404.98	130179	685.43	3
29021	MO	Buchanan County							14	860.823	81635	409.73	3
29023	MO	Butler County							9	417.626	40379	697.539	7
29025	MO	Caldwell County							2	123.187	8926	429.341	1
29027	MO	Callaway County							9	684.143	37904	838.836	3
29029	MO	Camden County							14	403.913	34596	655.143	7
29031	MO	Cape Girardeau County							3	781.296	67200	578.619	5
29033	MO	Carroll County							1	79.2666	10108	694.722	6
29035	MO	Carter County							5	86.5424	6292	507.583	9
29037	MO	Cass County							11	803.271	83099	698.991	1
29039	MO	Cedar County								136.531	13395	475.933	6
29041	MO	Chariton County							3	117.641	8557	755.871	9
29043	MO	Christian County							8	547.949	51353	563.161	2
29045	MO	Clark County							4	101.245	7367	507.311	9
29047	MO	Clay County							33	1980.82	180111	396.348	1
29049	MO	Clinton County							5	329.285	19522	418.762	1
29051	MO	Cole County							18	710.673	69512	391.444	3
29053	MO	Cooper County							4	342.584	16153	565.028	6
29055	MO	Crawford County							7	459.488	22427	742.518	6
29057	MO	Dade County							1	67.1268	7939	490.341	8
29059	MO	Dallas County							11	214.127	15570	541.543	2
29061	MO	Daviess County							4	288.14	8051	566.967	8
29063	MO	DeKalb County							4	166.281	11288	424.199	3
29065	MO	Dent County							6	92.7866	14257	753.539	7
29067	MO	Douglas County							5	86.7897	12421	814.532	6
29069	MO	Dunklin County							9	324.545	32526	545.62	7
29071	MO	Franklin County							38	1318.24	93128	922.811	1
29073	MO	Gasconade County							4	172.809	14975	520.668	6
29075	MO	Gentry County								94.4241	6872	491.522	8
29077	MO	Greene County							39	2458.01	227002	674.973	2
29079	MO	Grundy County							1	101.847	10134	435.817	7
29081	MO	Harrison County							7	348.776	8413	725.129	7
29083	MO	Henry County							1	196.505	21288	702.484	6
29085	MO	Hickory County							1	119.973	8728	398.628	8
29087	MO	Holt County							2	326.658	5562	461.866	8
29089	MO	Howard County							4	64.4378	9661	465.735	3
29091	MO	Howell County							12	416.487	36070	927.741	7
29093	MO	Iron County							4	92.4075	10936	551.339	6
29095	MO	Jackson County							91	7657.4	654484	604.844	1
29097	MO	Jasper County							14	1317.84	100267	639.733	3
29099	MO	Jefferson County							47	2422.63	198116	656.796	1
29101	MO	Johnson County							12	520.835	48053	830.44	4
29103	MO	Knox County							4	59.2982	4312	505.707	9
29105	MO	Laclede County							7	606.605	31419	765.854	6
29107	MO	Lafayette County							16	577.588	32810	629.312	1
29109	MO	Lawrence County							14	587.239	33494	613.076	6
29111	MO	Lewis County							3	94.329	10230	505.007	9
29113	MO	Lincoln County							12	462.786	37733	630.49	1
29115	MO	Linn County							1	106.149	13867	620.352	7
29117	MO	Livingston County							9	126.501	14024	534.523	6
29119	MO	McDonald County							8	277.22	20158	539.512	2
29121	MO	Macon County							3	154.901	15450	803.769	7
29123	MO	Madison County							6	113.538	11650	496.731	7
29125	MO	Maries County							5	115.803	8423	527.728	8
29127	MO	Marion County							3	243.823	27719	438.075	5
29129	MO	Mercer County								54.4275	3956	454.176	9
29131	MO	Miller County							14	255.645	22624	592.255	6
29133	MO	Mississippi County							1	260.379	13339	413.157	7
29135	MO	Moniteau County							5	140.846	13313	416.519	3
29137	MO	Monroe County							5	100.332	9137	645.982	9
29139	MO	Montgomery County							8	283.581	12110	537.462	8
29141	MO	Morgan County							5	260.011	18908	597.412	8
29143	MO	New Madrid County							6	522.697	19933	678.011	7
29145	MO	Newton County							11	635.987	49714	626.417	3
29147	MO	Nodaway County							4	203.959	20531	876.62	6
29149	MO	Oregon County							5	141.481	10295	791.403	9
29151	MO	Osage County							12	172.181	12524	606.107	3
29153	MO	Ozark County							3	84.2573	9970	742.148	9
29155	MO	Pemiscot County							14	574.79	21150	493.078	7
29157	MO	Perry County							6	290.924	17431	474.668	7
29159	MO	Pettis County							19	348.586	37110	684.824	4
29161	MO	Phelps County							12	638.322	38954	672.852	5
29163	MO	Pike County							6	145.242	16411	672.823	6
29165	MO	Platte County							10	974.718	71688	420.332	1
29167	MO	Polk County							15	291.171	25740	637.204	2
29169	MO	Pulaski County							13	526.152	38230	547.02	5
29171	MO	Putnam County							3	41.2102	4872	517.897	9
29173	MO	Ralls County							1	124.209	9169	470.998	9
29175	MO	Randolph County							4	247.953	23863	482.319	6
29177	MO	Ray County							6	276.98	23759	569.465	1
29179	MO	Reynolds County							3	91.1797	6627	811.198	9
29181	MO	Ripley County							5	119.82	14174	629.466	9
29183	MO	St. Charles County							22	2709.14	280448	560.421	1
29185	MO	St. Clair County							9	127.579	9276	676.656	8
29186	MO	Ste. Genevieve County							4	399.584	17462	502.389	6
29187	MO	St. Francois County							11	589.467	55790	449.464	4
29189	MO	St. Louis County							74	11596	996181	507.805	1
29195	MO	Saline County							9	439.724	22782	755.55	6
29197	MO	Schuyler County							1	60.6758	4415	307.868	9
29199	MO	Scotland County							2	41.6587	4921	438.465	9
29201	MO	Scott County							8	508.454	40564	421.01	5
29203	MO	Shannon County							1	114.085	8298	1003.83	9
29205	MO	Shelby County							1	91.6468	6660	500.935	9
29207	MO	Stoddard County							10	358.002	29633	827.123	7
29209	MO	Stone County							1	232.534	27506	463.224	8
29211	MO	Sullivan County							3	94.4241	6864	650.949	9
29213	MO	Taney County							15	389.124	35490	632.356	6
29215	MO	Texas County							8	309.017	22470	1178.54	9
29217	MO	Vernon County							8	188.14	19488	833.953	7
29219	MO	Warren County							6	333.708	25435	431.314	1
29221	MO	Washington County							8	286.686	23354	759.594	1
29223	MO	Wayne County							5	179.361	13046	761.034	9
29225	MO	Webster County							13	472.509	29977	593.316	2
29227	MO	Worth County								19.4096	2295	266.52	9
29229	MO	Wright County							8	218.305	19934	682.126	6
29510	MO	St. Louis city							44	4243.62	333960	61.9237	1
30001	MT	Beaverhead County	2			224	88	2	2	204.795	8790	5542.31	7
30003	MT	Big Horn County	13			179	140	13	13	286.453	12573	4994.81	6
30005	MT	Blaine County	3			106	45	4	4	97.4112	7074	4226.18	9
30007	MT	Broadwater County	0			141	84	0		68.2643	4167	1191.35	9
30009	MT	Carbon County	5			243	108	13	13	131.422	9543	2047.99	3
30011	MT	Carter County	1			11	8	1	1	20.0134	1454	3339.57	9
30013	MT	Cascade County	11			2361	802	11	11	631.373	78282	2697.9	3
30015	MT	Chouteau County	2			74	44	2	2	69.7482	5066	3973.24	8
30017	MT	Custer County	0			307	108	0		166.14	11837	3783.13	7
30019	MT	Daniels County	0			27	5	0		15.7116	1963	1426.09	9
30021	MT	Dawson County	0			228	80	0		146.883	8670	2373.14	7
30023	MT	Deer Lodge County	3			140	77	3	3	79.087	9721	736.978	7
30025	MT	Fallon County	0			27	18	0		23.1078	2885	1620.33	9
30027	MT	Fergus County	2			293	94	2	2	110.249	12180	4339.17	7
30029	MT	Flathead County	11			1796	1048	12	12	730.17	72773	5098.34	5
30031	MT	Gallatin County	8			1801	658	9	9	665.274	63881	2605.84	5
30033	MT	Garfield County	0			18	17	0		19.5582	1420	4668.06	9
30035	MT	Glacier County	8			229	196	8	8	129.437	12603	2994.72	7
30037	MT	Golden Valley County	0			28	9	0		14.4214	1049	1175.3	8
30039	MT	Granite County	3			102	38	3	3	76.0357	2662	1727.44	8
30041	MT	Hill County	4			417	134	4	4	124.701	17050	2896.36	7
30043	MT	Jefferson County	2			329	180	2	2	323.119	10367	1656.64	9
30045	MT	Judith Basin County	0			81	44	0		31.4658	2284	1869.85	8
30047	MT	Lake County	10			534	381	13	13	305.416	25885	1493.77	6
30049	MT	Lewis and Clark County	11			1717	12	808	12	479.275	54075	3460.96	5
30051	MT	Liberty County	1			20	9	1	1	31.0099	2253	1429.76	9
30053	MT	Lincoln County	1			356	216	1	1	222.88	18819	3612.67	7
30055	MT	McCone County	3			143	95	3		26.4932	1924	2642.53	9
30057	MT	Madison County	0			33	12	0	3	69.8995	6927	3586.54	9
30059	MT	Meagher County	1			44	34	1	1	14.2185	1777	2391.82	9
30061	MT	Mineral County	3			276	109	3	3	177.192	3867	1219.82	8
30063	MT	Missoula County	16			2290	1125	16	16	774.69	89344	2597.97	3
30065	MT	Musselshell County	0			125	62	0		62.6844	4552	1867.15	8
30067	MT	Park County	5			467	226	5	5	215.327	15982	2802.41	7
30069	MT	Petroleum County	0			24	13	0		5.8031	506	1653.9	9
30071	MT	Phillips County	3			64	41	5	5	64.6121	4692	5139.57	9
30073	MT	Pondera County	1			94	41	1	1	89.011	6244	1624.7	7
30075	MT	Powder River County	0			40	19	0		24.4552	1777	3297.18	9
30077	MT	Powell County	1			198	92	1	1	116.426	6945	2325.94	7
30079	MT	Prairie County	0			36	9	0		60.911	1360	1736.55	9
30081	MT	Ravalli County	4			827	311	4	4	443.199	35811	2394.21	6
30083	MT	Richland County	2			200	77	2	2	92.3256	10053	2084.09	7
30085	MT	Roosevelt County	5			149	65	6	6	113.835	10912	2355.6	7
30087	MT	Rosebud County	4			129	62	4	4	177.793	9869	5012.37	9
30089	MT	Sanders County	2			210	134	2	2	81.9151	10233	2762.17	8
30091	MT	Sheridan County	0			73	24	0		56.4526	4100	1676.58	9
30093	MT	Silver Bow County	9			801	296	9	9	269.133	33954	718.308	5
30095	MT	Stillwater County	6			238	124	11	11	139.33	8328	1795.09	8
30097	MT	Sweet Grass County	1			129	66	1	1	99.4567	3584	1855.08	9
30099	MT	Teton County	2			134	55	2	2	92.2512	6432	2272.61	8
30101	MT	Toole County	1			118	53	1	1	114.829	4638	1910.95	7
30103	MT	Treasure County	1			53	16	1	1	54.8684	859	978.864	8
30105	MT	Valley County	2			134	49	2	2	67.0056	8132	4921	7
30107	MT	Wheatland County	1			68	33	1	1	31.3568	2276	1423.09	9
30109	MT	Wibaux County	1			32	14	1	1	38.0925	1117	889.313	9
30111	MT	Yellowstone County	19			1850	1092	22	22	1058.02	127258	2635.15	3
31001	NE	Adams County	4	277	688	969	414	4	4	208.619	29289	563.408	5
31003	NE	Antelope County	1	50	101	152	62	1	1	123.026	7243	857.06	9
31005	NE	Arthur County	1	2	7	10	3	1	1	4.2274	412	715.369	9
31007	NE	Banner County	0	11	23	34	15	0		10.2754	831	746.217	9
31009	NE	Blaine County	1	1	8	10	1	2	2	9.7641	575	710.743	9
31011	NE	Boone County	0	33	75	108	51	0		65.24	6355	686.689	9
31013	NE	Box Butte County	3	113	208	324	164	3	3	94.6664	12674	1075.29	7
31015	NE	Boyd County	1	7	27	35	8	1	1	42.7895	2520	540.049	9
31017	NE	Brown County	1	18	54	73	28	1	1	59.4311	3499	1221.28	9
31019	NE	Buffalo County	5	469	886	1360	732	7	7	580.165	40249	967.994	5
31021	NE	Burt County	1	44	96	141	73	1	1	134.274	7907	492.767	8
31023	NE	Butler County	0	72	99	171	110	0		104.951	8607	583.588	6
31025	NE	Cass County	7	208	416	631	345	7	7	397.865	24841	559.184	2
31027	NE	Cedar County	2	67	102	171	112	2	2	163.219	9612	740.226	9
31029	NE	Chase County	1	25	35	61	40	1	1	72.2169	4253	894.495	9
31031	NE	Cherry County	4	43	62	109	64	4	4	61.112	6326	5960.52	7
31033	NE	Cheyenne County	7	101	157	265	152	9	9	335.077	9428	1196.34	7
31035	NE	Clay County	1	40	112	153	64	1	1	72.813	7094	573.033	9
31037	NE	Colfax County	1	56	133	190	103	1	1	104.147	10691	413.143	7
31039	NE	Cuming County	2	65	165	232	108	3	3	117.13	9981	572.001	7
31041	NE	Custer County	0	60	187	247	101	0		141.336	11825	2575.71	7
31043	NE	Dakota County	1	165	246	412	278	2	2	187.953	19140	263.796	3
31045	NE	Dawes County	3	58	214	275	101	3	3	79.9959	8831	1396.24	7
31047	NE	Dawson County	9	193	426	628	325	9	9	430.65	23277	1012.92	7
31049	NE	Deuel County	1	29	28	58	50	1	1	224.193	1988	439.894	9
31051	NE	Dixon County	2	27	60	89	38	2	2	107.986	6360	476.386	3
31053	NE	Dodge County	3	371	701	1075	591	3	3	288.766	35201	534.394	4
31055	NE	Douglas County	30	6891	7692	14613	10800	33	33	3550.5	446277	330.978	2
31057	NE	Dundy County	2	20	25	47	25	2	2	36.9956	2179	919.86	9
31059	NE	Fillmore County	1	50	65	116	73	1	1	117.403	6912	576.46	9
31061	NE	Franklin County	1	18	77	96	37	1	1	37.7461	3677	575.922	9
31063	NE	Frontier County	3	33	57	93	48	3	3	53.6352	3157	974.55	9
31065	NE	Furnas County	1	40	95	136	57	1	1	91.8863	5411	718.086	9
31067	NE	Gage County	3	223	602	828	311	3	3	228.214	22710	855.288	6
31069	NE	Garden County	0	12	23	35	16	0		35.1965	2073	1704.4	9
31071	NE	Garfield County	0	11	14	25	19	0		20.6949	2015	570.028	9
31073	NE	Gosper County	1	12	39	52	23	1	1	23.1554	2256	458.175	9
31075	NE	Grant County	0	4	8	12	8	0		12.1335	714	776.225	9
31077	NE	Greeley County	0	17	37	54	21	0		47.7298	2812	569.854	9
31079	NE	Hall County	9	596	1176	1781	933	13	13	498.899	51764	546.397	5
31081	NE	Hamilton County	5	93	210	308	146	6	6	206.136	9566	543.676	7
31083	NE	Harlan County	2	31	77	110	50	3	3	62.3121	3671	552.783	9
31085	NE	Hayes County	0	8	17	25	15	0		13.1827	1066	713.114	9
31087	NE	Hitchcock County	2	23	36	61	39	2	2	41.6105	3366	710.029	9
31089	NE	Holt County	1	91	144	236	121	1	1	142.501	11884	2412.66	7
31091	NE	Hooker County	0	8	11	19	12	0		8.1889	689	721.166	9
31093	NE	Howard County	2	47	86	135	81	2	2	111.068	6540	569.469	9
31095	NE	Jefferson County	1	50	192	243	89	1	1	73.727	8288	573.015	7
31097	NE	Johnson County	2	27	123	152	38	2	2	77.2117	4548	376.131	8
31099	NE	Kearney County	1	47	85	133	65	1	1	70.0543	6861	516.029	7
31101	NE	Keith County	4	122	196	322	206	5	5	339.551	8877	1061.26	7
31103	NE	Keya Paha County	0	5	13	18	6	0		9.7819	952	773.287	9
31105	NE	Kimball County	1	46	70	117	79	1	1	247.076	4027	951.723	6
31107	NE	Knox County	3	43	100	146	67	4	4	92.8744	9048	1108.12	9
31109	NE	Lancaster County	21	3679	4551	8251	5653	25	25	1942.19	237657	838.881	2
31111	NE	Lincoln County	12	431	777	1220	714	14	14	634.196	33866	2563.98	5
31113	NE	Logan County	0	3	11	14	6	0		15.186	895	570.681	9
31115	NE	Loup County	0	7	12	19	7	0		6.7162	654	569.709	9
31117	NE	McPherson County	4	350	696	1050	575	4		5.6098	547	858.982	9
31119	NE	Madison County	0	4	4	8	11	0	4	292.97	34184	572.566	5
31121	NE	Merrick County	0	77	142	219	115	0		89.8508	8052	484.877	7
31123	NE	Morrill County	2	54	93	149	83	2	2	89.8885	5294	1423.75	9
31125	NE	Nance County	1	21	64	86	41	1	1	41.6449	4057	441.317	9
31127	NE	Nemaha County	1	73	166	240	110	1	1	75.6787	7618	409.305	7
31129	NE	Nuckolls County	1	28	81	110	41	1	1	52.5577	5121	575.302	9
31131	NE	Otoe County	5	128	251	384	214	7	7	164.444	14803	615.687	6
31133	NE	Pawnee County	3	22	75	100	29	3	3	31.6939	3087	431.572	9
31135	NE	Perkins County	0	25	34	59	40	0		32.883	3205	883.176	9
31137	NE	Phelps County	2	77	143	222	125	2	2	93.5609	9831	539.967	7
31139	NE	Pierce County	3	47	87	137	78	4	4	134.93	7945	573.927	9
31141	NE	Platte County	5	305	678	988	451	7	7	262.079	30378	678.069	5
31143	NE	Polk County	3	41	69	113	75	4	4	93.6857	5518	438.836	9
31145	NE	Red Willow County	1	78	218	297	122	1	1	91.7346	11304	716.654	7
31147	NE	Richardson County	2	56	192	250	86	3	3	85.3635	9330	553.259	7
31149	NE	Rock County	0	9	30	39	13	0		28.7148	1690	1008.46	9
31151	NE	Saline County	2	73	264	339	105	2	2	86.5752	13111	575.337	6
31153	NE	Sarpy County	10	938	1276	2224	1526	10	10	1101.98	122495	240.519	2
31155	NE	Saunders County	4	152	252	408	251	4	4	263.773	19260	753.895	2
31157	NE	Scotts Bluff County	5	317	533	855	501	8	8	335.257	36078	739.274	5
31159	NE	Seward County	3	160	361	524	268	3	3	280.082	16435	574.753	2
31161	NE	Sheridan County	5	61	96	162	113	6	6	109.042	6423	2441.04	9
31163	NE	Sherman County	0	24	51	75	34	0		58.8885	3470	565.842	9
31165	NE	Sioux County	1	20	19	40	28	1	1	24.1775	1424	2066.59	9
31167	NE	Stanton County	2	42	50	94	74	4	4	103.588	6100	429.827	9
31169	NE	Thayer County	2	55	122	179	79	3	3	104.788	6170	574.554	9
31171	NE	Thomas County	1	9	14	24	14	1	1	10.0002	809	712.863	9
31173	NE	Thurston County	4	44	60	108	76	4	4	119.773	7054	393.812	8
31175	NE	Valley County	0	29	75	104	49	0		46.4494	4527	568.108	9
31177	NE	Washington County	2	149	264	415	238	4	4	220.375	18837	390.487	2
31179	NE	Wayne County	3	69	139	211	101	3	3	63.7702	9201	443.435	6
31181	NE	Webster County	1	35	86	122	50	1	1	40.3721	3933	574.89	9
31183	NE	Wheeler County	1	12	11	24	17	1	1	15.6975	924	575.166	9
31185	NE	York County	6	155	297	458	225	6	6	289.529	14392	575.657	7
32001	NV	Churchill County	9	146	376	531	213	10	10	448.047	23405	4929.08	6
32003	NV	Clark County	174	14798	29145	44117	23024	195	195	9775.84	1217155	7910.34	1
32005	NV	Douglas County	6	199	502	707	300	6	6	575.643	37602	709.85	4
32007	NV	Elko County	24	269	903	1196	488	28	26	1033.31	45465	17179	5
32009	NV	Esmeralda County	3	25	44	72	45	6	6	26.1734	1121	3588.5	9
32011	NV	Eureka County	4	33	76	113	54	5	5	139.667	1854	4175.68	9
32013	NV	Humboldt County	8	101	348	457	145	8	8	455.286	17876	9647.91	7
32015	NV	Lander County	3	43	97	143	62	4	4	168.643	6709	5493.63	7
32017	NV	Lincoln County	6	47	94	147	87	8	8	98.6686	4226	10633.6	8
32019	NV	Lyon County	4	111	294	409	174	4	4	628.188	31459	1993.69	6
32021	NV	Mineral County	4	29	87	120	48	5	5	45.729	5176	3756.4	7
32023	NV	Nye County	14	132	372	518	201	20	20	300.696	29709	18146.7	6
32027	NV	Pershing County	5	42	88	135	86	5	5	356.835	4803	6036.56	8
32029	NV	Storey County	0	20	69	89	27	0		37.6019	2988	263.453	2
32031	NV	Washoe County	38	2510	6374	8922	3581	41	41	2897.75	319816	6342.27	2
32033	NV	White Pine County	4	58	209	271	84	4	4	115.741	9843	8875.98	7
32510	NV	Carson City	3	299	826	1128	401	3	3	287.072	50046	143.354	3
33001	NH	Belknap County							9	583.467	53680	401.293	4
33003	NH	Carroll County							10	335.892	40184	933.799	8
33005	NH	Cheshire County							9	555.286	72401	707.396	4
33007	NH	Coos County							3	255.225	32725	1800.39	7
33009	NH	Grafton County							9	1284.87	78570	1713.33	5
33011	NH	Hillsborough County							31	3265.46	367233	876.361	2
33013	NH	Merrimack County							29	1624.28	129931	934.43	4
33015	NH	Rockingham County							29	2629.82	275488	694.965	1
33017	NH	Strafford County							6	957.481	110667	368.761	1
33019	NH	Sullivan County							5	402.665	40255	537.376	7
34001	NJ	Atlantic County				9558			35	2062.62	239626	561.074	2
34003	NJ	Bergen County				34705			52	6374.13	857052	234.171	1
34005	NJ	Burlington County				11334			46	3567.88	424510	804.573	1
34007	NJ	Camden County				16393			43	4199.36	503093	222.298	1
34009	NJ	Cape May County				3000			12	686.925	98009	255.186	3
34011	NJ	Cumberland County				4795			35	1094.02	140112	489.297	3
34013	NJ	Essex County				34567			73	6019.39	747355	126.267	1
34015	NJ	Gloucester County				6195			35	2195.65	250492	324.718	1
34017	NJ	Hudson County				25389			35	4279.28	552819	46.6876	1
34019	NJ	Hunterdon County				3561			15	1694.41	124553	429.942	1
34021	NJ	Mercer County				13506			23	3555.65	333861	225.929	2
34023	NJ	Middlesex County				31327			55	5461.74	717949	309.72	1
34025	NJ	Monmouth County				19694			60	4821.55	611444	471.938	1
34027	NJ	Morris County				15907			25	3671.56	463545	468.992	1
34029	NJ	Ocean County				14891			46	3369.99	497533	636.276	1
34031	NJ	Passaic County				19367			25	3382.31	485064	185.292	1
34033	NJ	Salem County				1868			24	680.543	64534	337.88	1
34035	NJ	Somerset County				10962			24	2044.1	288090	304.687	1
34037	NJ	Sussex County				3533			16	1182.28	144700	521.255	1
34039	NJ	Union County				21247			32	3820.52	498759	103.289	1
34041	NJ	Warren County				2959			15	1376.14	100312	357.867	2
35001	NM	Bernalillo County	60	6306	10754	17120	9654	69	69	4602.12	523472	1166.03	2
35003	NM	Catron County	3	29	78	110	45	3	3	58.8855	2862	6927.81	9
35005	NM	Chaves County	7	424	794	1225	746	16	16	485.868	62394	6070.86	5
35006	NM	Cibola County	11	167	270	448	275	12	12	495.723	26894	4539.21	6
35007	NM	Colfax County	5	101	223	339	150	5	5	429.011	13666	3756.79	7
35009	NM	Curry County	7	424	794	866	746	16	7	310.458	43570	1405.95	5
35011	NM	De Baca County	3	29	36	68	46	4	4	48.494	2359	2324.87	9
35013	NM	Dona Ana County	17	1278	1775	3070	2020	21	21	2408.25	170361	3807.18	3
35015	NM	Eddy County	11	389	816	1216	632	13	13	450.088	53122	4182.02	5
35017	NM	Grant County	10	189	351	550	297	12	12	501.69	31335	3965.88	7
35019	NM	Guadalupe County	4	69	137	210	123	4	4	435.365	4023	3030.37	7
35021	NM	Harding County	1	3	3	7	5	1	1	12.5788	854	2125.34	9
35023	NM	Hidalgo County	4	74	85	163	126	4	4	240.952	6027	3445.63	7
35025	NM	Lea County	12	336	628	976	546	16	16	460.391	55067	4392.96	5
35027	NM	Lincoln County	6	198	441	645	311	7	7	219.903	16778	4830.97	7
35028	NM	Los Alamos County	1	83	168	252	108	1	1	67.0699	18281	109.345	6
35029	NM	Luna County	17	143	277	437	284	18	18	553.876	24360	2965.09	6
35031	NM	McKinley County	36	487	1058	1581	874	39	39	1258.95	66923	5448.72	4
35033	NM	Mora County	2	44	71	117	81	2	2	251.702	4945	1931.1	8
35035	NM	Otero County	8	343	635	986	525	9	9	490.803	54185	6626.5	4
35037	NM	Quay County	6	77	181	254	129	10	10	415.918	9872	2874.93	7
35039	NM	Rio Arriba County	26	361	536	923	630	30	30	631.902	38180	5857.63	6
35041	NM	Roosevelt County	4	100	227	331	160	4	4	173.68	17416	2448.5	7
35043	NM	Sandoval County	23	413	645	1081	676	25	25	1032.3	90253	3709.34	2
35045	NM	San Juan County	25	929	1509	2463	1482	27	27	1149.57	109899	5514.02	3
35047	NM	San Miguel County	8	235	389	632	360	8	8	595.437	28488	4717.04	6
35049	NM	Santa Fe County	19	1394	2030	3443	2177	33	33	1735.64	124228	1909.19	3
35051	NM	Sierra County	9	75	171	255	116	10	10	348.299	11008	4180.23	6
35053	NM	Socorro County	12	117	224	353	175	14	14	595.131	16500	6646.4	6
35055	NM	Taos County	4	246	390	640	353	5	5	466.377	27116	2203.17	7
35057	NM	Torrance County	9	79	133	221	143	10	10	570.905	16408	3344.81	2
35059	NM	Union County	1	38	54	93	58	2	2	80.3012	3903	3830	9
35061	NM	Valencia County	16	338	526	880	559	19	19	784.747	65095	1067.63	2
36001	NY	Albany County	14	2979	4646	7639	4199	15	16	3007.52	292006	523.445	2
36003	NY	Allegany County	13	334	548	895	498	14	14	651.47	50553	1030.22	7
36005	NY	Bronx County	59	11960	5931	17950	19796	60	60	6121.07	1194099	42.0271	1
36007	NY	Broome County	21	1686	2691	4398	2428	24	23	2428.81	195246	706.823	2
36009	NY	Cattaraugus County	14	609	664	1287	890	18	18	1051.56	84477	1309.85	4
36011	NY	Cayuga County	10	618	844	1472	887	12	11	784.864	81703	693.185	4
36013	NY	Chautauqua County	10	1059	1789	2858	1541	12	12	1570.99	137431	1062.05	4
36015	NY	Chemung County	11	701	840	1552	990	11	10	815.255	91738	408.17	3
36017	NY	Chenango County	8	420	721	1149	605	9	7	591.644	50704	894.358	6
36019	NY	Clinton County	15	577	969	1561	933	19	19	914.985	79722	1038.95	5
36021	NY	Columbia County	8	528	876	1412	800	10	11	724.235	63002	635.734	6
36023	NY	Cortland County	8	412	880	1300	589	8	8	574.693	48006	499.652	4
36025	NY	Delaware County	13	394	719	1126	571	13	14	487.077	46362	1446.37	6
36027	NY	Dutchess County	29	2818	3730	6577	4382	31	33	2784.98	268237	801.595	2
36029	NY	Erie County	75	7865	7112	15052	11692	83	84	8207.15	925957	1044.21	1
36031	NY	Essex County	4	348	540	892	511	4	3	741.322	37507	1796.8	6
36033	NY	Franklin County	7	386	627	1020	537	7	7	418.511	48511	1631.49	5
36035	NY	Fulton County	3	462	689	1154	658	4	3	353.836	52851	496.166	4
36037	NY	Genesee County	13	579	1190	1782	915	14	14	753.149	60469	494.109	4
36039	NY	Greene County	7	384	720	1111	566	10	11	613.957	48348	647.746	6
36041	NY	Hamilton County	1	60	126	187	94	1	1	45.1349	5190	1720.39	8
36043	NY	Herkimer County	5	436	635	1076	642	5	5	644.152	63354	1411.25	2
36045	NY	Jefferson County	11	820	1165	1996	1187	11	12	1308.72	109920	1272.2	4
36047	NY	Kings County	114	26511	9157	35782	44876	114	119	11702.9	2268297	70.606	1
36049	NY	Lewis County	6	182	338	526	242	6	6	252.197	27289	1275.42	6
36051	NY	Livingston County	4	446	1077	1527	661	4	7	837.833	65851	632.128	1
36053	NY	Madison County	10	492	888	1390	749	11	11	691.074	71127	655.856	2
36055	NY	Monroe County	49	6067	10873	16989	8736	50	50	6549.18	712419	659.294	1
36057	NY	Montgomery County	1	396	730	1127	586	1	3	663.842	50369	404.815	4
36059	NY	Nassau County	123	16681	18408	35212	25332	129	132	6534.16	1305057	286.692	1
36061	NY	New York County	66	14679	8211	22956	21657	67	68	7566.56	1551844	22.9637	1
36063	NY	Niagara County	18	1891	1925	3834	2808	20	20	1860.91	216164	522.948	1
36065	NY	Oneida County	31	2175	3253	5459	3168	34	36	2445.25	229714	1212.7	2
36067	NY	Onondaga County	34	4509	7244	11787	6498	36	39	4322.7	456215	780.293	2
36069	NY	Ontario County	15	794	2368	3177	1237	15	12	1118.53	99791	644.382	1
36071	NY	Orange County	43	3511	4650	8204	5235	43	41	3534.38	334199	816.338	2
36073	NY	Orleans County	7	246	513	766	366	7	6	393.892	45022	391.396	1
36075	NY	Oswego County	24	993	1825	2842	1455	26	25	1311.51	123875	953.302	2
36077	NY	Otsego County	9	567	982	1558	801	10	10	807.914	60619	1002.8	6
36079	NY	Putnam County	15	954	1172	2141	1396	16	16	745.219	94844	231.283	1
36081	NY	Queens County	118	23875	10704	34697	39136	125	124	9923.82	2000642	109.235	1
36083	NY	Rensselaer County	11	1191	1583	2785	1766	13	15	1616.65	151445	653.964	2
36085	NY	Richmond County	15	3808	1958	5781	5822	15	16	1929.17	413280	58.4787	1
36087	NY	Rockland County	22	2930	3444	6396	4375	26	26	1342.84	284022	174.219	1
36089	NY	St. Lawrence County	23	693	2025	2741	1052	29	28	907.973	112853	2685.6	5
36091	NY	Saratoga County	23	1422	1607	3052	2033	29	26	1947.45	199733	811.844	2
36093	NY	Schenectady County	7	1165	1746	2918	1600	7	7	1622.17	143871	206.103	2
36095	NY	Schoharie County	6	223	405	634	364	8	9	378.823	32050	622.022	2
36097	NY	Schuyler County	4	137	299	440	210	4	6	203.418	19229	328.707	6
36099	NY	Seneca County	2	283	638	923	424	2	2	363.849	31925	324.913	6
36101	NY	Steuben County	16	741	1079	1836	1073	21	20	1356.76	97699	1392.64	4
36103	NY	Suffolk County	153	14621	16633	31407	22015	170	169	7093.75	1383847	912.198	1
36105	NY	Sullivan County	12	720	1045	1777	1084	13	10	660.618	69331	969.715	4
36107	NY	Tioga County	3	351	664	1018	540	3	3	487.178	52216	518.692	2
36109	NY	Tompkins County	5	715	1462	2182	991	7	7	748.234	97656	476.051	3
36111	NY	Ulster County	20	1722	2422	4164	2586	25	27	1798.57	167293	1126.48	3
36113	NY	Warren County	8	687	1331	2026	1007	8	9	877.92	61441	869.292	3
36115	NY	Washington County	8	471	763	1242	713	8	11	553.198	60141	835.438	3
36117	NY	Wayne County	9	640	1023	1672	951	12	12	894.829	95521	604.214	1
36119	NY	Westchester County	51	8409	8992	17452	12078	55	57	4274.21	905572	432.824	1
36121	NY	Wyoming County	8	326	581	915	486	10	10	358.041	44189	592.914	6
36123	NY	Yates County	8	109	83	200	159	8	8	219.131	24556	338.236	6
37001	NC	Alamance County				249	139		24	1499.22	121100	429.989	3
37003	NC	Alexander County							7	217.142	31984	260.185	2
37005	NC	Alleghany County							2	68.9028	9850	234.65	9
37007	NC	Anson County							14	207.106	24238	531.567	1
37009	NC	Ashe County							9	169.839	24284	426.129	9
37011	NC	Avery County							3	152.945	15844	247.004	8
37013	NC	Beaufort County							9	418.684	45150	827.967	6
37015	NC	Bertie County							8	196.667	20392	699.193	9
37017	NC	Bladen County							12	198.653	30919	874.936	6
37019	NC	Brunswick County							15	683.001	71214	854.794	2
37021	NC	Buncombe County							33	2932.06	196274	655.99	2
37023	NC	Burke County							16	1060.59	83101	506.725	2
37025	NC	Cabarrus County							23	1403.83	124844	364.39	1
37027	NC	Caldwell County							14	700.548	76429	471.599	2
37029	NC	Camden County								66.0967	6866	240.677	8
37031	NC	Carteret County							12	561.813	60031	519.841	4
37033	NC	Caswell County							10	216.33	22436	424.666	8
37035	NC	Catawba County							22	1956.26	134307	399.968	2
37037	NC	Chatham County							15	407.725	46503	682.853	2
37039	NC	Cherokee County							7	202.746	23173	455.188	9
37041	NC	Chowan County							1	120.091	14309	172.637	7
37043	NC	Clay County							2	61.2537	8745	214.702	9
37045	NC	Cleveland County							16	1067.87	94024	464.629	4
37047	NC	Columbus County							30	504.003	52946	936.804	6
37049	NC	Craven County							15	783.933	89391	708.427	5
37051	NC	Cumberland County							43	3086.17	283650	652.716	2
37053	NC	Currituck County							5	128.065	18305	261.696	1
37055	NC	Dare County							8	246.905	29640	383.577	5
37057	NC	Davidson County							38	1668.93	142852	552.149	4
37059	NC	Davie County							5	455.441	32693	265.185	2
37061	NC	Duplin County							22	728.08	43379	817.728	6
37063	NC	Durham County							27	2439.04	204097	290.317	2
37065	NC	Edgecombe County							7	533.602	54659	505.026	3
37067	NC	Forsyth County							35	3651.39	288810	409.595	2
37069	NC	Franklin County							13	412.351	45612	492.023	2
37071	NC	Gaston County							22	2253.05	185169	356.215	1
37073	NC	Gates County							7	98.221	10180	340.607	8
37075	NC	Graham County							1	53.3444	7609	292.067	9
37077	NC	Granville County							10	707.463	44546	531.117	6
37079	NC	Greene County							2	178.77	18537	265.399	3
37081	NC	Guilford County							49	4946.88	391380	649.423	2
37083	NC	Halifax County							18	820.01	55832	725.357	4
37085	NC	Harnett County							28	924.907	84501	595.013	4
37087	NC	Haywood County							13	968.054	52002	553.664	2
37089	NC	Henderson County							12	953.804	82264	374.002	2
37091	NC	Hertford County							11	163.202	21937	353.258	7
37093	NC	Hoke County							4	269.357	31324	391.215	2
37095	NC	Hyde County								40.7282	5828	612.795	9
37097	NC	Iredell County							23	1817.15	117519	575.568	4
37099	NC	Jackson County							4	259.793	30260	490.714	6
37101	NC	Johnston County							49	1760.17	110850	791.855	2
37103	NC	Jones County							3	72.8502	9320	471.878	8
37105	NC	Lee County							13	477.498	49452	257.261	4
37107	NC	Lenoir County							9	532.292	58842	399.852	4
37109	NC	Lincoln County							11	558.286	58895	298.791	4
37111	NC	McDowell County							3	681.355	40565	441.68	6
37113	NC	Macon County							4	254.275	28906	516.471	7
37115	NC	Madison County							4	182.394	18906	449.42	2
37117	NC	Martin County							10	244.952	26133	461.175	6
37119	NC	Mecklenburg County							71	7618.86	648400	526.275	1
37121	NC	Mitchell County								142.362	14763	221.427	9
37123	NC	Montgomery County							9	262.132	24323	491.599	6
37125	NC	Moore County							18	703.609	72885	697.735	4
37127	NC	Nash County							17	1157.7	92369	540.269	3
37129	NC	New Hanover County							17	1547.83	150895	198.934	2
37131	NC	Northampton County							8	300.107	21234	536.479	9
37133	NC	Onslow County							29	1031.24	142480	766.818	3
37135	NC	Orange County							17	1423.38	111533	399.838	2
37137	NC	Pamlico County							5	63.5861	12314	336.942	9
37139	NC	Pasquotank County							4	288.347	35629	226.876	7
37141	NC	Pender County							16	713.857	40293	870.673	2
37143	NC	Perquimans County							1	88.2207	11294	247.168	9
37145	NC	Person County							8	316.445	33856	392.311	2
37147	NC	Pitt County							22	1087.34	127960	651.577	3
37149	NC	Polk County							7	298.397	16893	237.854	8
37151	NC	Randolph County							19	1405.64	123410	787.361	2
37153	NC	Richmond County							7	441.556	45718	473.979	4
37155	NC	Robeson County							49	1521.78	116597	948.839	4
37157	NC	Rockingham County							17	871.652	90287	566.435	2
37159	NC	Rowan County							40	1554.84	126585	511.314	4
37161	NC	Rutherford County							10	573.248	61507	564.117	4
37163	NC	Sampson County							18	765.174	52812	945.447	6
37165	NC	Scotland County							12	346.449	35882	319.144	6
37167	NC	Stanly County							12	525.515	56547	395.058	6
37169	NC	Stokes County							7	389.569	43894	451.838	2
37171	NC	Surry County							28	1083.43	67940	536.519	4
37173	NC	Swain County							5	119.01	12341	528.101	8
37175	NC	Transylvania County							3	210.557	28853	378.39	6
37177	NC	Tyrrell County							2	30.7412	3940	389.912	9
37179	NC	Union County							30	1049.31	115144	637.367	1
37181	NC	Vance County							9	583.721	42496	253.516	4
37183	NC	Wake County							71	6763.31	586940	831.924	2
37185	NC	Warren County							5	281.82	18848	428.702	8
37187	NC	Washington County							4	83.3111	13443	348.464	7
37189	NC	Watauga County							6	381.808	41419	312.509	6
37191	NC	Wayne County							25	1119.41	111711	552.569	3
37193	NC	Wilkes County							8	581.56	63640	757.186	6
37195	NC	Wilson County							24	950.517	68801	371.089	4
37197	NC	Yadkin County							10	493.149	35245	335.554	2
37199	NC	Yancey County							3	162.731	16860	312.454	8
38001	ND	Adams County								41.3353	2644	987.914	9
38003	ND	Barnes County							2	187.806	11864	1491.65	6
38005	ND	Benson County							7	105.987	6781	1380.6	9
38007	ND	Billings County								61.4438	1066	1151.41	9
38009	ND	Bottineau County							4	78.7414	7241	1668.59	9
38011	ND	Bowman County							2	51.0808	3269	1162.05	9
38013	ND	Burke County							1	34.2142	2189	1103.53	9
38015	ND	Burleigh County							7	544.726	67371	1633.09	3
38017	ND	Cass County							8	970.726	118405	1765.23	3
38019	ND	Cavalier County								75.3587	4821	1488.46	9
[truncated: 1,144 more rows]

## Sheet: Sources
Variable	Data Source				Website
Fatal crashes	State websites				See next worksheet
Non-fatal injury crashes	State websites				See next worksheet
Property damage-only (PDO) crashes	State websites				See next worksheet
Total Crashes	State websites				See next worksheet
Fatalities	State websites				See next worksheet
Fatalities from FARS	Fatality Analysis Reporting System (FARS)				http://www-fars.nhtsa.dot.gov/Main/index.aspx
Non-fatal injuries	State websites				See next worksheet
Vehicle miles traveled (VMT)	Environmental Protection Agency				http://www.epa.gov/otaq/nmim.htm
Population	Area Resource File				http://www.arf.hrsa.gov/
Land Area (square miles)	Area Resource File				http://www.arf.hrsa.gov/
Rural-Urban Continuum Code	Area Resource File				http://www.arf.hrsa.gov/

## Sheet: State Websites' Crash Data
State	Website
Alaska	http://www.dot.alaska.gov/stwdplng/highwaydata/accidents.shtml
Arkansas	http://www.asp.arkansas.gov/hso/hso_index.html
Arizona	http://www.azdot.gov/mvd/statistics/crash/index.asp
California	http://www.chp.ca.gov/switrs/#section1
Colorado	http://csp.state.co.us/stats.html
Connecticut	http://www.ct.gov/dot/taxonomy/ct_taxonomy.asp?DLN=39920&dotNav=|39920|&dotPNavCtr=|40775|
Delaware	Cannot locate any county-level data.
District of Columbia	http://ddot.dc.gov/ddot/cwp/view,a,1253,q,648140.asp
Florida	http://www.flhsmv.gov/html/safety.html
Georgia	http://www.gahighwaysafety.org/gacountycrashes.html
Hawii	Cannot locate any county-level data.
Idaho	http://itd.idaho.gov/ohs/stats.htm
Illinois	http://www.dot.il.gov/trafficsafety/crashreports.html
Indiana	http://www.in.gov/cji/2572.htm
Iowa	http://www.iowadot.gov/crashanalysis/county_concatenated.htm
Kansas	http://www.ksdot.org/burTransPlan/prodinfo/accista07.asp
Kentucky	http://www.kentuckystatepolice.org/data.htm
Louisiana	http://lacrashdata.lsu.edu/#
Maine	Cannot locate any county-level data.
Maryland	http://medschool.umaryland.edu/NSCforTrauma//traffic.asp
Massachusetts	Cannot locate any county-level data.
Michigan	http://www.michigantrafficcrashfacts.org/years/2008/2008coindividual.htm
Minnesota	http://www.dps.state.mn.us/OTS/crashdata/crash_facts.asp
Mississippi	Cannot locate any county-level data.
Missouri	http://www.mshp.dps.missouri.gov/MSHPWeb/SAC/publications_traffic.html
Montana	http://www.mdt.mt.gov/publications/datastats/crashdata.shtml
Nebraska	http://www.dor.state.ne.us/highway-safety/
Nevada	http://www.nevadadot.com/reports_pubs/NV_Crashes/
New Hampshire	Cannot locate any county-level data.
New Jersey	http://www.state.nj.us/transportation/refdata/accident/
New Mexico	http://www.unm.edu/~dgrint/annual.html
New York	http://www.nysdmv.com/stats-arc.htm
North Carolina	http://www.ncdot.org/doh/preconstruct/traffic/safety/Data/CrashFacts.html
North Dakota	http://www.dot.nd.gov/divisions/dlts/docs/crash-summary.pdf
Ohio	http://www.publicsafety.ohio.gov/crashes/crash_facts.asp
Oregon	http://www.oregon.gov/ODOT/TD/TDATA/car/CAR_Publications.shtml
Pennsylvania	http://www.dot.state.pa.us/Internet/Bureaus/pdBHSTE.nsf/InfoFbListing?OpenForm
Rhode Island	Cannot locate any county-level data.
South Dakota	http://dps.sd.gov/enforcement/accident_records/Annual_Crash_Reports.aspx
Tennessee	http://www.state.tn.us/safety/stats/CrashData/default.html
Texas	http://www.dot.state.tx.us/txdot_library/drivers_vehicles/publications/crash_statistics/crash_statistics_2007.htm
Utah	http://dps.sd.gov/enforcement/accident_records/Annual_Crash_Reports.aspx
Vermont	http://www.dps.state.vt.us/ghsp//crash_2006/PDF%20files/TCONTENT.htm
Virginia	http://www.dmv.state.va.us/webdoc/safety/crash_data/crash_facts/index.asp
Washington	http://www.wsdot.wa.gov/mapsdata/tdo/accidentannual.htm
West Virginia	http://www.transportation.wv.gov/highways/engineering/Manuals/Traffic/2003CrashData.pdf
Wisconsin	http://www.dot.wisconsin.gov/safety/motorist/crashfacts/
Wyoming	http://www.dot.state.wy.us/wydot/safety/safety_statistics
